# Supplementary material for: Copper-catalyzed enantioselective Mukaiyama aldol reaction of silyl enol ethers with isatins
Source: Royal Society of Chemistry journal article supplement (doi:10.1039/c9cc02159k), 2019-01-01
Supplement: c9cc02159k1.pdf [file c9cc02159k1.pdf]

# Supporting Information

## Copper-Catalyzed Enantioselective Mukaiyama aldol Reaction of Silyl Enol Ethers with isatins

Jindong Li,<sup>a</sup> Yanan Li,<sup>a</sup> Jianan Sun,<sup>a</sup> Yang Gui,<sup>a</sup> Yekai Huang,<sup>a</sup> Zhenggen Zha<sup>a</sup> and Zhiyong Wang\*<sup>a</sup>

<sup>[a]</sup>Hefei National Laboratory for Physical Sciences at Microscale, CAS Key Laboratory of Soft Matter Chemistry & Center for Excellence in Molecular Synthesis of Chinese Academy of Sciences, Collaborative Innovation Center of Suzhou Nano Science and Technology & School of Chemistry and Materials Science in University of Science and Technology of China, Hefei, Anhui 230026, P. R. China

Fax: (+86)551-63603185  
E-mail: zwang3@ustc.edu.cn

### Table of contents

|                                                                       |     |
|-----------------------------------------------------------------------|-----|
| <b>Part I Experimental Section</b>                                    | S2  |
| 1.1 General information                                               | S2  |
| 1.2 General procedures of the Mukaiyama aldol reaction                | S2  |
| 1.3 Procedure for Asymmetric Mukaiyama aldol reaction on a gram scale | S2  |
| 1.4 Optimization of the reaction conditions for the model reaction    | S3  |
| 1.5 Experimental data of 3-substituted 3-hydroxy-2-oxindole           | S5  |
| 1.6 A Plausible Structure of the Transition State                     | S13 |
| <b>Part II NMR spectra</b>                                            | S14 |
| <b>Part III HPLC spectra</b>                                          | S44 |
| <b>Part IV Crystal structure data</b>                                 | S64 |

## Part I Experimental Section

### 1.1 General information

<sup>1</sup>H NMR and <sup>13</sup>C NMR were recorded on a Bruker-400MHz Spectrometer (<sup>1</sup>H NMR: 400MHz, <sup>13</sup>C NMR: 100MHz) using TMS as internal reference. The chemical shifts ( $\delta$ ) and coupling constants ( $J$ ) were expressed in ppm and Hz, respectively. HPLC analysis was carried out on an Agilent 1100 series HPLC with a multiple wavelength detector. Chiralpak AD-H columns were purchased from Daicel Chemical Industries, LTD. Optical rotations were measured on a PerKinElmer™ Polarimeter (Model 343). HRMS (ESI) were recorded on a Waters™ Q-TOF Premier. IR spectra were recorded on Thermo Scientific Nicolet iS10. Commercially available compounds were used without further purification. Solvents were purified according to the standard procedures unless otherwise noted. Ligands<sup>1</sup>, various silyl enol ethers<sup>2</sup>, N-methyl isatin<sup>3</sup>, N-benzyl isatin<sup>4</sup>, were prepared according to literature procedures.

### 1.2 General procedures of the Mukaiyama aldol reactions (**3ab** as an example)

A mixture of Ligand (**L**<sub>4</sub>, 5.6 mg, 0.01 mmol), CuBr<sub>2</sub> (2.2 mg, 0.01 mmol), AgSbF<sub>6</sub> (6.86 mg, 0.02 mmol), N-Ethylmorpholine (1.27  $\mu$ L, 0.01 mmol) in *i*-PrOH (1.0 mL) was stirred for 1.5h at ambient atmosphere. Then centrifugal to remove the precipitate, and isatin **1a** (14.7 mg, 0.1 mmol) and water (20  $\mu$ L, 1 mmol) were added to the supernatant. And the resulting mixture was cooled to -10 °C. After 30 min, the silicon enolates **2b** (100  $\mu$ L, 0.45mmol) was added slowly and carried out at -10 °C. After reactions were finished (monitored by TLC), and extracted with ethyl acetate (3  $\times$  3 mL). The organic phase was dried with Na<sub>2</sub>SO<sub>4</sub> and evaporated in vacuum. Purification by flash column chromatograph (petroleum ether / ethyl acetate = 2:1) afforded **3ab** as a white solid: 91% yield, 26.6mg, 97% ee, >20:1 dr.

### 1.3 Procedure for Asymmetric Mukaiyama aldol reaction on a gram scale

A mixture of Ligand (**L**<sub>4</sub>, 112 mg, 0.2 mmol), CuBr<sub>2</sub> (44 mg, 0.2 mmol), AgSbF<sub>6</sub> (137.2 mg, 0.4 mmol), N-Ethylmorpholine (27.8  $\mu$ L, 0.2 mmol) in *i*-PrOH (20 mL) was stirred for 1.5 h at ambient atmosphere. Then centrifugal to remove the precipitate, and isatin **1c** (1.8 g, 10 mmol) and water (2 mL, 0.1 mol) were added to the supernatant. And the resulting mixture was cooled to -10 °C. After 30 min, the silicon enolates **2b** (10 mL, 45mmol) was added slowly

and carried out at -10 °C. After reactions were finished (monitored by TLC), and extracted with ethyl acetate (3 × 50 mL). The organic phase was dried with Na<sub>2</sub>SO<sub>4</sub> and evaporated in vacuum. Purification by flash column chromatography (petroleum ether / ethyl acetate = 2:1) afforded **3cb** as a white solid: 91% yield, 2.9g, 99% ee, 11:1 dr.

## 1.4 Optimization of the reaction conditions for the model reaction<sup>a</sup>

(a) Effect of solvent:<sup>a</sup>

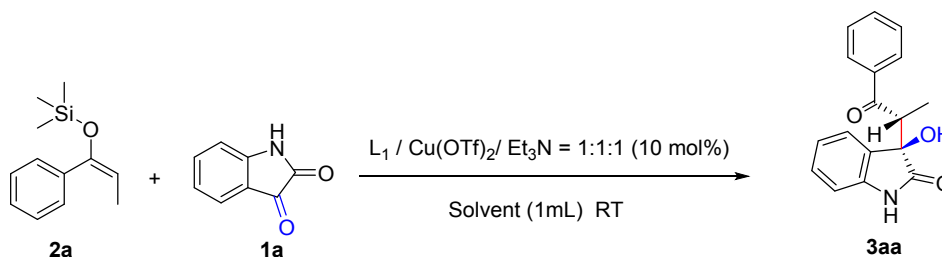

| entry | solvent                            | yield <sup>b</sup> (%) | ee <sup>c</sup> (%) | dr <sup>d</sup> |
|-------|------------------------------------|------------------------|---------------------|-----------------|
| 1     | MeOH                               | 81                     | 69                  | 2:1             |
| 2     | EtOH                               | 74                     | 73                  | 3:1             |
| 3     | <i>i</i> -PrOH                     | 80                     | 81                  | 3:1             |
| 4     | CF <sub>3</sub> CH <sub>2</sub> OH | 38                     | 11                  | 1:1             |
| 5     | MTBE                               | 45                     | 25                  | 2:1             |
| 6     | THF                                | 57                     | 73                  | 2:1             |

<sup>a</sup>Unless otherwise noted, the reaction of **1a** (0.1 mmol) and **2a** (0.45 mmol) was performed in the presence of **L**<sub>1</sub> (10 mol %), Et<sub>3</sub>N (10 mol %), and Cu(OTf)<sub>2</sub> (10 mol %) in solvent (1.0 mL) at RT. <sup>b</sup>Isolated yield. <sup>c</sup>Determined by chiral HPLC analysis. <sup>d</sup>Determined by crude <sup>1</sup>H NMR.

(b) Effect of base:<sup>a</sup>

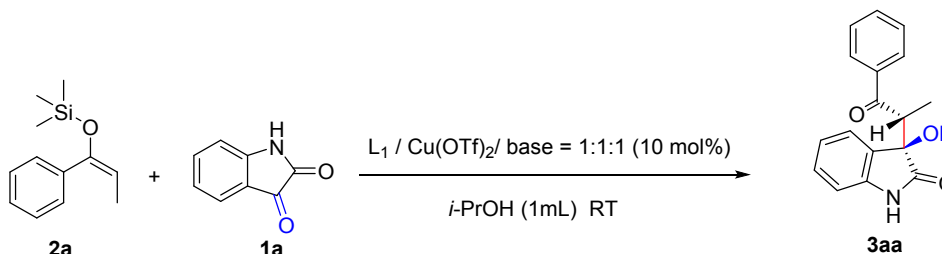

| entry | base              | yield <sup>b</sup> (%) | ee <sup>c</sup> (%) | dr <sup>d</sup> |
|-------|-------------------|------------------------|---------------------|-----------------|
| 1     | Et <sub>3</sub> N | 81                     | 81                  | 3:1             |

|   |                                 |    |    |     |
|---|---------------------------------|----|----|-----|
| 2 | DBU                             | 61 | 81 | 3:1 |
| 3 | N-Ethylmorpholine               | 80 | 83 | 3:1 |
| 4 | Piperidine                      | 82 | 77 | 3:1 |
| 5 | DABCO                           | 79 | 82 | 3:1 |
| 6 | DIPEA                           | 80 | 59 | 3:1 |
| 7 | Li <sub>2</sub> CO <sub>3</sub> | 63 | 73 | 3:1 |
| 8 | Cs <sub>2</sub> CO <sub>3</sub> | 78 | 71 | 3:1 |
| 9 | <i>t</i> -BuOK                  | 70 | 79 | 3:1 |

<sup>a</sup>Unless otherwise noted, the reaction of **1a** (0.1 mmol) and **2a** (0.45 mmol) was performed in the presence of **L**<sub>1</sub> (10 mol %), base (10 mol %), and Cu(OTf)<sub>2</sub> (10 mol %) in *i*-PrOH (1.0 mL) at RT. <sup>b</sup>Isolated yield. <sup>c</sup> Determined by chiral HPLC analysis. <sup>d</sup> Determined by crude <sup>1</sup>H NMR.

(b) Effect of copper salts:<sup>a</sup>

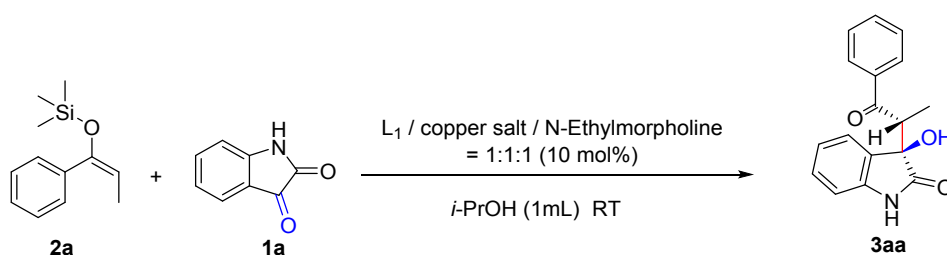

| entry | copper salt                            | yield <sup>b</sup> (%) | ee <sup>c</sup> (%) | dr <sup>d</sup> |
|-------|----------------------------------------|------------------------|---------------------|-----------------|
| 1     | Cu(OTf) <sub>2</sub>                   | 80                     | 83                  | 3:1             |
| 2     | Cu(OAc) <sub>2</sub> ·H <sub>2</sub> O | 44                     | 55                  | 2:1             |
| 3     | CuCl <sub>2</sub> ·2H <sub>2</sub> O   | 72                     | 79                  | 3:1             |
| 4     | CuBr <sub>2</sub>                      | 70                     | 67                  | 3:1             |
| 5     | CuClO <sub>4</sub> ·6H <sub>2</sub> O  | 61                     | 81                  | 3:1             |
| 6     | Cu(SbF <sub>6</sub> ) <sub>2</sub>     | 83                     | 83                  | 5:1             |

<sup>a</sup>The reaction of **1a** (0.1 mmol) and **2a** (0.45 mmol) was performed in the presence of **L**<sub>1</sub> (10 mol %), N-Ethylmorpholine (10 mol %), and copper salt (10 mol %) in *i*-PrOH (1.0 mL) at RT.

<sup>b</sup>Isolated yield. <sup>c</sup> Determined by chiral HPLC analysis. <sup>d</sup> Determined by crude <sup>1</sup>H NMR.

## 1.5 Experimental data of 3-substituted 3-hydroxy-2-oxindole

### (R)-3-hydroxy-3-((R)-1-oxo-1,2,3,4-tetrahydronaphthalen-2-yl)indolin-2-one (3ab)

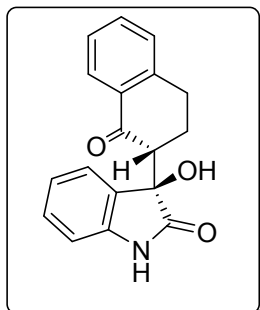

The title compound was prepared according to the general working procedure and purified by flash column chromatography (petroleum ether / ethyl acetate = 2:1) to give the product as a white solid: 91% yield, 26.6 mg; mp = 176-178 °C;  $[\alpha]_D^{20} +101.4$  (c = 0.49, CHCl<sub>3</sub>, 97% ee); HPLC: Daicel Chiralpak AD-H, hexane: 2-propanol = 70:30, flow rate = 1.0 mL/min, T = 23°C, UV = 240 nm,  $t_R$  = 7.9 min (minor),  $t_R$  = 20.4 min (major); <sup>1</sup>H NMR (400 MHz, CD<sub>3</sub>OD):  $\delta$  7.91-7.89 (dd,  $J_1$  = 9.1 Hz,  $J_2$  = 1.2 Hz, 1H), 7.47-7.43 (td,  $J_1$  = 7.5 Hz,  $J_2$  = 1.4 Hz, 1H), 7.28-7.18 (m, 4H), 6.91-6.85 (m, 2H), 3.33-3.28 (m, 1H), 3.04-2.95 (m, 1H), 2.86-2.80 (dt,  $J_1$  = 16.7 Hz,  $J_2$  = 3.8 Hz, 1H), 2.21-2.15 (m, 1H), 1.75-1.64 (m, 1H); <sup>13</sup>C NMR (100 MHz, CDCl<sub>3</sub>):  $\delta$  201.8, 177.3, 144.4, 141.1, 134.6, 132.2, 129.85, 129.83, 128.8, 127.5, 127.0, 124.9, 123.2, 110.7, 79.3, 51.9, 28.5, 24.6; IR (film, v/cm<sup>-1</sup>): 3281, 2452, 1708, 1670, 1612, 1597, 1479, 1468, 1458, 1353, 1336, 1317, 1228, 1205, 1153, 1090, 1069, 767, 745; HRMS (ESI) m/z calcd for C<sub>18</sub>H<sub>15</sub>NO<sub>3</sub> [M+H]<sup>+</sup> 294.1130, found 294.1134.

### (R)-5-fluoro-3-hydroxy-3-((R)-1-oxo-1,2,3,4-tetrahydronaphthalen-2-yl)indolin-2-one (3bb)

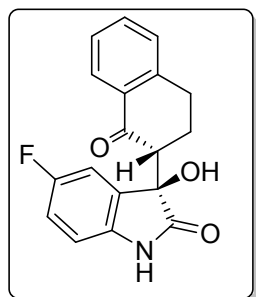

The title compound was prepared according to the general working procedure and purified by flash column chromatography (petroleum ether / ethyl acetate = 2:1) to give the product as a white solid: 90% yield, 28.0 mg; mp = 205-207 °C;  $[\alpha]_D^{20} +15.2$  (c = 0.33, CHCl<sub>3</sub>, 91% ee); HPLC: Daicel Chiralpak AD-H, hexane: 2-propanol = 70:30, flow rate = 1.0 mL/min, T = 23°C, UV = 230 nm,  $t_R$  = 7.8 min (minor),  $t_R$  = 20.1 min (major); <sup>1</sup>H NMR (400 MHz, CD<sub>3</sub>OD):  $\delta$  7.92-7.90 (d,  $J$  = 7.4 Hz, 1H), 7.52-7.48 (td,  $J_1$  = 7.4 Hz,  $J_2$  = 1.2 Hz, 1H), 7.31-7.24 (m, 2H), 7.07-7.05 (dd,  $J_1$  = 8.2 Hz,  $J_2$  = 2.5 Hz, 1H), 6.99-6.94 (m, 1H), 6.88-6.84 (m, 1H), 3.39-3.35 (m, 1H), 3.09-3.03 (m, 1H), 2.96-2.90 (m, 1H), 2.32-2.26 (m, 1H), 1.89-1.79 (m, 1H); <sup>13</sup>C NMR (100 MHz, CDCl<sub>3</sub>):  $\delta$  201.6, 177.1, 159.2 (<sup>1</sup>J<sub>CF</sub> = 240.4 Hz), 144.3, 136.9 (<sup>4</sup>J<sub>CF</sub> = 1.9 Hz), 134.8, 132.0, 131.3 (<sup>3</sup>J<sub>CF</sub> = 7.6 Hz), 128.8, 127.7, 127.1, 116.2 (<sup>2</sup>J<sub>CF</sub> = 23.4 Hz), 113.1 (<sup>2</sup>J<sub>CF</sub> = 25.0 Hz), 111.4 (<sup>3</sup>J<sub>CF</sub> = 7.8 Hz), 79.5, 51.9, 28.5, 24.5; IR (film, v/cm<sup>-1</sup>): 3236, 2921, 2850, 2361, 1716, 1627, 1597, 1478, 1456, 1304, 1262, 1104, 778, 750; HRMS (ESI) m/z calcd for C<sub>18</sub>H<sub>14</sub>FNO<sub>3</sub> [M+H]<sup>+</sup> 312.1036, found 312.1036.

### (R)-5-chloro-3-hydroxy-3-((R)-1-oxo-1,2,3,4-tetrahydronaphthalen-2-yl)indolin-2-one (3cb)

The title compound was prepared according to the general working procedure and purified by flash column chromatography (petroleum ether / ethyl acetate = 2:1) to give the product as a white solid: 95% yield, 31.1 mg; mp = 198-201 °C;  $[\alpha]_D^{20} +101.2$  (c = 0.39, CHCl<sub>3</sub>, 99% ee); HPLC: Daicel Chiralpak AD-H, hexane: 2-propanol = 70:30, flow rate = 1.0 mL/min, T = 23°C, UV = 240 nm,  $t_R$

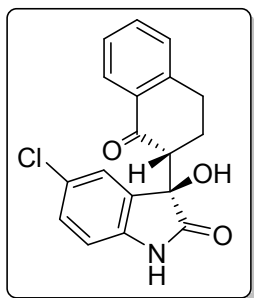

= 8.1 min (minor),  $t_R$  = 20.6 min (major);  $^1\text{H}$  NMR (400 MHz,  $\text{DMSO-d}_6$ ):  $\delta$  10.39 (s, 1H), 7.70-7.68 (m, 1H), 7.55-7.50 (m, 1H), 7.34-7.29 (m, 3H), 7.24-7.22 (m, 1H), 6.84-6.82 (m, 1H), 6.18 (s, 1H), 3.64-3.60 (dd,  $J_1$  = 13.6 Hz,  $J_2$  = 4.0 Hz, 1H), 3.12-2.99 (m, 2H), 2.62-2.58 (m, 1H), 2.32-2.20 (m, 1H);  $^{13}\text{C}$  NMR (100 MHz,  $\text{DMSO-d}_6$ ):  $\delta$  197.8, 178.1, 144.9, 142.1, 136.2, 134.0, 132.7, 129.3, 126.9, 126.6, 125.6, 123.8, 111.1, 74.3, 54.7, 24.2, 21.2; IR (film,  $\text{v/cm}^{-1}$ ): 3347, 2941, 2360, 1735, 1716, 1667, 1620, 1597, 1482, 1367, 1315, 1149, 884, 831, 813, 795, 750; HRMS (ESI)  $m/z$  calcd for  $\text{C}_{18}\text{H}_{14}\text{ClNO}_3$   $[\text{M}+\text{H}]^+$  328.0740, found 328.0737.

### (R)-5-bromo-3-hydroxy-3-((R)-1-oxo-1,2,3,4-tetrahydronaphthalen-2-yl)indolin-2-one (3db)

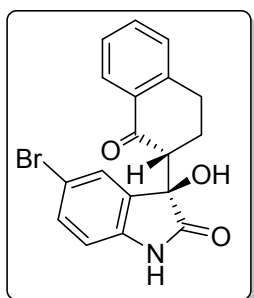

The title compound was prepared according to the general working procedure and purified by flash column chromatography (petroleum ether / ethyl acetate = 2:1) to give the product as a white solid: 89% yield, 33.1 mg; mp = 188-190 °C;  $[\alpha]_D^{20}$  +22.3 (c = 0.30,  $\text{CHCl}_3$ , 97% ee); HPLC: Daicel Chiralpak AD-H, hexane: 2-propanol = 70:30, flow rate = 1.0 mL/min, T = 23°C, UV = 254 nm,  $t_R$  = 18.4 min (minor),  $t_R$  = 22.4 min (major);  $^1\text{H}$  NMR (400 MHz,  $\text{DMSO-d}_6$ ):  $\delta$  10.39 (s, 1H), 7.69-7.67 (dd,  $J_1$  = 7.8 Hz,  $J_2$  = 1.1 Hz, 1H), 7.55-7.51 (td,  $J_1$  = 7.4 Hz,  $J_2$  = 1.4 Hz, 1H), 7.42-7.41 (d,  $J$  = 2.0 Hz, 1H), 7.37-7.27 (m, 3H), 6.79-6.77 (d,  $J$  = 8.2 Hz, 1H), 6.16 (s, 1H), 3.64-3.60 (dd,  $J_1$  = 13.6 Hz,  $J_2$  = 4.0 Hz, 1H), 3.12-2.98 (m, 2H), 2.61-2.57 (m, 1H), 2.30-2.19 (m, 1H);  $^{13}\text{C}$  NMR (100 MHz,  $\text{CDCl}_3$ ):  $\delta$  201.5, 176.3, 144.2, 139.9, 134.8, 132.7, 132.0, 131.9, 128.8, 128.3, 127.6, 127.1, 116.0, 112.0, 79.0, 51.9, 28.6, 24.5; IR (film,  $\text{v/cm}^{-1}$ ): 3339, 2918, 2849, 2476, 1716, 1667, 1615, 1598, 1365, 1314, 1228, 1171, 1147, 1113, 883, 827; HRMS (ESI)  $m/z$  calcd for  $\text{C}_{18}\text{H}_{14}\text{BrNO}_3$   $[\text{M}+\text{H}]^+$  372.0235, found 372.0234.

### (R)-3-hydroxy-5-methyl-3-((R)-1-oxo-1,2,3,4-tetrahydronaphthalen-2-yl)indolin-2-one (3eb)

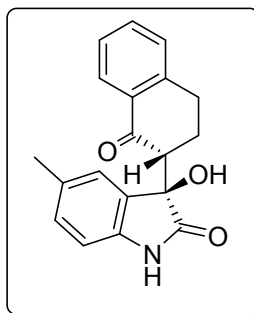

The title compound was prepared according to the general working procedure and purified by flash column chromatography (petroleum ether / ethyl acetate = 2:1) to give the product as a white solid: 91% yield, 27.9 mg; mp = 175-177 °C;  $[\alpha]_D^{20}$  +168.6 (c = 0.7,  $\text{CHCl}_3$ , 98% ee); HPLC: Daicel Chiralpak AD-H, hexane: 2-propanol = 70:30, flow rate = 1.0 mL/min, T = 23°C, UV = 254 nm,  $t_R$  = 7.9 min (minor),  $t_R$  = 15.1 min (major);  $^1\text{H}$  NMR (400 MHz,  $\text{CD}_3\text{OD}$ ):  $\delta$  7.96-7.93 (dd,  $J_1$  = 7.9 Hz,  $J_2$  = 1.1 Hz, 1H), 7.52-7.47 (td,  $J_1$  = 7.5 Hz,  $J_2$  = 1.4 Hz, 1H), 7.33-7.29 (t,  $J$  = 7.5 Hz, 1H), 7.25-7.23 (d,  $J$  = 7.6 Hz, 1H), 7.07-7.02 (m, 2H), 6.78-6.76 (d,  $J$  = 7.8 Hz, 1H), 3.34-3.30 (m, 1H), 3.07-2.99 (m, 1H), 2.89-2.82 (dt,  $J_1$  = 16.8 Hz,  $J_2$  = 3.8 Hz, 1H), 2.22-2.17 (m, 4H), 1.77-1.67 (m, 1H);  $^{13}\text{C}$  NMR (100 MHz,  $\text{CD}_3\text{OD}$ ):  $\delta$  199.6, 178.3, 144.4, 139.6, 133.8, 132.6, 131.9, 130.9, 129.4, 128.5, 126.5, 126.3, 124.8, 109.6, 77.3, 53.0, 28.3, 24.3, 19.7; IR (film,  $\text{v/cm}^{-1}$ ): 3339, 2918, 2849, 2476, 1716, 1667, 1615, 1598, 1365, 1314, 1228, 1171, 1147, 1113, 883, 827; HRMS (ESI)  $m/z$  calcd for  $\text{C}_{19}\text{H}_{18}\text{NO}_3$   $[\text{M}+\text{H}]^+$  308.1287, found 308.1287.

### (R)-3-hydroxy-5-methoxy-3-((R)-1-oxo-1,2,3,4-tetrahydronaphthalen-2-yl)indolin-2-one (3fb)

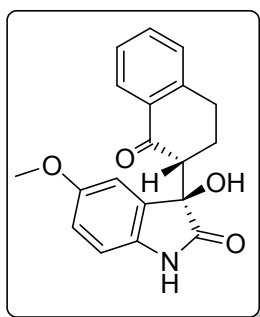

The title compound was prepared according to the general working procedure and purified by flash column chromatography (petroleum ether / ethyl acetate = 2:1) to give the product as a yellow oil: 88% yield, 28.4 mg;  $[\alpha]_D^{20} +17.0$  ( $c = 0.24$ ,  $\text{CHCl}_3$ , 92% *ee*); HPLC: Daicel Chiralpak AD-H, hexane: 2-propanol = 70:30, flow rate = 1.0 mL/min,  $T = 23^\circ\text{C}$ , UV = 240 nm,  $t_R = 10.3$  min (minor),  $t_R = 20.2$  min (major);  $^1\text{H NMR}$  (400 MHz,  $\text{DMSO-d}_6$ ):  $\delta$  10.09 (s, 1H), 7.72-7.70 (m, 1H), 7.54-7.50 (td,  $J_1 = 7.3$  Hz,  $J_2 = 1.3$  Hz, 1H), 7.32-7.28 (m, 2H), 6.87-6.86 (m, 1H), 6.75-6.70 (m, 2H), 6.0 (s, 1H), 3.63 (s, 3H), 3.50-3.45 (dd,  $J_1 = 13.3$  Hz,  $J_2 = 4.1$  Hz, 1H), 3.09-2.92 (m, 2H), 2.54-2.51 (m, 1H), 2.21-2.10 (m, 1H);  $^{13}\text{C NMR}$  (100 MHz,  $\text{CD}_3\text{OD}$ ):  $\delta$  199.5, 178.2, 156.0, 144.4, 135.2, 133.8, 132.6, 131.9, 128.5, 126.5, 126.4, 113.9, 111.2, 110.3, 77.6, 54.7, 53.0, 28.2, 24.3; IR (film,  $\text{v/cm}^{-1}$ ): 3262, 2918, 2849, 2361, 1718, 1676, 1598, 1353, 1301, 1261, 1204, 1155, 871, 806; HRMS (ESI)  $m/z$  calcd for  $\text{C}_{19}\text{H}_{17}\text{NO}_4$   $[\text{M}+\text{H}]^+$  324.1236, found 324.1234.

### (R)-3-hydroxy-5-nitro-3-((R)-1-oxo-1,2,3,4-tetrahydronaphthalen-2-yl)indolin-2-one (3gb)

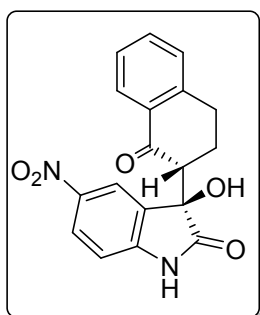

The title compound was prepared according to the general working procedure and purified by flash column chromatography (petroleum ether / ethyl acetate = 2:1) to give the product as a yellow oil: 75% yield, 25.3 mg;  $[\alpha]_D^{20} +98.8$  ( $c = 0.47$ ,  $\text{CHCl}_3$ , 99% *ee*); HPLC: Daicel Chiralpak AD-H, hexane: 2-propanol = 70:30, flow rate = 1.0 mL/min,  $T = 23^\circ\text{C}$ , UV = 240 nm,  $t_R = 9.8$  min (minor),  $t_R = 30.4$  min (major);  $^1\text{H NMR}$  (400 MHz,  $\text{CD}_3\text{OD}$ ):  $\delta$  8.15-8.09 (m, 2H), 7.73-7.71 (d,  $J = 7.8$  Hz, 1H), 7.42-7.38 (td,  $J_1 = 7.6$  Hz,  $J_2 = 1.2$  Hz, 1H), 7.21-7.15 (m, 2H), 6.97-6.95 (d,  $J = 8.0$  Hz, 1H), 3.49-3.43 (dd,  $J_1 = 13.7$  Hz,  $J_2 = 4.0$  Hz, 1H), 3.09-3.01 (m, 1H), 2.96-2.90 (dt,  $J_1 = 16.0$  Hz,  $J_2 = 3.8$  Hz, 1H), 2.49-2.43 (m, 1H), 2.10-2.03 (m, 1H);  $^{13}\text{C NMR}$  (100 MHz,  $\text{CD}_3\text{OD}$ ):  $\delta$  198.3, 178.9, 148.8, 144.4, 143.1, 133.6, 133.5, 132.3, 129.4, 128.5, 126.4, 126.2, 125.9, 119.1, 109.4, 74.9, 54.5, 28.9, 24.0; IR (film,  $\text{v/cm}^{-1}$ ): 3263, 2917, 2849, 2458, 1712, 1676, 1617, 1595, 1330, 1360, 1217, 1063, 975, 871, 799, 753; HRMS (ESI)  $m/z$  calcd for  $\text{C}_{18}\text{H}_{14}\text{N}_2\text{O}_5$   $[\text{M}+\text{Na}]^+$  361.0800, found 361.0793.

### (R)-6-fluoro-3-hydroxy-3-((R)-1-oxo-1,2,3,4-tetrahydronaphthalen-2-yl)indolin-2-one (3hb)

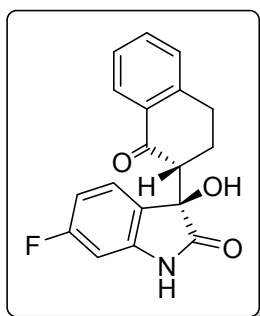

The title compound was prepared according to the general working procedure and purified by flash column chromatography (petroleum ether / ethyl acetate = 2:1) to give the product as a white solid: 85% yield, 26.4 mg, mp = 229-231  $^\circ\text{C}$ ;  $[\alpha]_D^{20} +162.9$  ( $c = 0.41$ ,  $\text{CHCl}_3$ , 98% *ee*); HPLC: Daicel Chiralpak AD-H, hexane: 2-propanol = 70:30, flow rate = 1.0 mL/min,  $T = 23^\circ\text{C}$ , UV = 240 nm,  $t_R = 8.3$  min (minor),  $t_R = 24.6$  min (major);  $^1\text{H NMR}$  (400 MHz,  $\text{CD}_3\text{OD}$ ):  $\delta$  7.93-7.91 (d,  $J = 7.8$  Hz, 1H), 7.53-7.49 (m, 1H), 7.33-7.27 (m, 3H), 6.71-6.66 (m, 2H), 3.41-3.36 (dd,  $J_1 = 13.4$  Hz,  $J_2 = 4.1$  Hz, 1H), 3.09-3.04 (m, 1H), 2.97-2.91 (dt,  $J_1 = 16.7$  Hz,  $J_2 = 3.7$  Hz, 1H), 2.33-2.27 (m, 1H), 1.91-1.80 (m, 1H), 2.15-2.03 (m, 1H);  $^{13}\text{C NMR}$  (100 MHz,  $\text{CD}_3\text{OD}$ ):  $\delta$  199.1, 178.7, 163.6 ( $^1J=243.2$  Hz), 144.3, 144.0 ( $^3J=12.1$  Hz), 133.7, 132.5, 128.5, 127.0 ( $^4J= 3.1$  Hz),

126.5, 126.3, 125.4 ( $^3J = 9.9$  Hz), 107.9 ( $^2J = 22.2$  Hz), 98.1 ( $^2J = 27.3$  Hz), 76.2, 53.5, 28.5, 24.3; IR (film,  $\nu/\text{cm}^{-1}$ ): 3263, 2917, 2849, 2458, 1712, 1676, 1617, 1595, 1330, 1360, 1217, 1063, 975, 871, 799, 753; HRMS (ESI)  $m/z$  calcd for  $\text{C}_{18}\text{H}_{14}\text{FNO}_3$   $[\text{M}+\text{Na}]^+$  334.0855, found 334.0854.

#### (R)-6-chloro-3-hydroxy-3-((R)-1-oxo-1,2,3,4-tetrahydronaphthalen-2-yl)indolin-2-one (3ib)

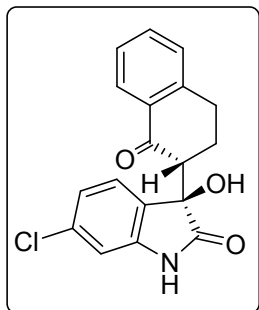

The title compound was prepared according to the general working procedure and purified by flash column chromatography (petroleum ether / ethyl acetate = 2:1) to give the product as a yellow oil: 87% yield, 28.8mg;  $[\alpha]_{\text{D}}^{20} +123.9$  ( $c = 0.72$ ,  $\text{CHCl}_3$ , 93% *ee*); HPLC: Daicel Chiralpak AD-H, hexane: 2-propanol = 70:30, flow rate = 1.0 mL/min,  $T = 23^\circ\text{C}$ , UV = 240 nm,  $t_{\text{R}} = 8.7$  min (minor),  $t_{\text{R}} = 34.1$  min (major);  $^1\text{H}$  NMR (400 MHz,  $\text{CD}_3\text{OD}$ ):  $\delta$  7.89-7.86 (dd,  $J_1 = 7.8$  Hz,  $J_2 = 1.0$  Hz, 1H), 7.51-7.47 (td,  $J_1 = 7.4$  Hz,  $J_2 = 1.4$  Hz, 1H), 7.30-7.22 (m, 3H), 6.94-6.91 (m, 2H), 3.39-3.35 (dd,  $J_1 = 13.5$  Hz,  $J_2 = 4.2$  Hz, 1H), 3.11-3.02 (m, 1H), 2.96-2.90 (dt,  $J_1 = 16.6$  Hz,  $J_2 = 3.8$  Hz, 1H), 2.35-2.28 (m, 1H), 1.93-1.82 (m, 1H);  $^{13}\text{C}$  NMR (100 MHz,  $\text{CDCl}_3$ ):  $\delta$  201.6, 176.7, 144.3, 142.1, 135.5, 134.7, 132.1, 128.8, 128.2, 127.5, 127.0, 126.1, 123.2, 111.1, 78.7, 51.9, 28.5, 24.6; IR (film,  $\nu/\text{cm}^{-1}$ ): 3262, 2921, 2850, 2361, 1721, 1610, 1597, 1482, 1454, 1360, 1317, 1183, 1156, 892, 855; HRMS (ESI)  $m/z$  calcd for  $\text{C}_{18}\text{H}_{14}\text{ClNO}_3$   $[\text{M}+\text{H}]^+$  328.0740, found 328.0738.

#### (R)-6-bromo-3-hydroxy-3-((R)-1-oxo-1,2,3,4-tetrahydronaphthalen-2-yl)indolin-2-one (3jb)

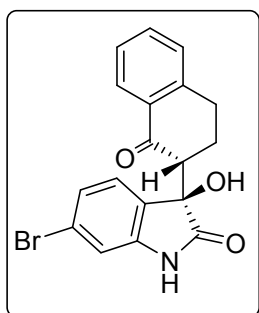

The title compound was prepared according to the general working procedure and purified by flash column chromatography (petroleum ether / ethyl acetate = 2:1) to give the product as a white solid: 89% yield, 33.1mg, mp = 202-205  $^\circ\text{C}$ ;  $[\alpha]_{\text{D}}^{20} +98.8$  ( $c = 0.52$ ,  $\text{CHCl}_3$ , 93% *ee*); HPLC: Daicel Chiralpak AD-H, hexane: 2-propanol = 70:30, flow rate = 1.0 mL/min,  $T = 23^\circ\text{C}$ , UV = 254 nm,  $t_{\text{R}} = 9.2$  min (minor),  $t_{\text{R}} = 37.2$  min (major);  $^1\text{H}$  NMR (400 MHz,  $\text{CD}_3\text{OD}$ ):  $\delta$  7.88-7.86 (m, 1H), 7.50-7.46 (td,  $J_1 = 7.4$  Hz,  $J_2 = 1.3$  Hz, 1H), 7.29-7.24 (m, 2H), 7.18-7.16 (m, 1H), 7.09-7.05 (m, 2H), 3.39-3.35 (dd,  $J_1 = 13.5$  Hz,  $J_2 = 4.2$  Hz, 1H), 3.10-3.02 (m, 1H), 2.96-2.90 (dt,  $J_1 = 16.5$  Hz,  $J_2 = 3.8$  Hz, 1H), 2.35-2.29 (m, 1H), 1.94-1.83 (m, 1H);  $^{13}\text{C}$  NMR (100 MHz,  $\text{CDCl}_3$ ):  $\delta$  201.6, 176.7, 144.3, 142.2, 134.7, 132.1, 128.8, 128.7, 127.5, 127.0, 126.4, 126.2, 123.4, 114.0, 78.8, 51.8, 28.8, 24.8; IR (film,  $\nu/\text{cm}^{-1}$ ): 3308, 2919, 2870, 2848, 2460, 1706, 1673, 1602, 1478, 1454, 1323, 1304, 1153, 1114, 867, 805; HRMS (ESI)  $m/z$  calcd for  $\text{C}_{18}\text{H}_{14}\text{BrNO}_3$   $[\text{M}+\text{H}]^+$  372.0235, found 372.0236.

#### (R)-3-hydroxy-6-methoxy-3-((R)-1-oxo-1,2,3,4-tetrahydronaphthalen-2-yl)indolin-2-one (3kb)

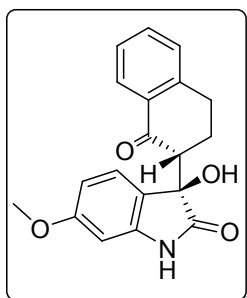

The title compound was prepared according to the general working procedure and purified by flash column chromatography (petroleum ether / ethyl acetate = 2:1) to give the product as a white solid: 84% yield, 27.1mg, mp = 182-184  $^\circ\text{C}$ ;  $[\alpha]_{\text{D}}^{20} +110.3$  ( $c = 0.95$ ,  $\text{CHCl}_3$ , 95% *ee*); HPLC: Daicel Chiralpak AD-H, hexane: 2-propanol = 70:30, flow rate =



1.0 mL/min, T = 23°C, UV = 230 nm,  $t_R$  = 11.5 min (minor),  $t_R$  = 41.6 min (major);  $^1\text{H NMR}$  (400 MHz,  $\text{CD}_3\text{OD}$ ):  $\delta$  7.95-7.93 (d,  $J$  = 7.8 Hz, 1H), 7.50-7.46 (m, 1H), 7.31-7.27 (t,  $J$  = 7.4 Hz, 1H), 7.23-7.22 (d,  $J$  = 7.5 Hz, 1H), 7.15-7.13 (d,  $J$  = 8.2 Hz, 1H), 6.48-6.43 (m, 2H), 3.73 (s, 3H), 3.29-3.26 (m, 1H), 3.06-2.97 (m, 1H), 2.86-2.82 (m, 1H), 2.16-2.10 (m, 1H), 1.70-1.61 (m, 1H);  $^{13}\text{C NMR}$  (100 MHz,  $\text{CDCl}_3$ ):  $\delta$  201.8, 177.6, 161.1, 144.4, 142.3, 134.5, 132.2, 128.8, 127.4, 126.9, 125.9, 121.6, 107.8, 97.7, 78.9, 55.4, 52.1, 28.5, 24.6; IR (film,  $\text{v}/\text{cm}^{-1}$ ): 3292, 2917, 2849, 2476, 1723, 1675, 1618, 1597, 1353, 1305, 1261, 1215, 1174, 1155, 1108, 890, 860, 837, 813; HRMS (ESI)  $m/z$  calcd for  $\text{C}_{19}\text{H}_{17}\text{NO}_4$   $[\text{M}+\text{Na}]^+$  346.1055, found 346.1053.

#### (R)-4-bromo-3-hydroxy-3-((R)-1-oxo-1,2,3,4-tetrahydronaphthalen-2-yl)indolin-2-one (3lb)

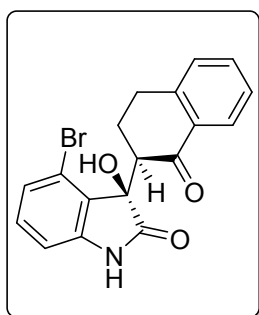

The title compound was prepared according to the general working procedure and purified by flash column chromatography (petroleum ether / ethyl acetate = 2:1) to give the product as a yellow oil: 83% yield, 30.8 mg;  $[\alpha]_D^{20}$  +96.4 ( $c$  = 0.42,  $\text{CHCl}_3$ , 98% *ee*); HPLC: Daicel Chiralpak AD-H, hexane: 2-propanol = 70:30, flow rate = 1.0 mL/min, T = 23°C, UV = 240 nm,  $t_R$  = 8.3 min (minor),  $t_R$  = 60.6 min (major);  $^1\text{H NMR}$  (400 MHz,  $\text{CD}_3\text{OD}$ ):  $\delta$  7.73-7.71 (d,  $J$  = 7.8 Hz, 1H), 7.50-7.47 (t,  $J$  = 7.4 Hz, 1H), 7.32-7.31 (d,  $J$  = 7.6 Hz, 1H), 7.26-7.22 (t,  $J$  = 7.5 Hz, 1H), 7.15-7.07 (m, 2H), 6.90-6.88 (d,  $J$  = 7.4 Hz, 1H), 4.23-4.18 (dd,  $J_1$  = 16.6 Hz,  $J_2$  = 3.8 Hz, 1H), 3.14-3.04 (m, 2H), 2.82-2.78 (m, 1H), 2.61-2.50 (m, 1H);  $^{13}\text{C NMR}$  (100 MHz,  $\text{CD}_3\text{OD}$ ):  $\delta$  198.0, 178.7, 144.8, 144.4, 133.4, 132.4, 130.8, 130.3, 128.5, 126.3, 126.1, 126.0, 117.7, 108.9, 75.8, 53.0, 29.5, 23.3; IR (film,  $\text{v}/\text{cm}^{-1}$ ): 2917, 2849, 1731, 1612, 1582, 1445, 1301, 1259, 1208, 1140, 1073, 872, 751, 695; HRMS (ESI)  $m/z$  calcd for  $\text{C}_{18}\text{H}_{14}\text{BrNO}_3$   $[\text{M}+\text{Na}]^+$  394.0055, found 394.0054.

#### (R)-4-chloro-3-hydroxy-3-((R)-1-oxo-1,2,3,4-tetrahydronaphthalen-2-yl)indolin-2-one (3mb)

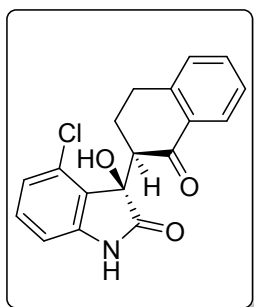

The title compound was prepared according to the general working procedure and purified by flash column chromatography (petroleum ether / ethyl acetate = 2:1) to give the product as a white solid: 89% yield, 29.1 mg, mp = 183-185 °C;  $[\alpha]_D^{20}$  +221.1 ( $c$  = 0.86,  $\text{CHCl}_3$ , 91% *ee*); HPLC: Daicel Chiralpak AD-H, hexane: 2-propanol = 70:30, flow rate = 1.0 mL/min, T = 23°C, UV = 254 nm,  $t_R$  = 8.5 min (minor),  $t_R$  = 57.6 min (major);  $^1\text{H NMR}$  (400 MHz,  $\text{CD}_3\text{OD}$ ):  $\delta$  7.68-7.63 (d,  $J$  = 7.8 Hz, 1H), 7.41-7.38 (t,  $J$  = 7.2 Hz, 1H), 7.23-7.21 (d,  $J$  = 7.6 Hz, 1H), 7.17-7.09 (m, 2H), 6.82-6.80 (d,  $J$  = 8.1 Hz, 1H), 6.76-6.74 (d,  $J$  = 7.7 Hz, 1H), 3.99-3.95 (dd,  $J_1$  = 13.7 Hz,  $J_2$  = 4.1 Hz, 1H), 3.02-2.99 (m, 2H), 2.71-2.64 (m, 1H), 2.48-2.36 (m, 1H);  $^{13}\text{C NMR}$  (100 MHz,  $\text{CD}_3\text{OD}$ ):  $\delta$  198.2, 178.5, 144.5, 144.4, 133.4, 132.4, 130.1, 129.7, 129.1, 128.5, 126.3, 126.1, 122.9, 108.4, 75.5, 52.9, 29.4, 23.4; IR (film,  $\text{v}/\text{cm}^{-1}$ ): 3350, 3205, 2923, 2851, 1979, 1697, 1619, 1593, 1534, 1364, 1317, 1226, 1178, 1123, 935, 907, 889, 822; HRMS (ESI)  $m/z$  calcd for  $\text{C}_{18}\text{H}_{14}\text{ClNO}_3$   $[\text{M}+\text{H}]^+$  328.0740, found 328.0740.

#### (R)-3-hydroxy-1-methyl-3-((R)-1-oxo-1,2,3,4-tetrahydronaphthalen-2-yl)indolin-2-one (3nb)

The title compound was prepared according to the general working procedure and purified by flash

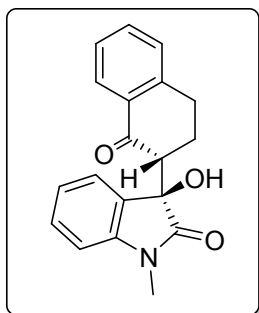

column chromatography (petroleum ether / ethyl acetate = 2:1) to give the product as a yellow oil: 85% yield, 26.1 mg;  $[\alpha]_{\text{D}}^{20} +108.1$  ( $c = 0.55$ ,  $\text{CHCl}_3$ , 98% *ee*); HPLC: Daicel Chiralpak AD-H, hexane: 2-propanol = 70:30, flow rate = 1.0 mL/min,  $T = 23^\circ\text{C}$ , UV = 240 nm,  $t_{\text{R}} = 6.4$  min (minor),  $t_{\text{R}} = 7.8$  min (major);  $^1\text{H NMR}$  (400 MHz,  $\text{CD}_3\text{OD}$ ):  $\delta$  7.96-7.94 (dd,  $J_1 = 7.8$  Hz,  $J_2 = 1.0$  Hz, 1H), 7.58-7.54 (m, 1H), 7.40-7.34 (m, 1H), 7.40-7.34 (m, 4H), 7.08-7.06 (m, 2H), 3.51-3.46 (m, 1H), 3.29 (s, 3H), 3.19-3.12 (m, 1H), 3.02-2.96 (m, 1H), 2.37-2.31 (m, 1H), 1.97-1.86 (m, 1H);  $^{13}\text{C NMR}$  (100 MHz,  $\text{CDCl}_3$ ):  $\delta$  201.9, 176.6, 144.3, 143.8, 134.5, 132.2, 129.7, 129.4, 128.7, 127.4, 126.9, 124.6, 123.3, 108.4, 78.7, 51.9, 28.5, 26.2, 24.6; IR (film,  $\text{v}/\text{cm}^{-1}$ ): 3403, 3056, 2920, 2849, 2519, 2360, 2068, 1708, 1681, 1610, 1597, 1428, 1376, 1353, 1320, 1221, 1156, 1118, 893, 792; HRMS (ESI)  $m/z$  calcd for  $\text{C}_{18}\text{H}_{17}\text{NO}_3$   $[\text{M}+\text{H}]^+$  308.1287, found 308.128.

### (R)-1-allyl-3-hydroxy-3-((R)-1-oxo-1,2,3,4-tetrahydronaphthalen-2-yl)indolin-2-one (3ob)

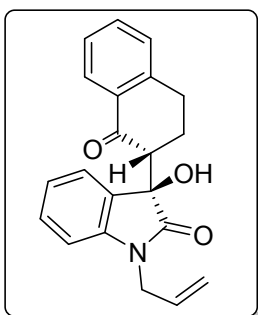

The title compound was prepared according to the general working procedure and purified by flash column chromatography (petroleum ether / ethyl acetate = 2:1) to give the product as a yellow oil: 88% yield, 29.3 mg;  $[\alpha]_{\text{D}}^{20} +95.8$  ( $c = 0.38$ ,  $\text{CHCl}_3$ , 97% *ee*); HPLC: Daicel Chiralpak AD-H, hexane: 2-propanol = 70:30, flow rate = 1.0 mL/min,  $T = 23^\circ\text{C}$ , UV = 240 nm,  $t_{\text{R}} = 7.9$  min (minor),  $t_{\text{R}} = 9.3$  min (major);  $^1\text{H NMR}$  (400 MHz,  $\text{CD}_3\text{OD}$ ):  $\delta$  7.87-7.85 (dd,  $J_1 = 7.8$  Hz,  $J_2 = 1.1$  Hz, 1H), 7.49-7.45 (td,  $J_1 = 7.4$  Hz,  $J_2 = 1.4$  Hz, 1H), 7.31-7.23 (m, 4H), 7.0-6.93 (m, 3H), 5.90-5.83 (m, 1H), 5.38-5.33 (m, 1H), 5.23-5.20 (m, 1H), 4.42-4.28 (m, 2H), 3.44-3.40 (dd,  $J_1 = 13.4$  Hz,  $J_2 = 4.2$  Hz, 1H), 3.09-3.0 (m, 1H), 2.93-2.87 (dt,  $J_1 = 16.6$  Hz,  $J_2 = 3.8$  Hz, 1H), 2.34-2.28 (m, 1H), 1.94-1.83 (m, 1H);  $^{13}\text{C NMR}$  (100 MHz,  $\text{CD}_3\text{OD}$ ):  $\delta$  198.9, 176.4, 144.3, 143.1, 133.7, 132.5, 131.2, 131.0, 129.1, 128.5, 126.5, 126.3, 123.4, 122.6, 116.5, 109.3, 76.0, 53.8, 41.7, 28.6, 24.3; IR (film,  $\text{v}/\text{cm}^{-1}$ ): 3387, 3057, 2920, 2520, 1713, 1681, 1610, 1597, 1487, 1357, 1303, 1181, 1102, 988, 929, 809, 792; HRMS (ESI)  $m/z$  calcd for  $\text{C}_{21}\text{H}_{19}\text{NO}_3$   $[\text{M}+\text{H}]^+$  334.1443, found 334.1438.

### (R)-3-hydroxy-3-((R)-1-oxo-1,2,3,4-tetrahydronaphthalen-2-yl)-1-phenylindolin-2-one (3pb)

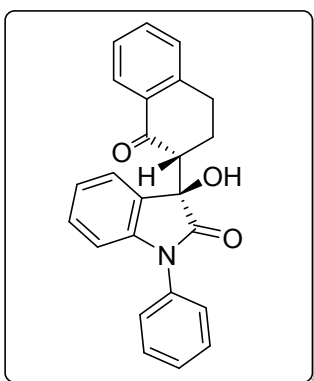

The title compound was prepared according to the general working procedure and purified by flash column chromatography (petroleum ether / ethyl acetate = 2:1) to give the product as a yellow oil: 91% yield, 33.6 mg;  $[\alpha]_{\text{D}}^{20} +141.3$  ( $c = 0.98$ ,  $\text{CHCl}_3$ , 99% *ee*); HPLC: Daicel Chiralpak AD-H, hexane: 2-propanol = 70:30, flow rate = 1.0 mL/min,  $T = 23^\circ\text{C}$ , UV = 240 nm,  $t_{\text{R}} = 9.2$  min (minor),  $t_{\text{R}} = 15.2$  min (major);  $^1\text{H NMR}$  (400 MHz,  $\text{CD}_3\text{OD}$ ):  $\delta$  7.86-7.83 (m, 1H), 7.58-7.54 (m, 2H), 7.49-7.44 (m, 4H), 7.39-7.37 (dd,  $J_1 = 7.4$  Hz,  $J_2 = 0.8$  Hz, 1H), 7.28-7.21 (m, 3H), 7.06-7.02 (td,  $J_1 = 7.5$  Hz,  $J_2 = 0.9$  Hz, 1H), 6.74-6.72 (d,  $J = 7.8$  Hz, 1H), 3.56-3.52 (m, 1H), 3.14-3.07 (m, 1H), 3.03-2.97 (dt,  $J_1 = 16.2$  Hz,  $J_2 = 3.9$  Hz, 1H), 2.60-2.53 (m, 1H), 2.20-2.09 (m, 1H);  $^{13}\text{C NMR}$  (100 MHz,  $\text{CDCl}_3$ ):  $\delta$  201.8, 174.0, 144.3, 143.8, 134.6, 133.9, 132.2, 129.7, 129.6,

129.3, 128.8, 128.3, 127.5, 127.0, 126.4, 124.9, 123.8, 109.8, 78.8, 52.4, 28.6, 24.7; IR (film,  $\nu/\text{cm}^{-1}$ ): 3404, 3062, 2923, 2851, 2516, 1721, 1679, 1610, 1595, 1498, 1480, 1465, 1454, 1359, 1321, 1298, 1176, 1156, 1103, 1050, 893, 839; HRMS (ESI)  $m/z$  calcd for  $\text{C}_{24}\text{H}_{19}\text{NO}_3$   $[\text{M}+\text{H}]^+$  370.1443, found 370.1445.

### (R)-1-benzyl-3-hydroxy-3-(2-oxo-2-phenylethyl)indolin-2-one (3qc)

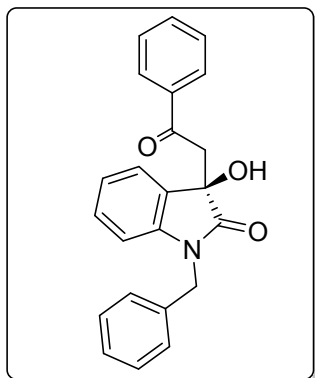

The title compound was prepared according to the general working procedure and purified by flash column chromatography (petroleum ether / ethyl acetate = 2:1) to give the product as a white solid: 91% yield, 32.5 mg, mp = 161-164 °C;  $[\alpha]_{\text{D}}^{20}$  +66.5 ( $c = 0.73$ ,  $\text{CHCl}_3$ , 95% *ee*); HPLC: Daicel Chiralpak AD-H, hexane: 2-propanol = 70:30, flow rate = 1.0 mL/min,  $T = 23^\circ\text{C}$ , UV = 240 nm,  $t_{\text{R}} = 9.8$  min (minor),  $t_{\text{R}} = 17.3$  min (major);  $^1\text{H}$  NMR (400 MHz,  $\text{CD}_3\text{OD}$ ):  $\delta$  7.81-7.79 (d,  $J = 7.4$  Hz, 1H), 7.49-7.46 (m, 1H), 7.40-7.33 (m, 3H), 7.25-7.22 (t,  $J = 7.6$  Hz, 1H), 7.18-7.14 (t,  $J = 7.2$  Hz, 1H), 7.08-7.04 (t,  $J = 7.6$  Hz, 1H), 6.88-6.84 (t,  $J = 7.4$  Hz, 1H), 6.66-6.64 (d,  $J = 7.8$  Hz, 1H), 4.87 (s, 2H), 4.07-4.03 (d,  $J = 17.4$  Hz, 1H), 3.74-3.69 (d,  $J = 17.4$  Hz, 1H);  $^{13}\text{C}$  NMR (100 MHz,  $\text{CD}_3\text{OD}$ ):  $\delta$  196.7, 178.1, 143.4, 136.3, 135.9, 133.2, 130.5, 129.1, 128.36, 128.30, 127.7, 127.1, 127.0, 122.9, 122.5, 109.4, 73.4, 45.5, 43.3; IR (film,  $\nu/\text{cm}^{-1}$ ): 3028, 2455, 1694, 1673, 1609, 1578, 1487, 1464, 1447, 1388, 1372, 1345, 1297, 1261, 1212, 1179, 1132, 1115, 1091, 1054, 1003, 946, 817, 733; HRMS (ESI)  $m/z$  calcd for  $\text{C}_{23}\text{H}_{19}\text{NO}_3$   $[\text{M}+\text{H}]^+$  358.1443, found 358.1440.

### (3R)-3-hydroxy-3-(1-oxo-1-phenylpropan-2-yl)indolin-2-one (3aa)

The title compound was prepared according to the general working procedure and purified by flash

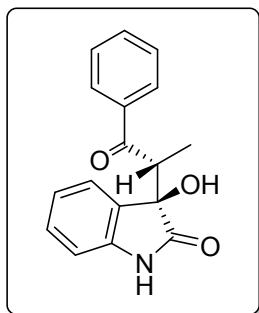

column chromatography (petroleum ether / ethyl acetate = 2:1) to give the product as a white solid: 91% yield, 28.0 mg, mp = 147-150 °C;  $[\alpha]_{\text{D}}^{20}$  +34.0 ( $c = 0.60$ ,  $\text{CHCl}_3$ , 91% *ee*); HPLC: Daicel Chiralpak AD-H, hexane: 2-propanol = 70:30, flow rate = 1.0 mL/min,  $T = 23^\circ\text{C}$ , UV = 230 nm,  $t_{\text{R}} = 30.0$  min (minor),  $t_{\text{R}} = 41.4$  min (major);  $^1\text{H}$  NMR (400 MHz,  $\text{CD}_3\text{OD}$ ):  $\delta$  8.02-8.00 (m, 2H), 7.59-7.54 (m, 1H), 7.48-7.44 (m, 2H), 7.42-7.39 (m, 1H), 7.21-7.17 (td,  $J_1 = 7.7$  Hz,  $J_2 = 1.2$  Hz, 1H), 6.95-6.91 (td,  $J_1 = 7.6$  Hz,  $J_2 = 1.0$  Hz, 1H), 6.85-6.83 (m, 1H), 4.37-4.32 (m, 1H), 1.14-1.13 (d,  $J = 7.0$  Hz, 3H);  $^{13}\text{C}$  NMR (100 MHz,  $\text{CD}_3\text{OD}$ ):  $\delta$  202.0, 179.8, 142.0, 137.5, 132.8, 129.7, 129.2, 128.3, 128.2, 125.3, 121.8, 109.5, 76.9, 46.4, 11.3; IR (film,  $\nu/\text{cm}^{-1}$ ): 2917, 2848, 1727, 1667, 1618, 1598, 1518, 1455, 1518, 1455, 1331, 1217, 1148, 1154, 1122, 1091, 1069, 999, 911, 843, 788, 746; HRMS (ESI)  $m/z$  calcd for  $\text{C}_{17}\text{H}_{15}\text{NO}_3$   $[\text{M}+\text{Na}]^+$  304.0950, found 304.0947.

### (R)-3-hydroxy-3-((R)-5-oxo-6,7,8,9-tetrahydro-5H-benzo[7]annulen-6-yl)indolin-2-one (3ad)

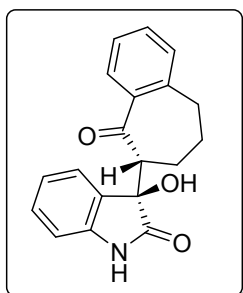

The title compound was prepared according to the general working procedure and purified by flash column chromatography (petroleum ether / ethyl acetate = 2:1) to give the product as a yellow oil: 85% yield, 26.1

mg, mp = 147-150 °C;  $[\alpha]_D^{20} +51.6$  (c = 0.67, CHCl<sub>3</sub>, 95% ee); HPLC: Daicel Chiralpak AD-H, hexane: 2-propanol = 70:30, flow rate = 1.0 mL/min, T = 23°C, UV = 254 nm,  $t_R$  = 15.1 min (minor),  $t_R$  = 17.1 min (major); <sup>1</sup>H NMR (400 MHz, CD<sub>3</sub>OD): δ 7.49-7.47 (d,  $J$  = 7.4 Hz, 1H), 7.41-7.37 (t,  $J$  = 7.5 Hz, 2H), 7.28-7.26 (d,  $J$  = 7.4 Hz, 1H), 7.24-7.20 (t,  $J$  = 7.6 Hz, 2H), 6.97-6.93 (t,  $J$  = 7.5 Hz, 1H), 6.90-6.86 (m, 1H), 3.78-3.73 (dd,  $J_1$  = 11.6 Hz,  $J_2$  = 5.6 Hz, 1H), 3.14-3.07 (m, 1H), 3.02-2.95 (m, 1H), 2.16-2.09 (m, 1H), 2.07-1.99 (m, 1H), 1.96-1.88 (m, 1H), 1.61-1.53 (m, 1H); <sup>13</sup>C NMR (100 MHz, CD<sub>3</sub>OH): δ 204.3, 179.3, 142.5, 139.5, 131.4, 129.8, 129.1, 127.4, 125.9, 124.7, 121.9, 109.6, 76.1, 56.5, 32.9, 25.2, 23.9; IR (film, v/cm<sup>-1</sup>): 3357, 2917, 2849, 1720, 1618, 1459, 1259, 1208, 1016, 872, 799, 753, 695; HRMS (ESI) m/z calcd for C<sub>19</sub>H<sub>17</sub>NO<sub>3</sub> [M+H]<sup>+</sup> 308.1287, found 308.1284.

### (R)-3-hydroxy-3-((R)-2-oxocyclohexyl)indolin-2-one (3ae)

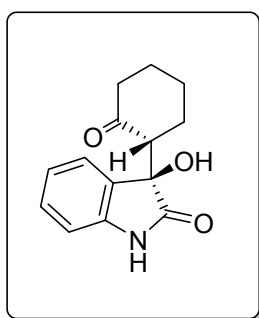

The title compound was prepared according to the general working procedure and purified by flash column chromatography (petroleum ether / ethyl acetate = 2:1) to give the product as a yellow oil: 83% yield, 20.3 mg;  $[\alpha]_D^{20} +17.2$  (c = 0.22, CHCl<sub>3</sub>, 97% ee); HPLC: Daicel Chiralpak AD-H, hexane: 2-propanol = 70:30, flow rate = 1.0 mL/min, T = 23°C, UV = 254 nm,  $t_R$  = 7.8 min (minor),  $t_R$  = 8.6 min (major); <sup>1</sup>H NMR (400 MHz, CD<sub>3</sub>OD): δ 7.42-7.40 (m, 1H), 7.22-7.18 (td,  $J_1$  = 7.7 Hz,  $J_2$  = 1.2 Hz, 1H), 6.99-6.95 (td,  $J_1$  = 7.6 Hz,  $J_2$  = 1.0 Hz, 1H), 6.86-6.84 (m, 1H), 3.27-3.22 (m, 1H), 2.46-2.37 (m, 1H), 2.26-2.16 (m, 2H), 2.09-2.04 (m, 1H), 1.87-1.83 (m, 1H), 1.73-1.66 (m, 1H), 1.58-1.49 (m, 2H); <sup>13</sup>C NMR (100 MHz, CDCl<sub>3</sub>): δ 214.1, 177.2, 141.0, 129.8, 129.7, 125.8, 123.2, 110.4, 78.2, 55.5, 42.7, 28.1, 26.7, 24.2; IR (film, v/cm<sup>-1</sup>): 3197, 2919, 2850, 2359, 1706, 1616, 1467, 1338, 1260, 1197, 1158, 1113, 1041, 1019, 942, 872, 796, 749, 667; HRMS (ESI) m/z calcd for C<sub>14</sub>H<sub>15</sub>NO<sub>3</sub> [M+H]<sup>+</sup> 246.1130, found 246.1129.

## 1.6 A Plausible Structure of the Transition State

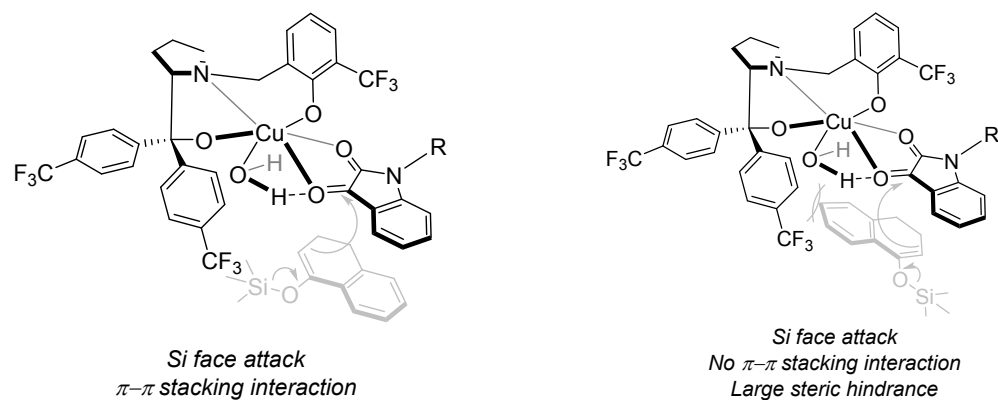

||

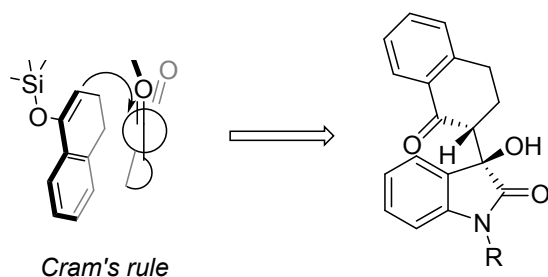

## References:

- (1) (a) Guo, F.; Lai, G.; Xiong, S.; Wang, S.; Wang, Z. *Chem. -Eur. J.* **2010**, *16*, 6438; (b) Zhang, S.; Xu, K.; Guo, F.; Hu, Y.; Zha, Z.; Wang, Z. *Chem. -Eur. J.* **2014**, *20*, 979.
- (2) (a) Mori, K.; Bernotas, R. *Tetradron: Asymmetry*. **1990**, *1*, 87; (b) Cazeau, P.; Duboudin, F.; Moulines, F.; Babot, O.; Dunogues, J. *Tetrahedron*, **1987**, *43*, 2075; (c) Fang, J.; Ren, J.; Wang, Z. -W. *Tetrahedron Letters*, **2008**, *49*, 6659; (d) Khan, I.; Reed-Berendt, B.; Melen, R. L.; Morrill, L. *C. Angew. Chem. Int. Ed.* **2018**, *57*, 12356.
- (3) Li, C.; Guo, F.; Xu, K.; Zhang, S.; Hu, Y.; Zha, Z.; Wang, Z. *Org. Lett.* **2014**, *16*, 3192.

(4) Liu, Z.; Gu, P.; Shi, M.; McDowell, P.; Li, G. *Org. Lett.* **2011**, *13*, 2314.

## Part II $^1\text{H}$ NMR & $^{13}\text{C}$ NMR

$^1\text{H}$  NMR of **3ab**

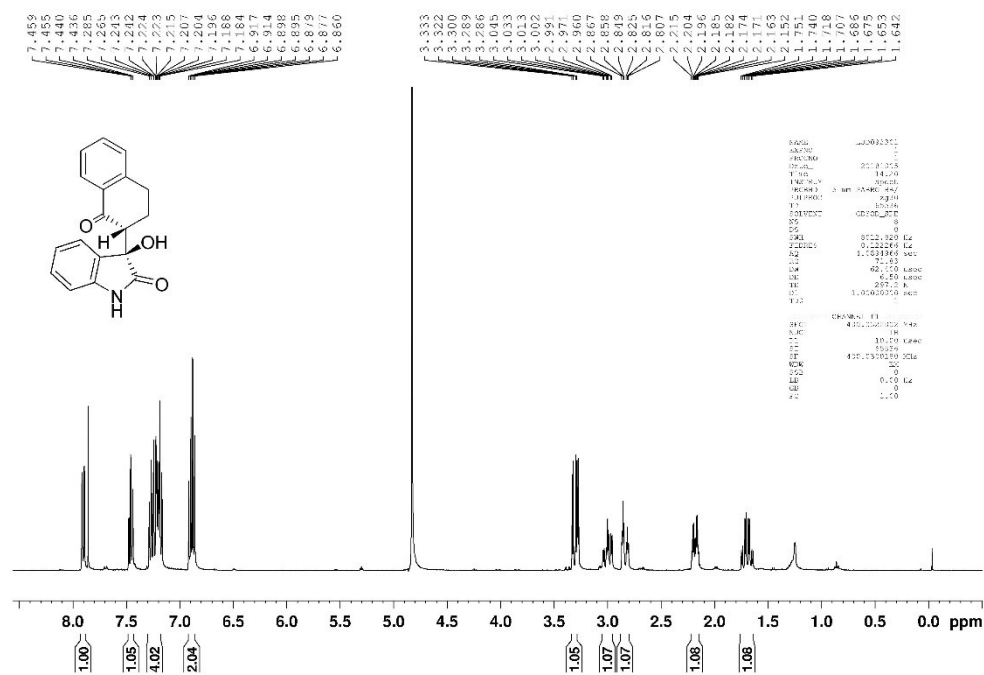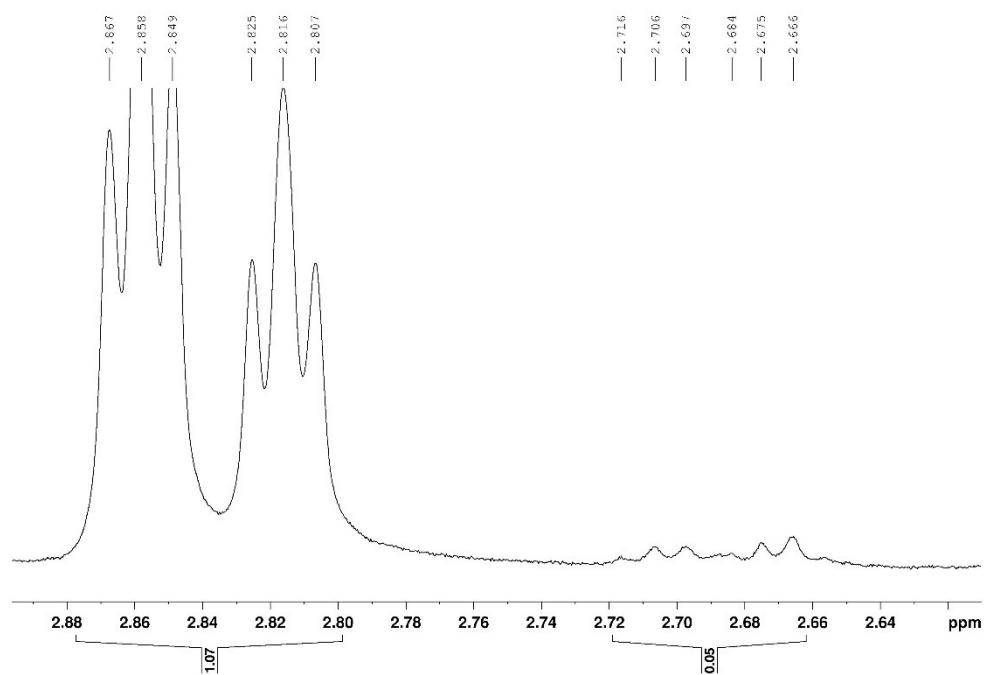

<sup>13</sup>C NMR of **3ab**

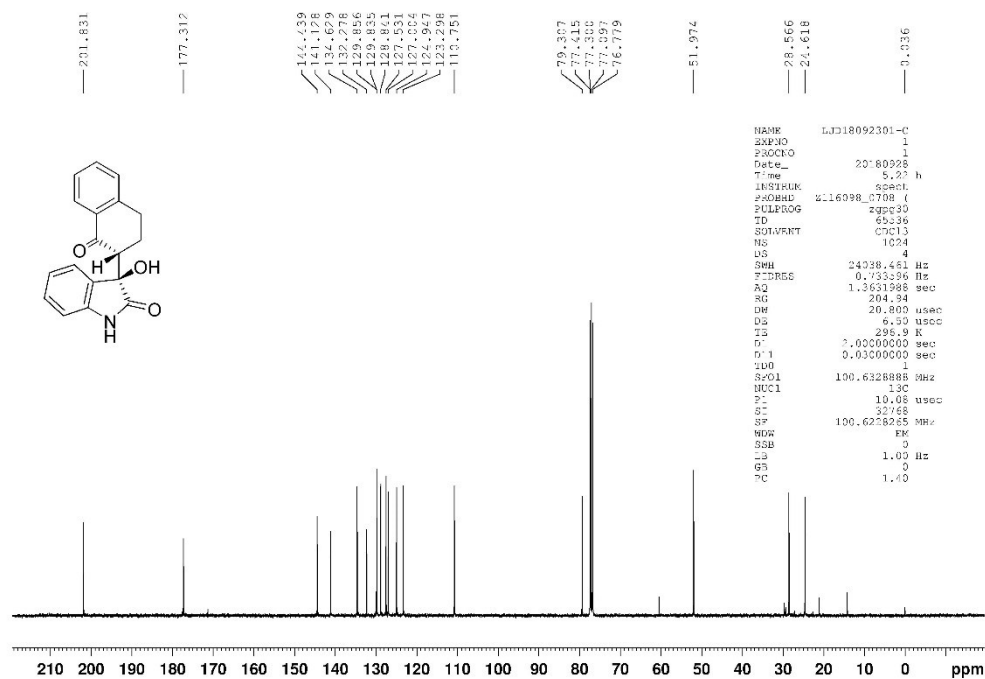

<sup>1</sup>H NMR of **3bb**

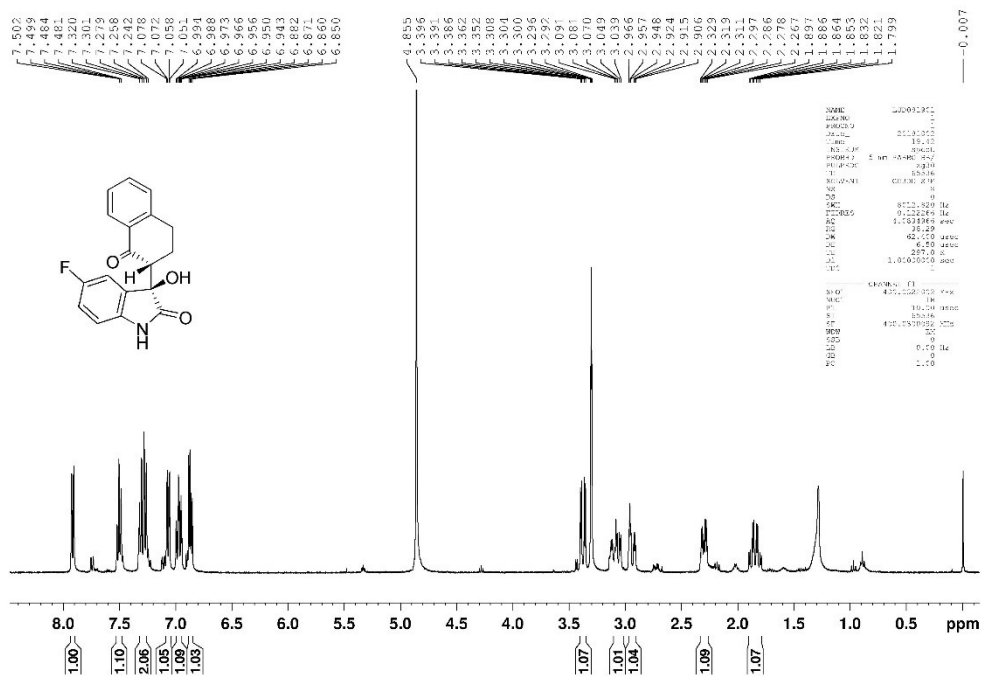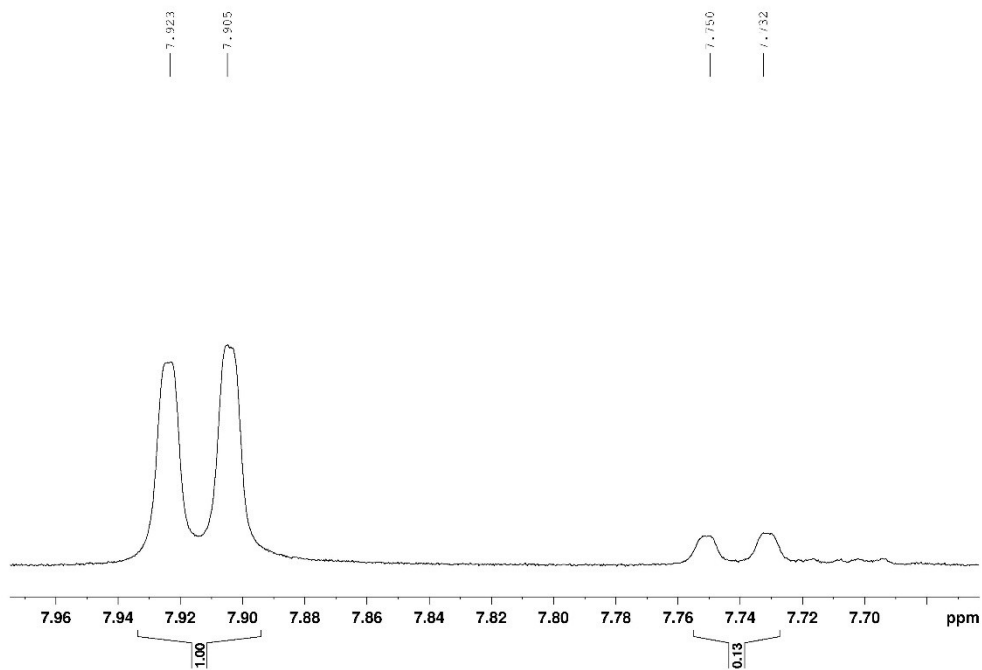

<sup>13</sup>C NMR of **3bb**



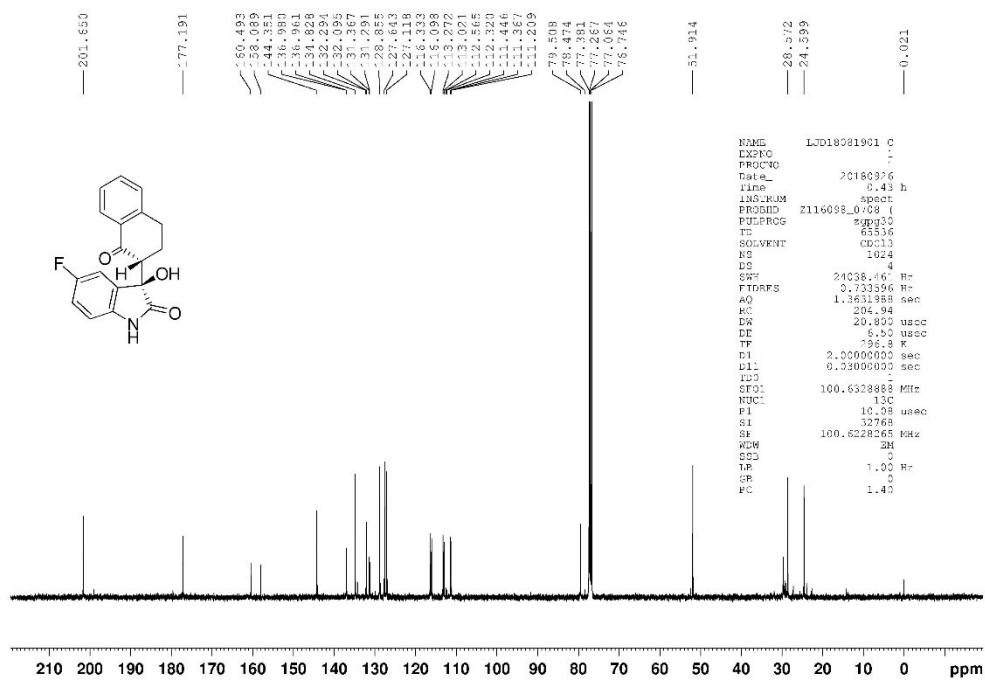

<sup>1</sup>H NMR of **3b**

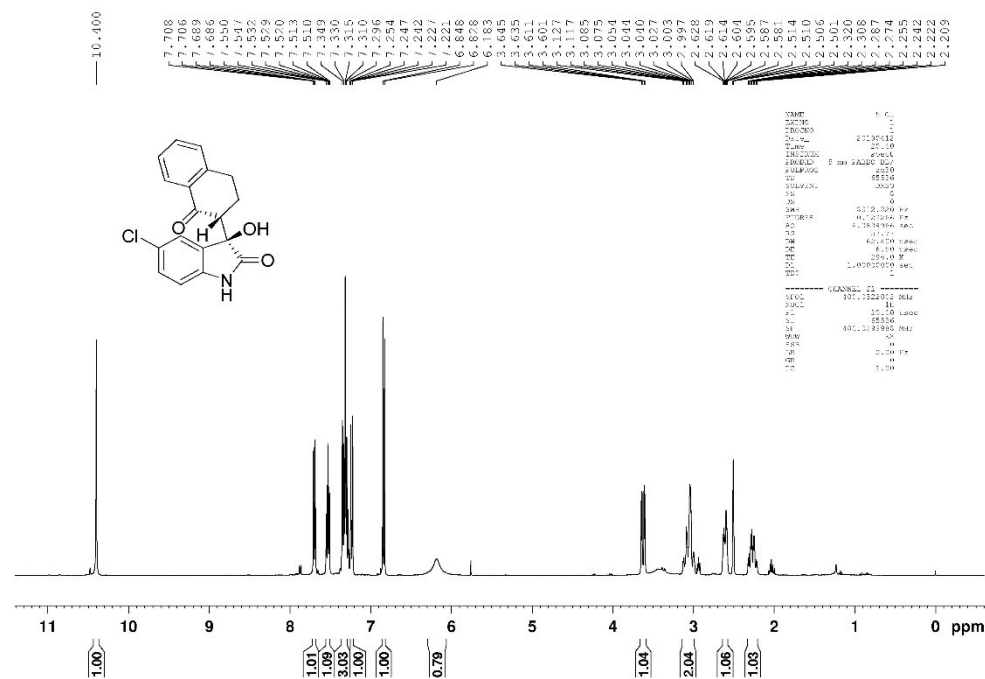

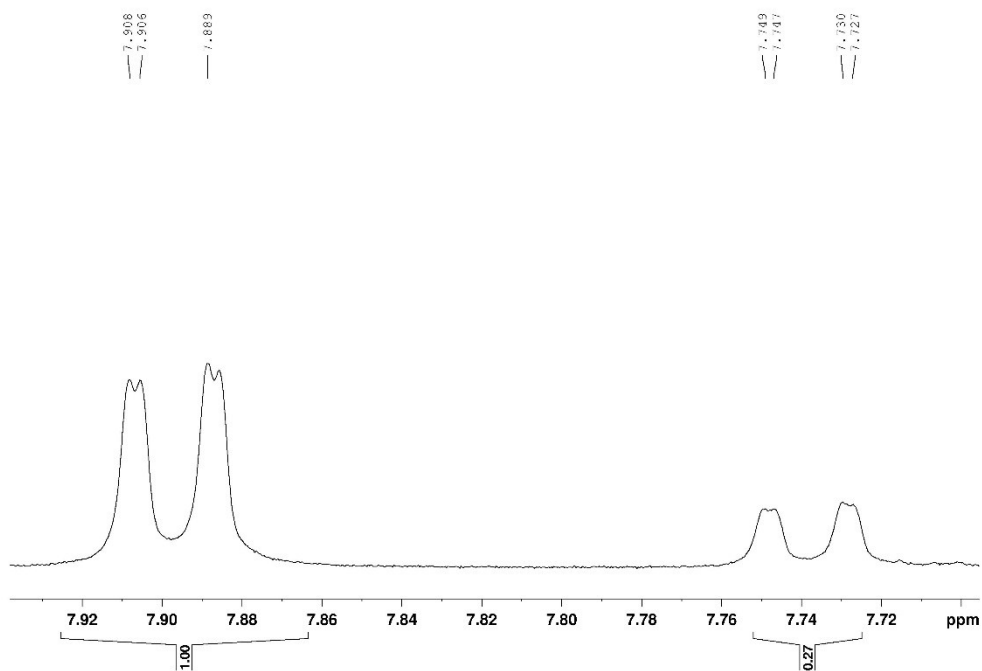

<sup>13</sup>C NMR of 3cb

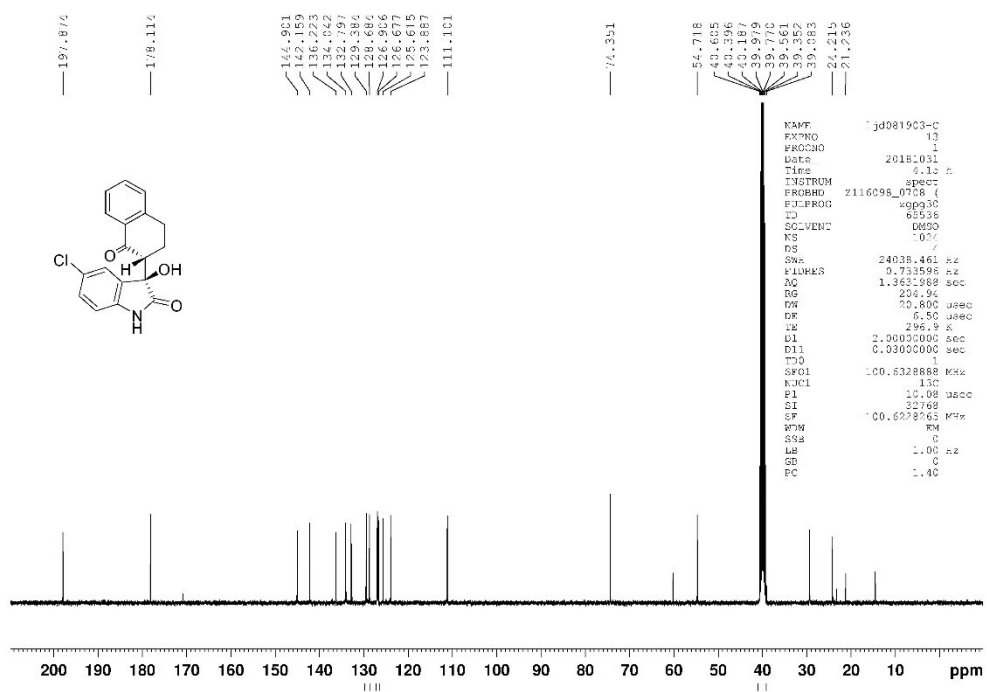

<sup>1</sup>H NMR of **3db**

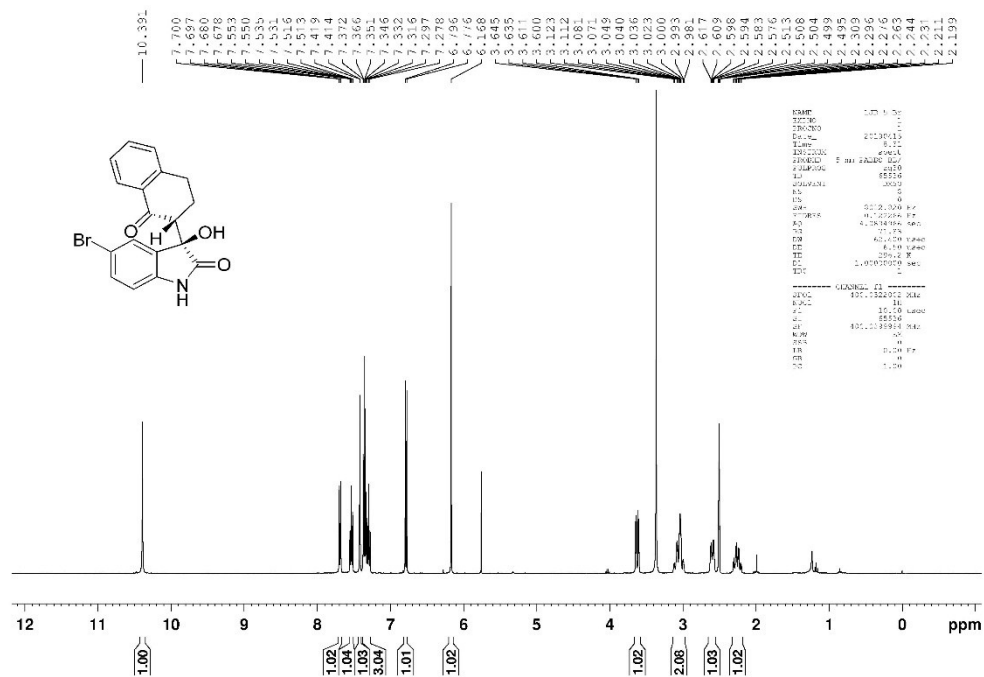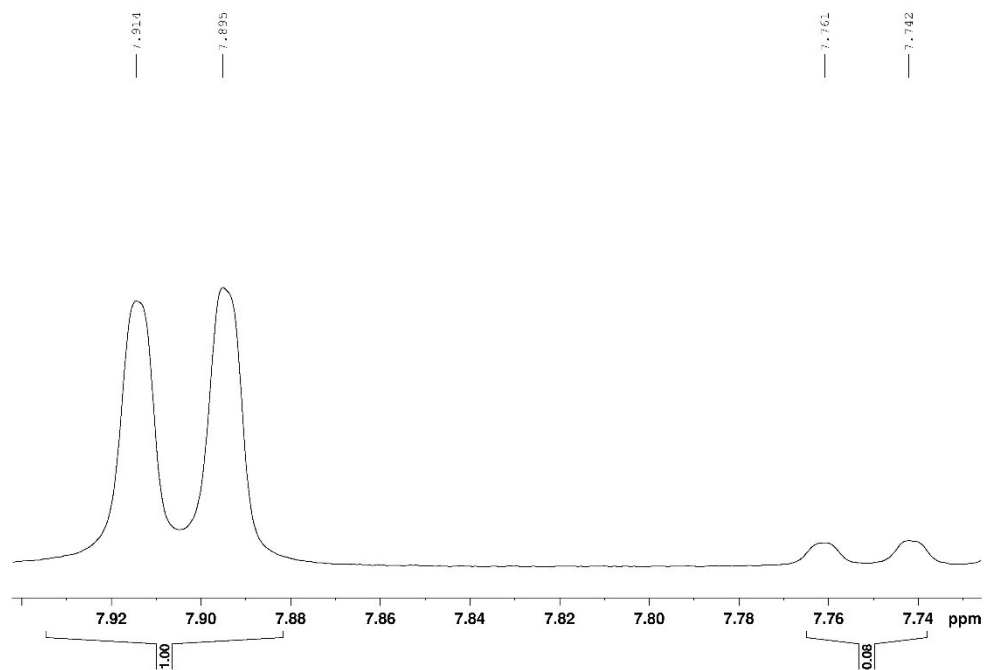

<sup>13</sup>C NMR of **3db**

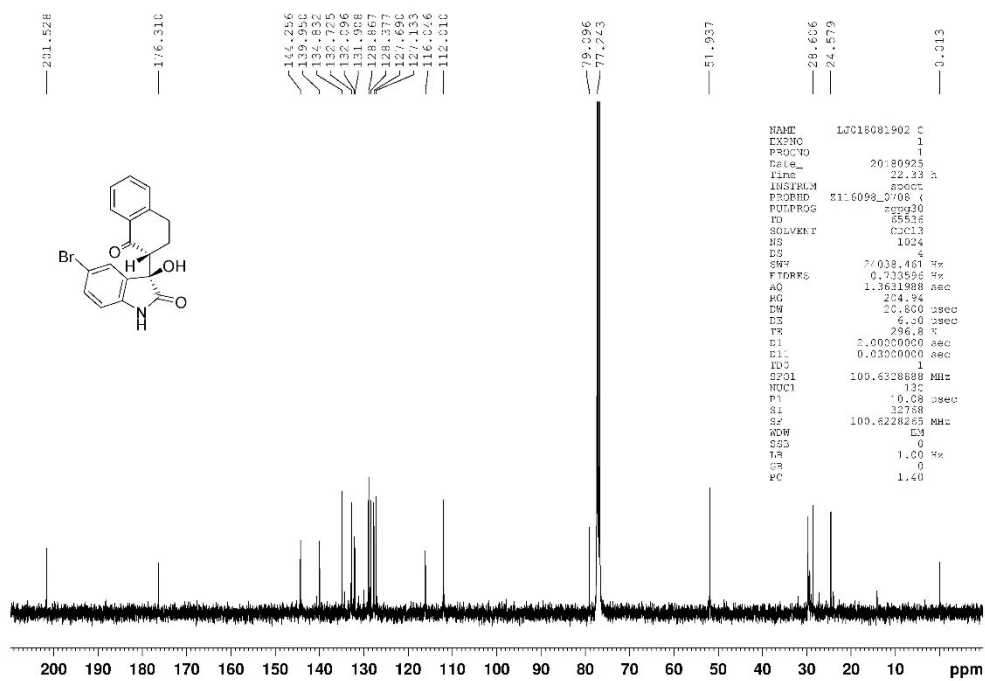

<sup>1</sup>H NMR of **3eb**

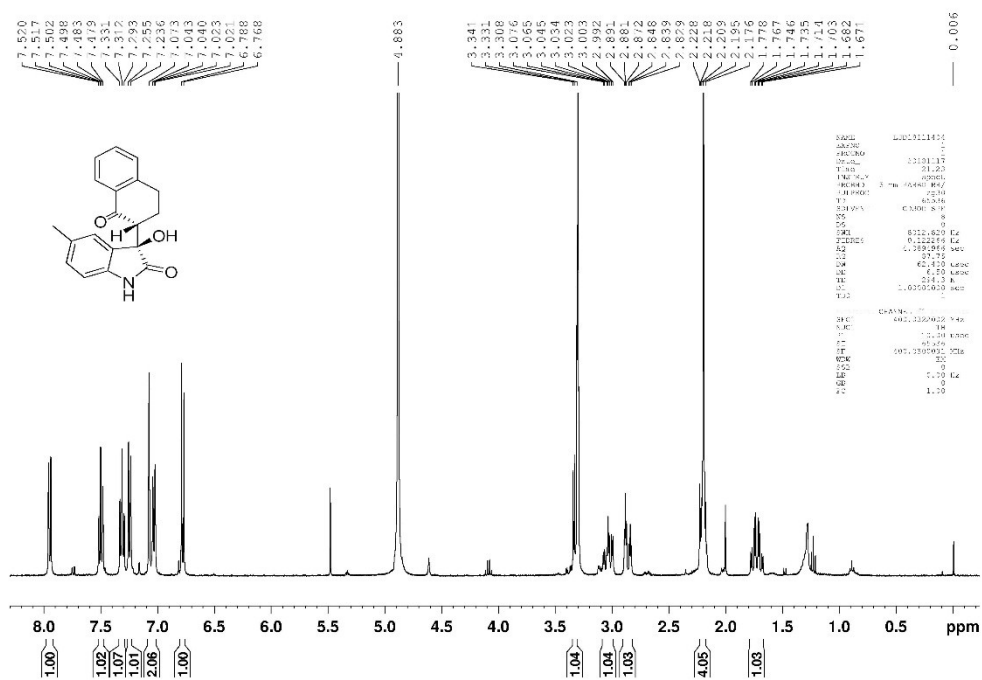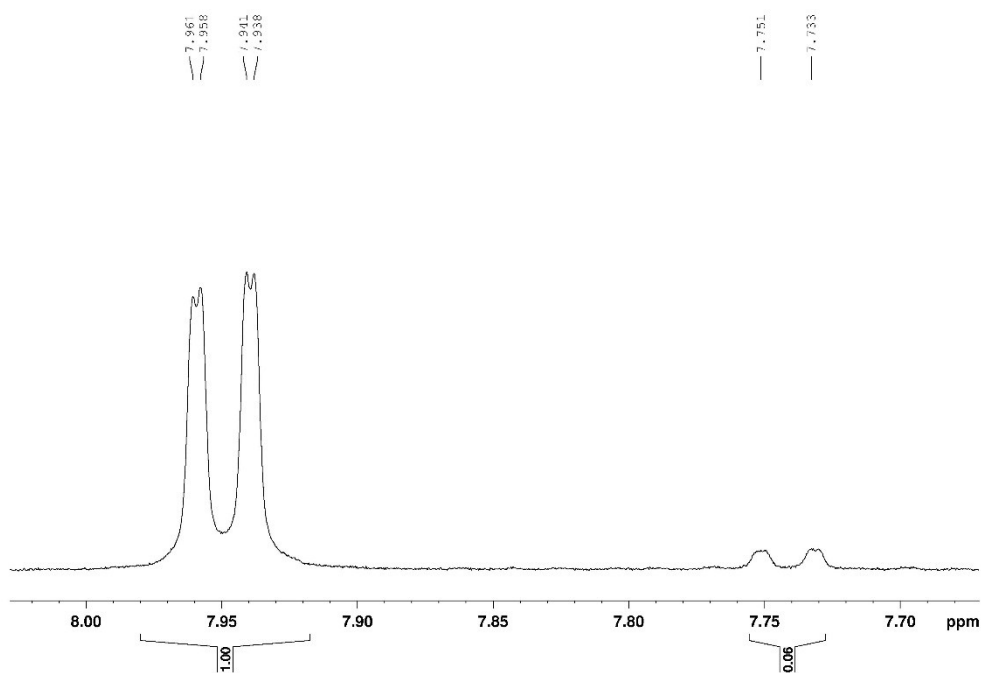

$^{13}\text{C}$  NMR of **3eb**

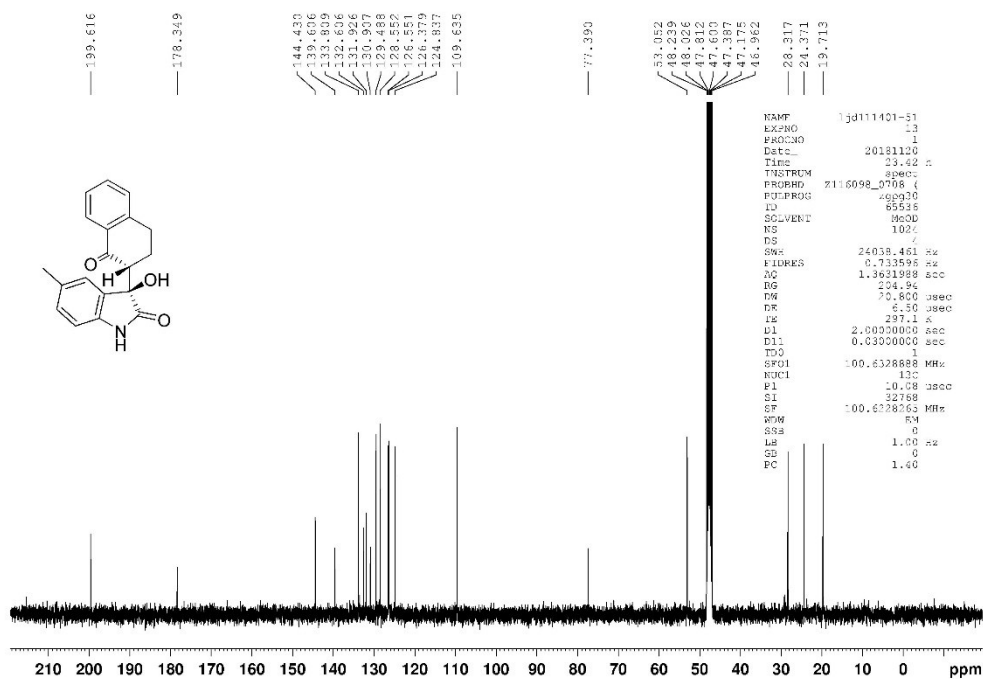

<sup>1</sup>H NMR of **3fb**

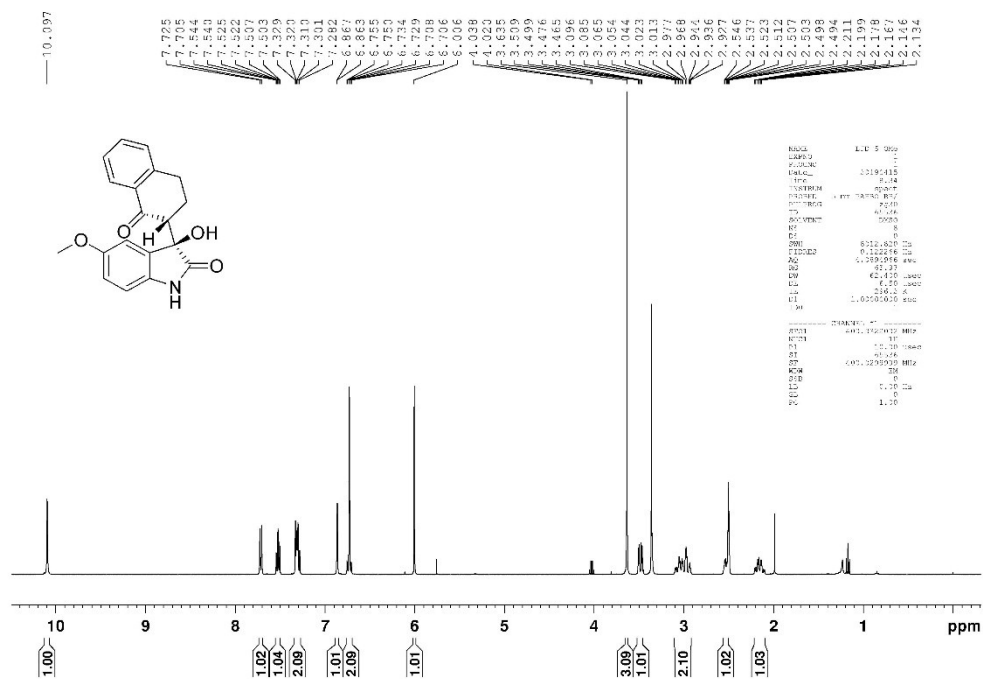

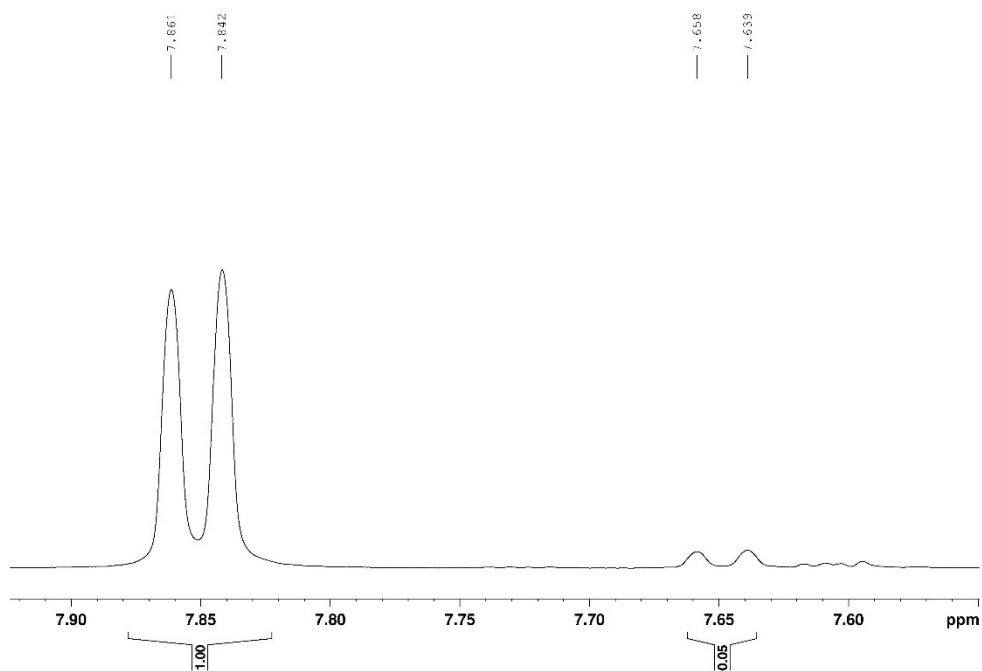

<sup>13</sup>C NMR of **3fb**

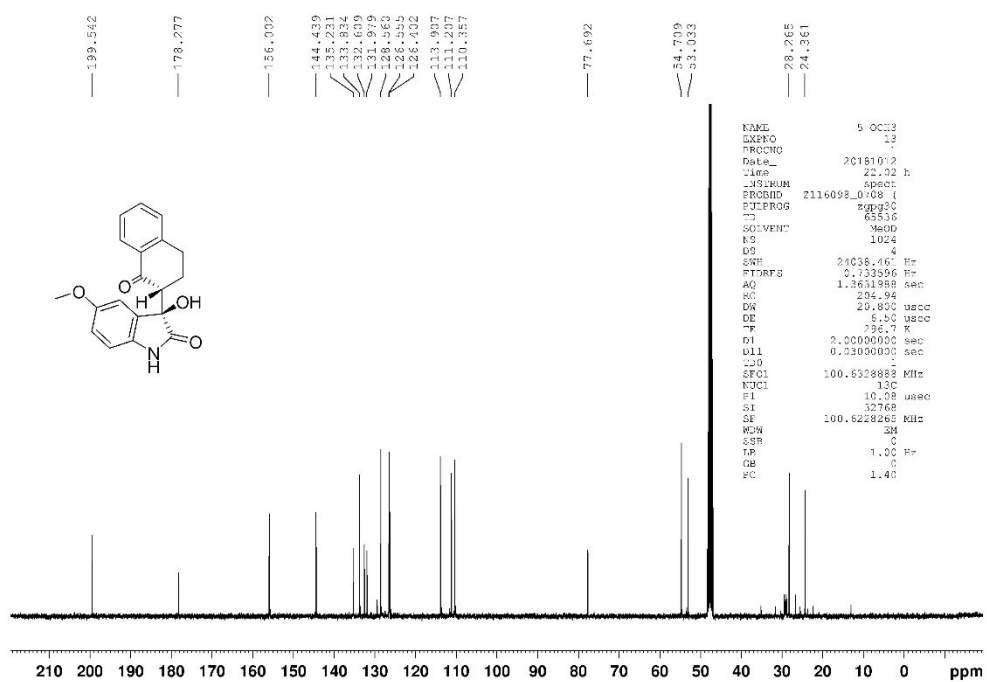

<sup>1</sup>H NMR of **3gb**

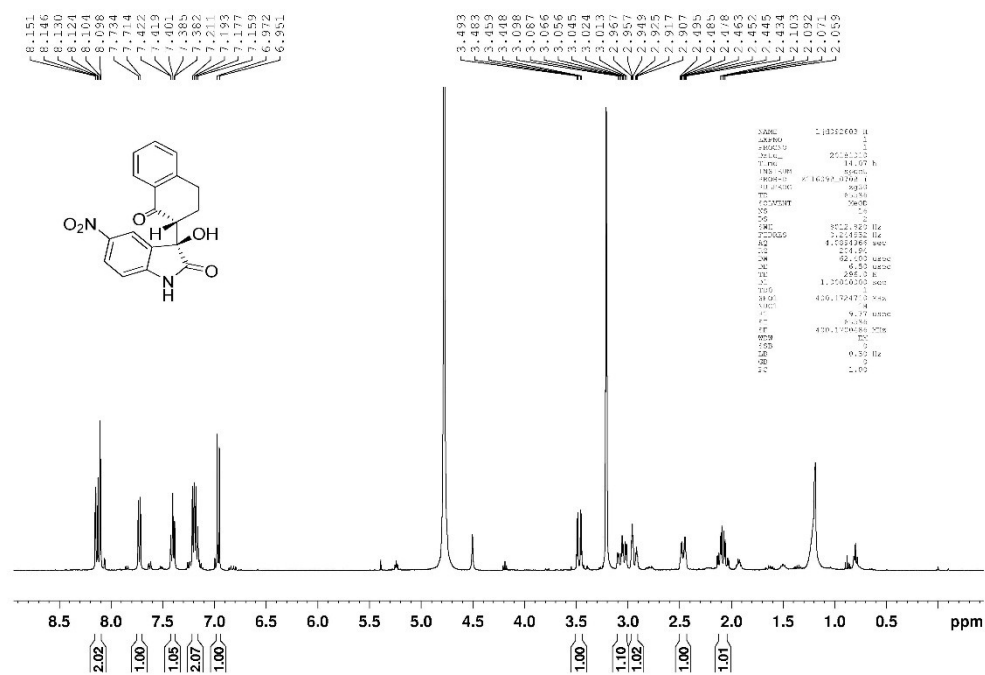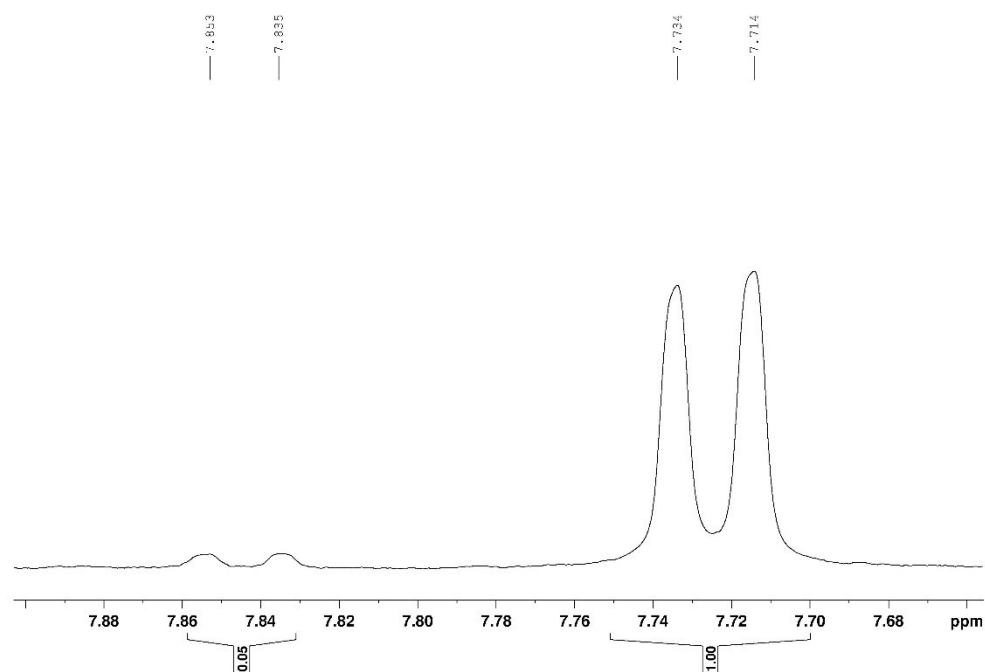



### <sup>13</sup>C NMR of **3gb**

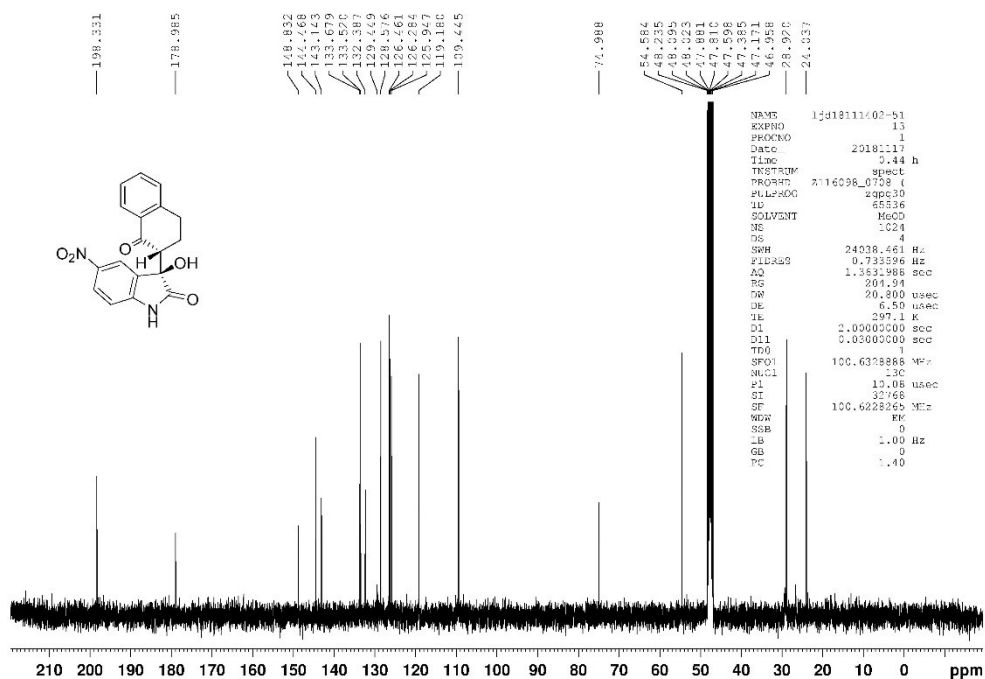

### <sup>1</sup>H NMR of **3hb**

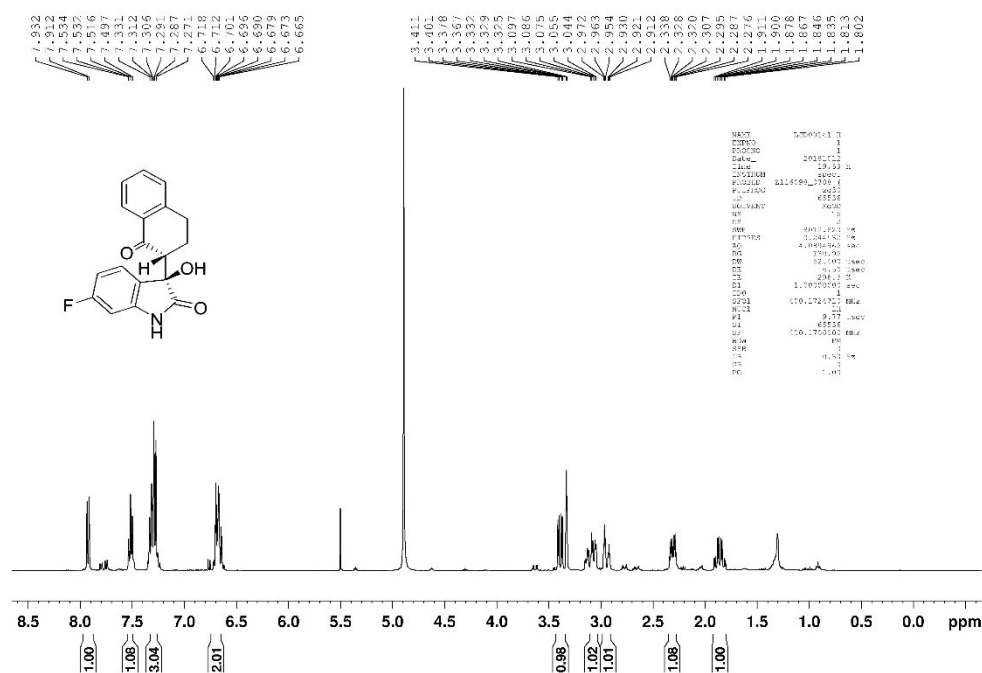

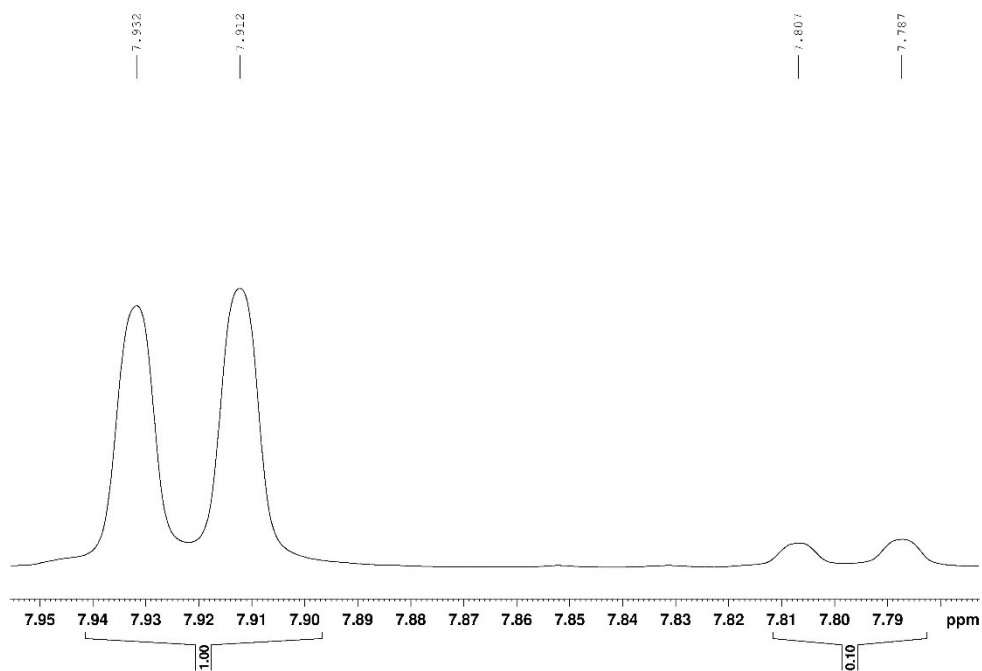

<sup>13</sup>C NMR of **3hb**

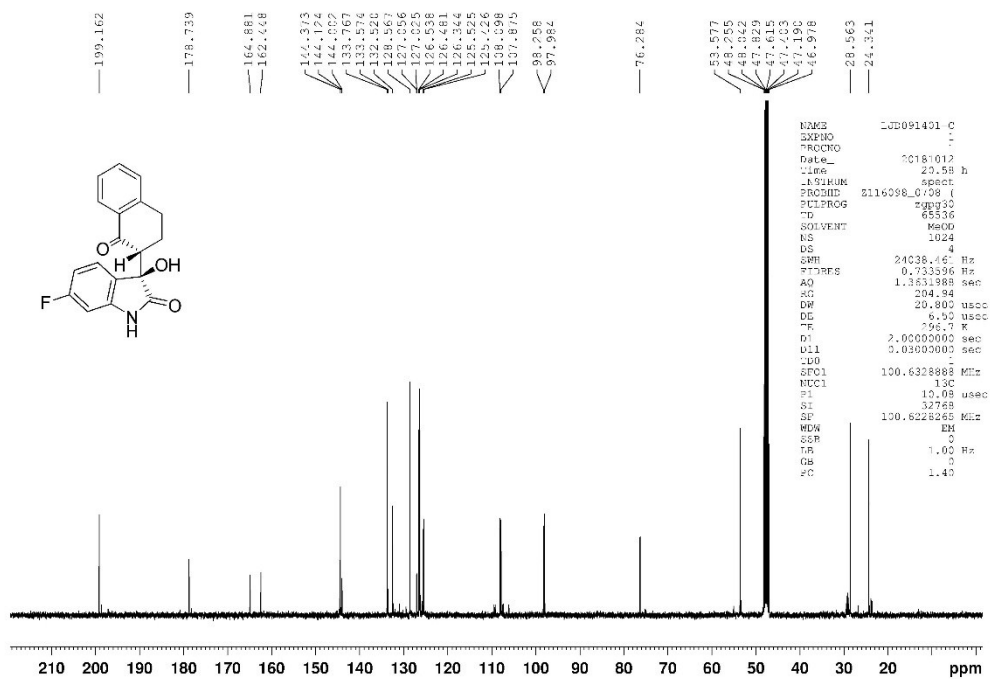

<sup>1</sup>H NMR of **3ib**

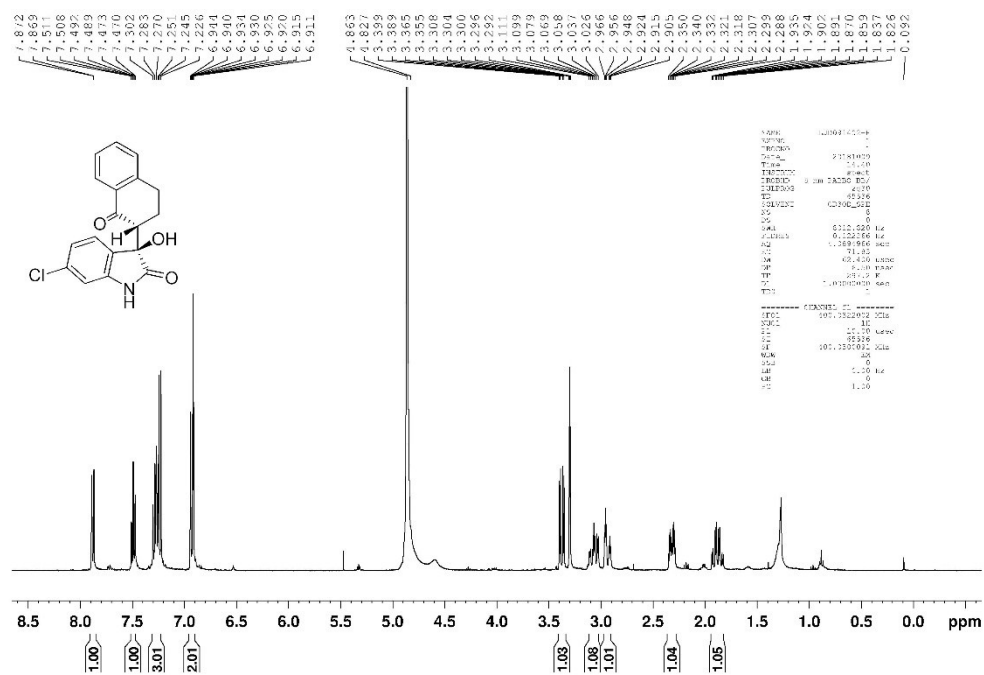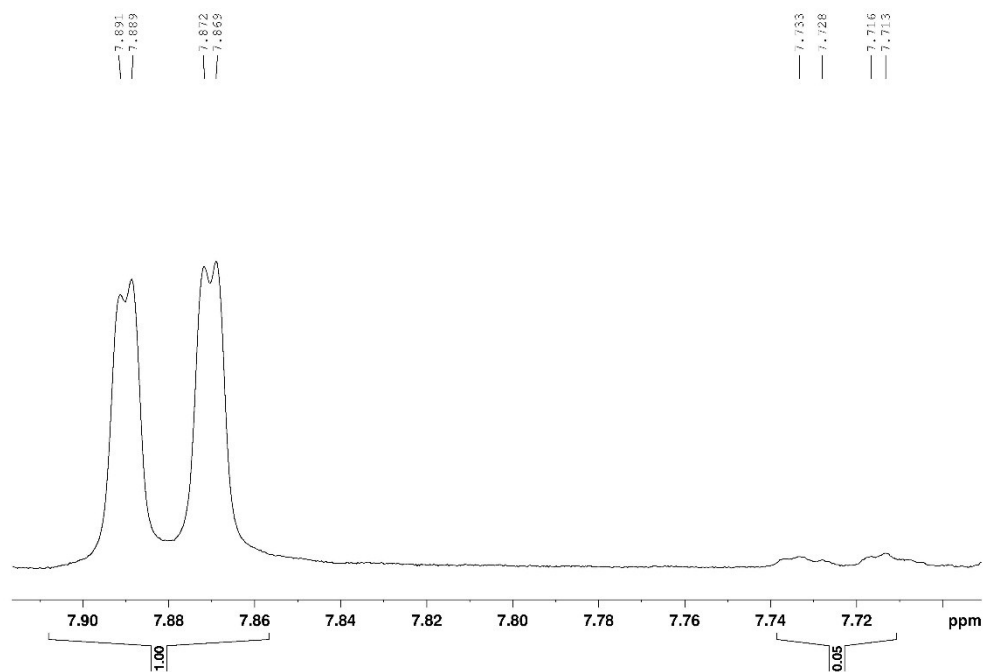

<sup>13</sup>C NMR of **3ib**

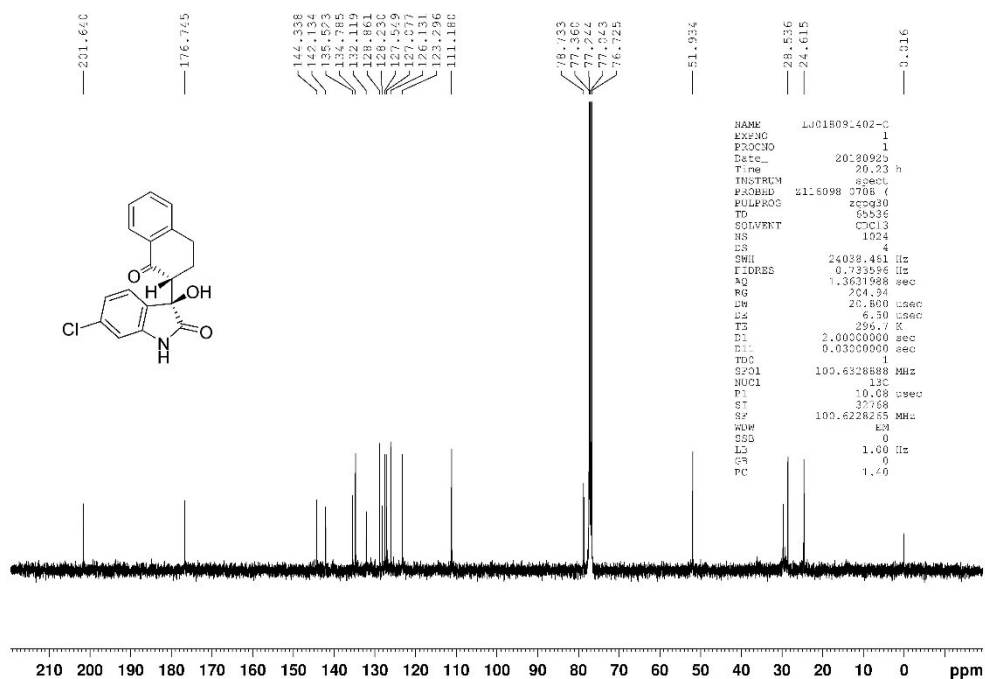

<sup>1</sup>H NMR of **3jb**

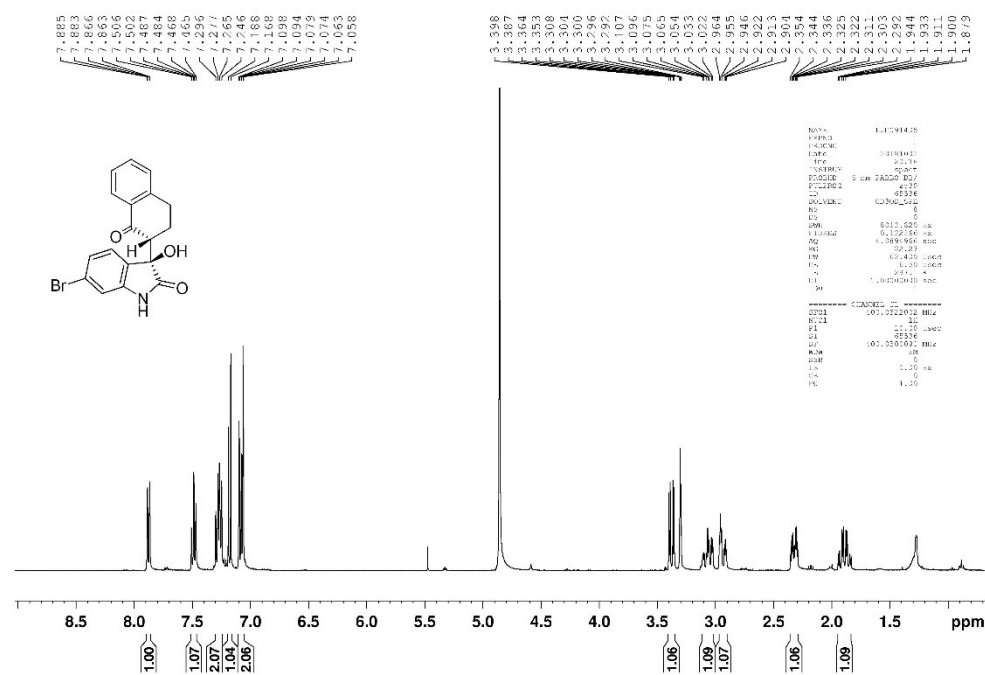

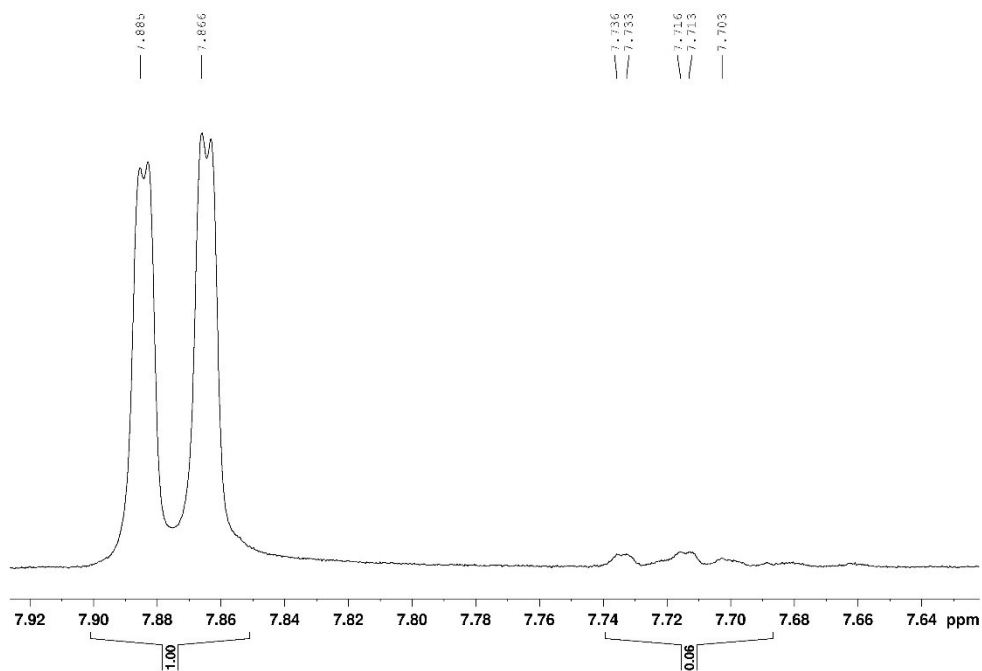

<sup>13</sup>C NMR of 3jb

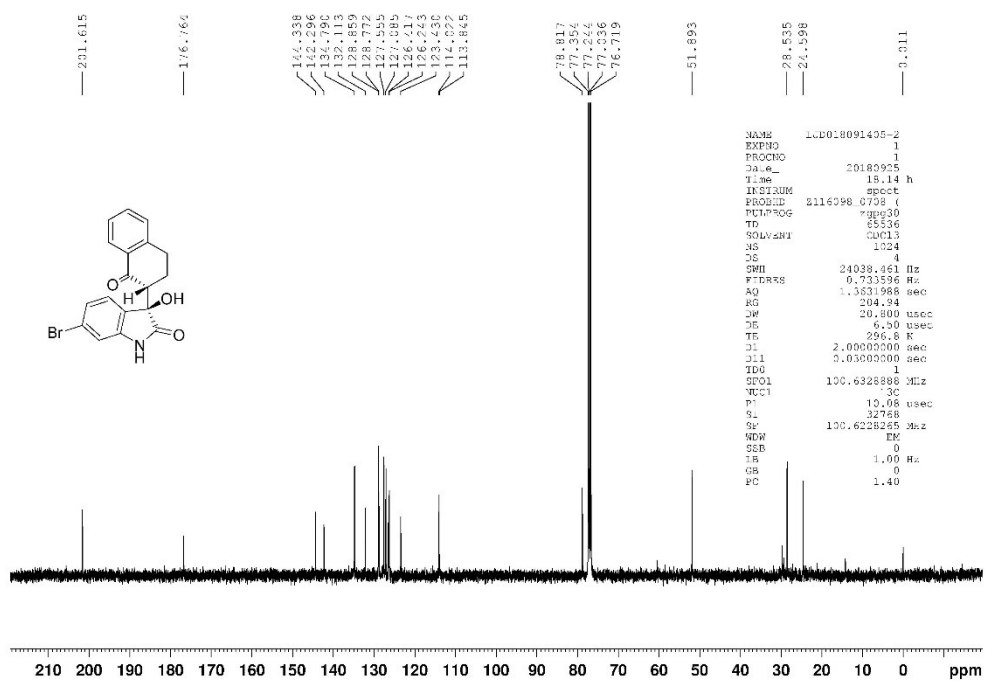

<sup>1</sup>H NMR of **3kb**

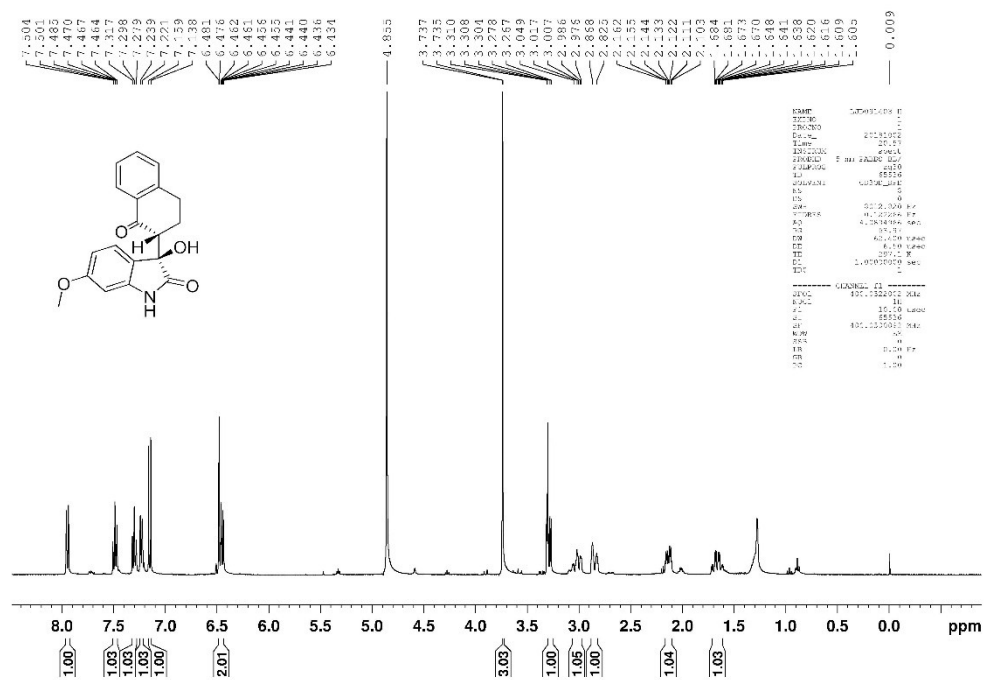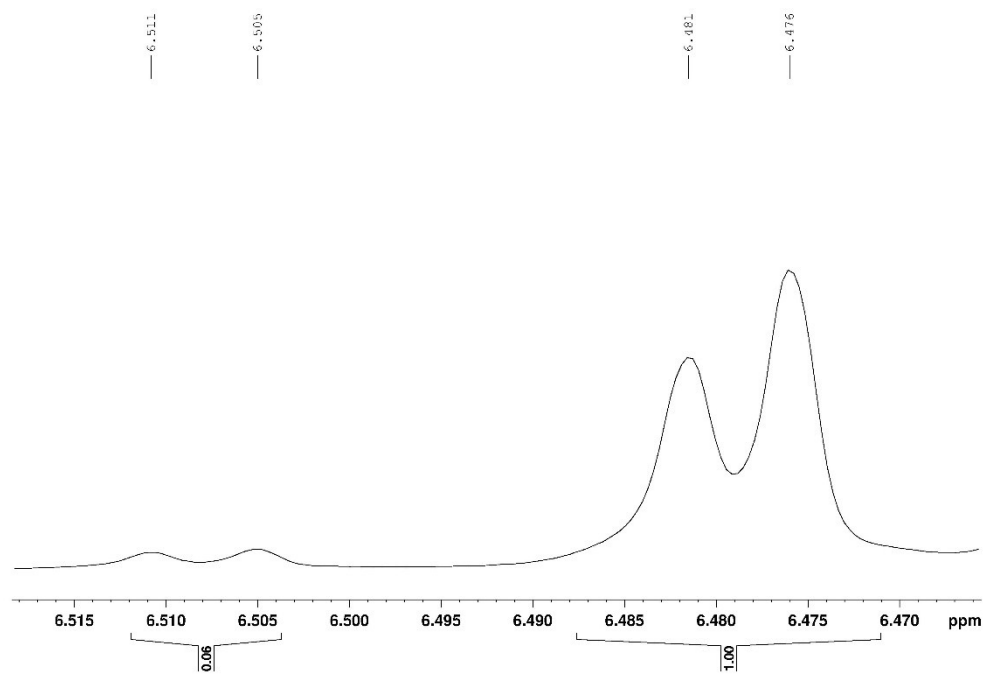

<sup>13</sup>C NMR of **3kb**

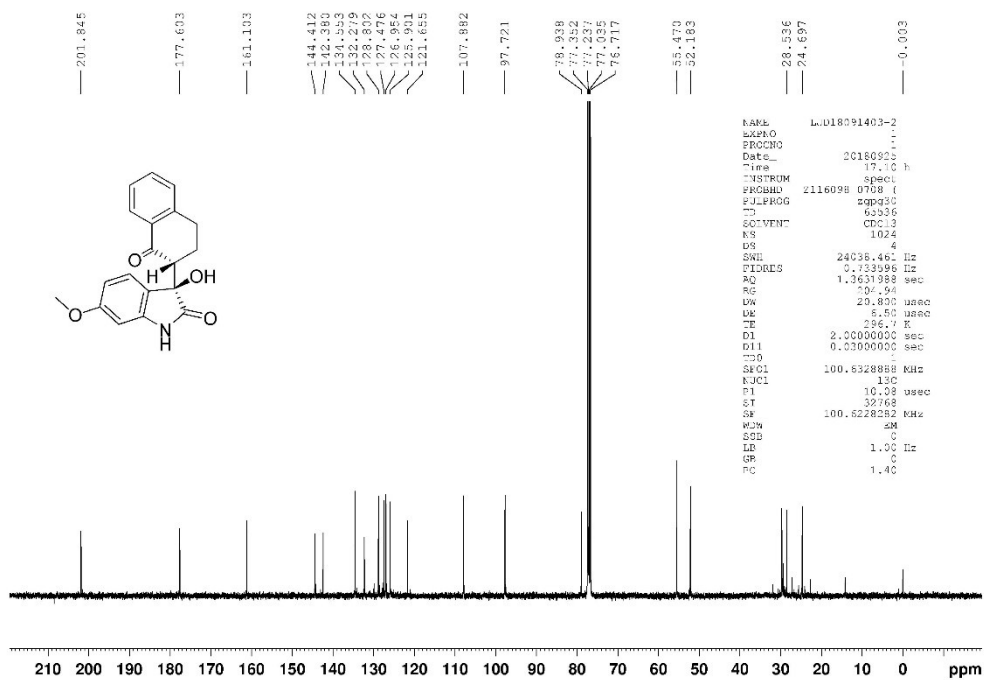

<sup>1</sup>H NMR of **3lb**

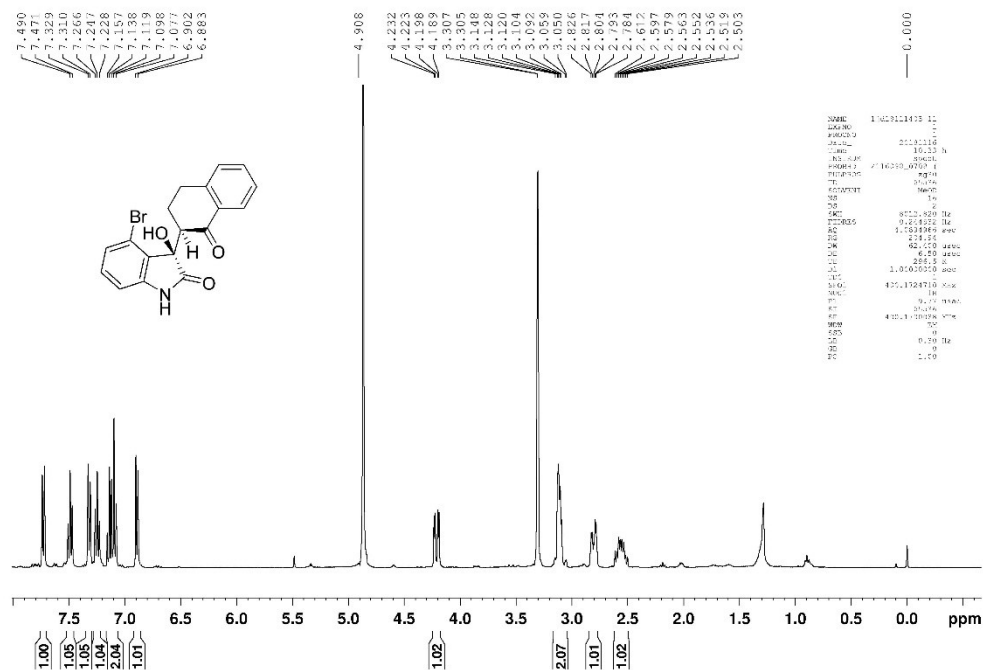

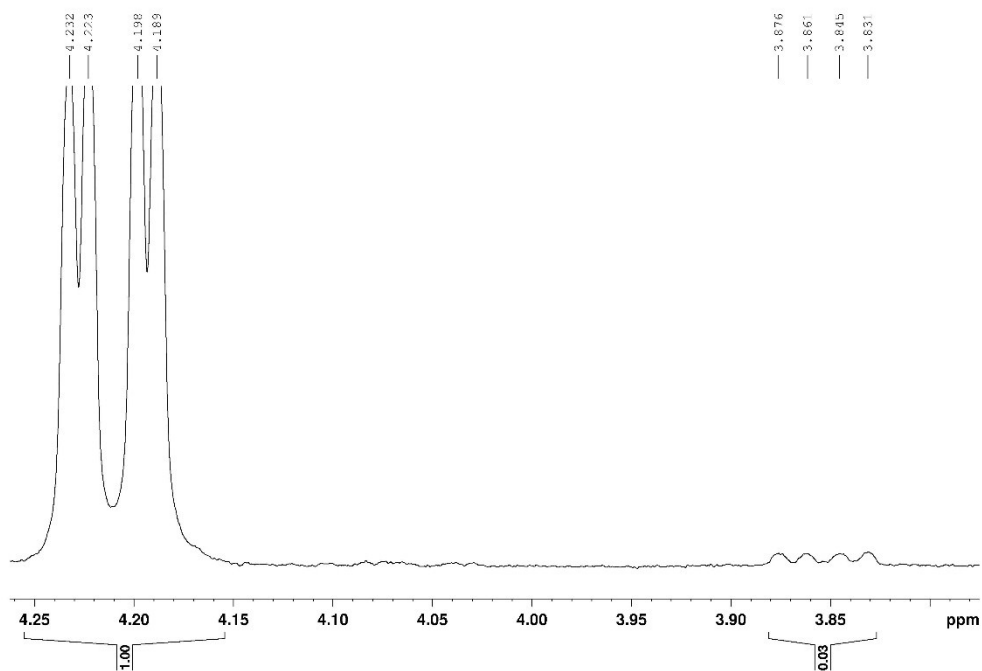

<sup>13</sup>C NMR of **3b**

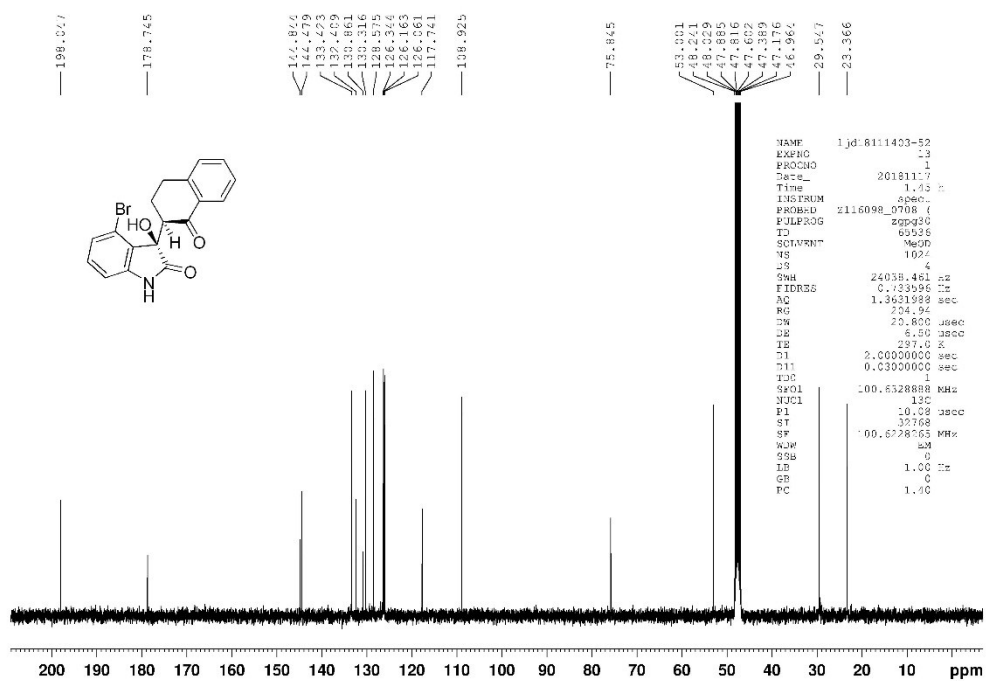



<sup>1</sup>H NMR of **3mb**

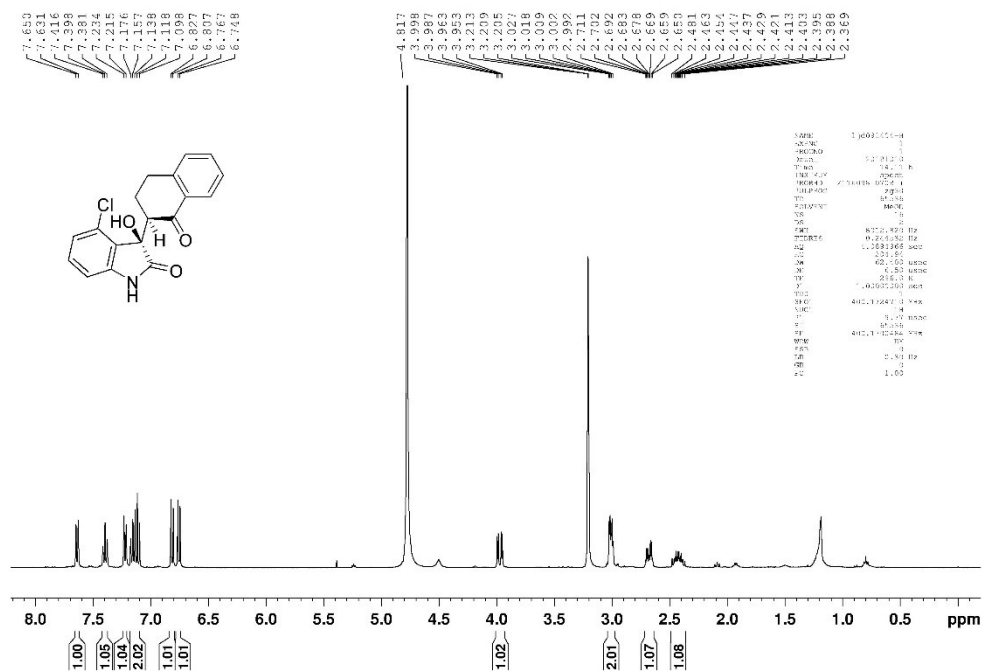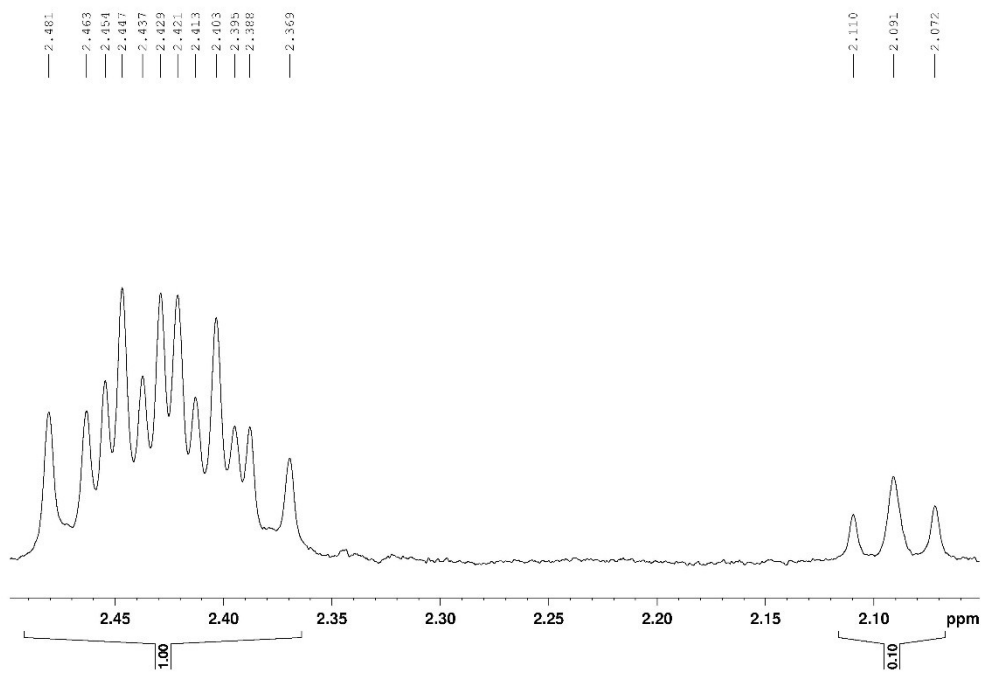

<sup>13</sup>C NMR of **3mb**

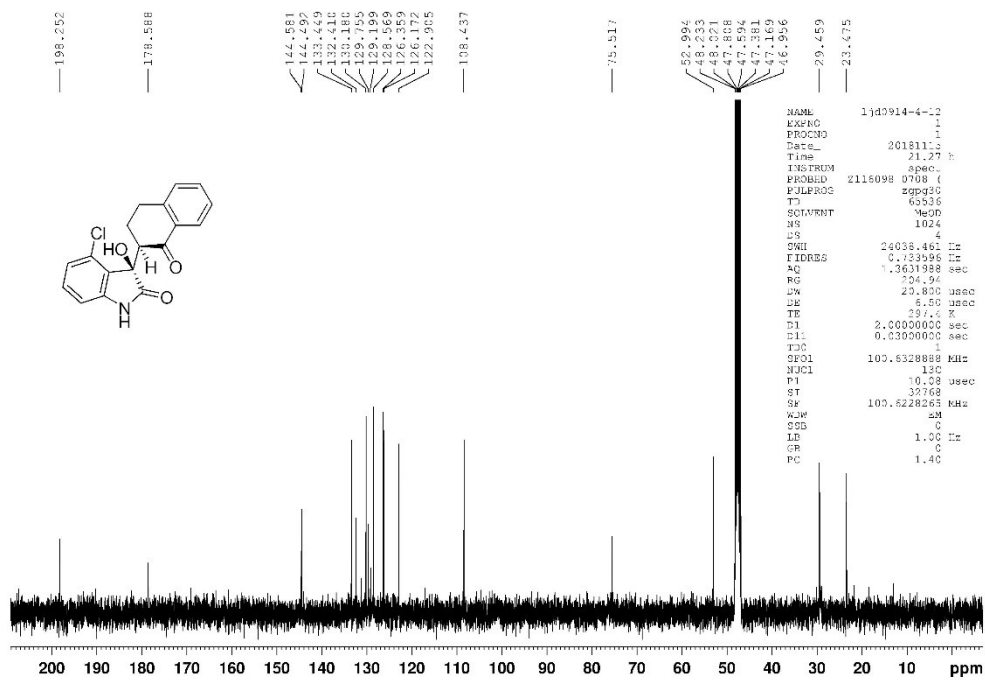

<sup>1</sup>H NMR of **3nb**

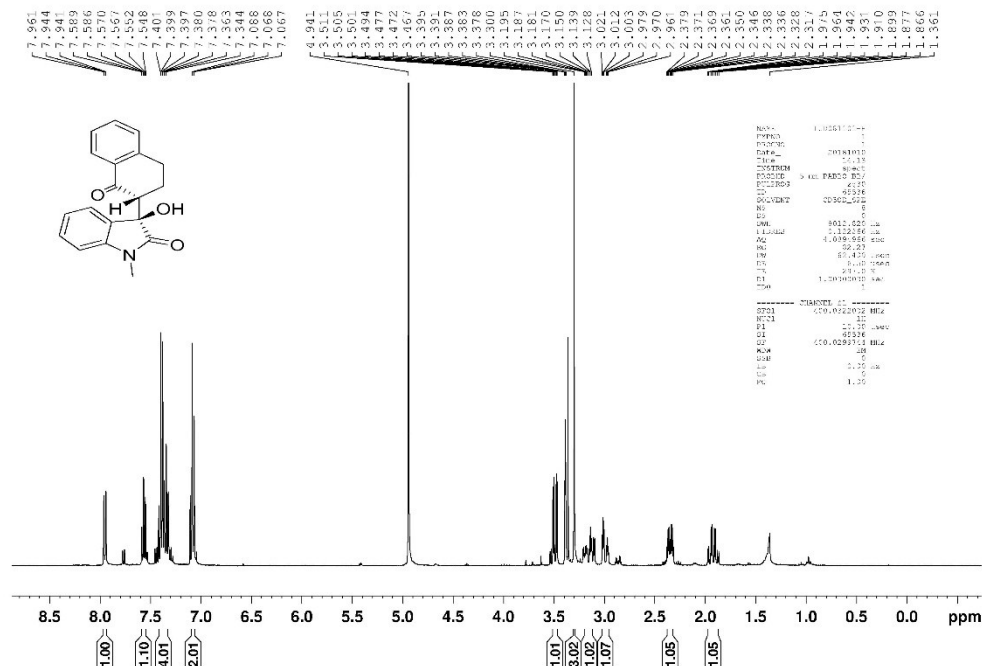

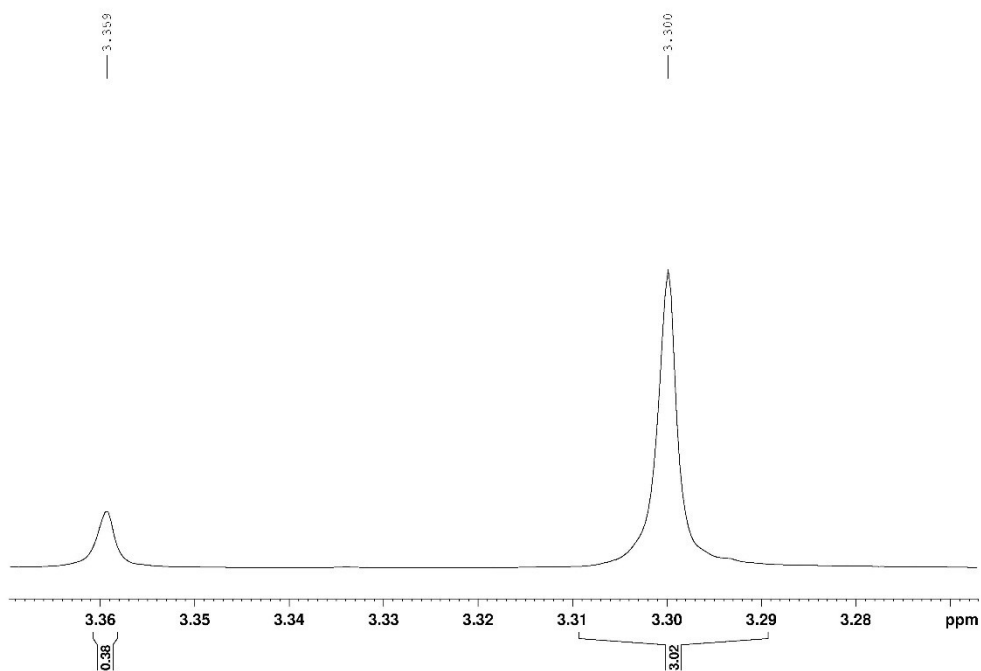

**<sup>13</sup>C NMR of 3nb**

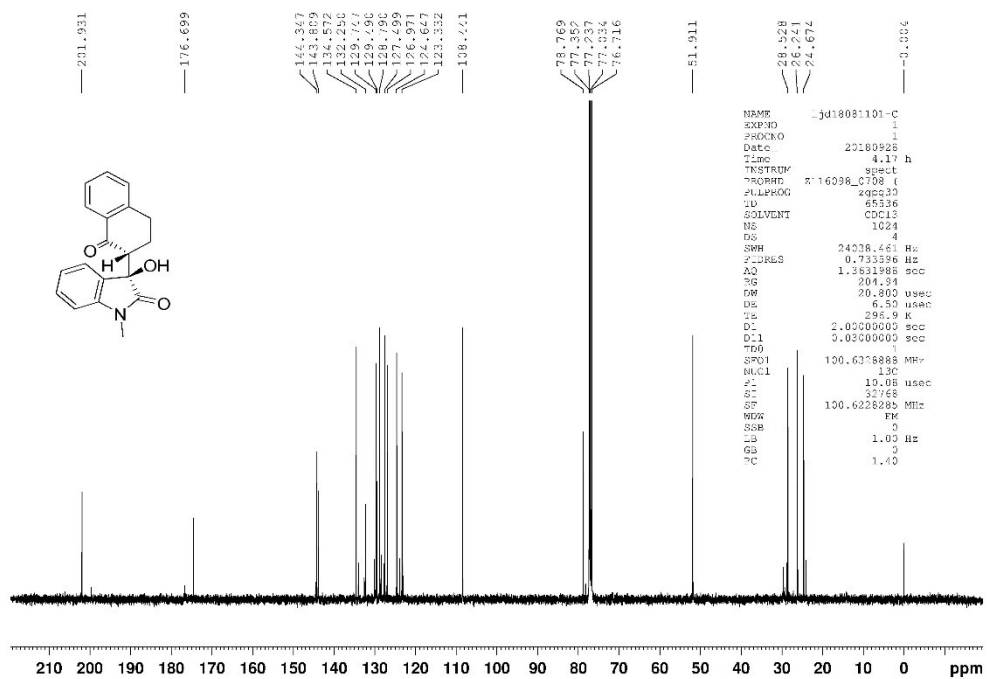

<sup>1</sup>H NMR of **3ob**

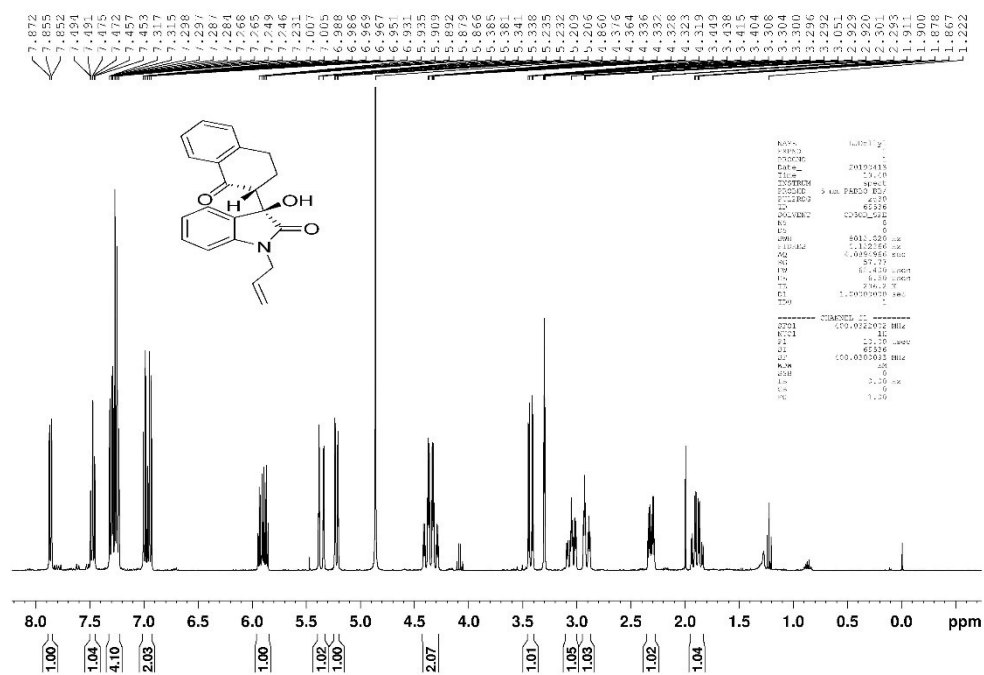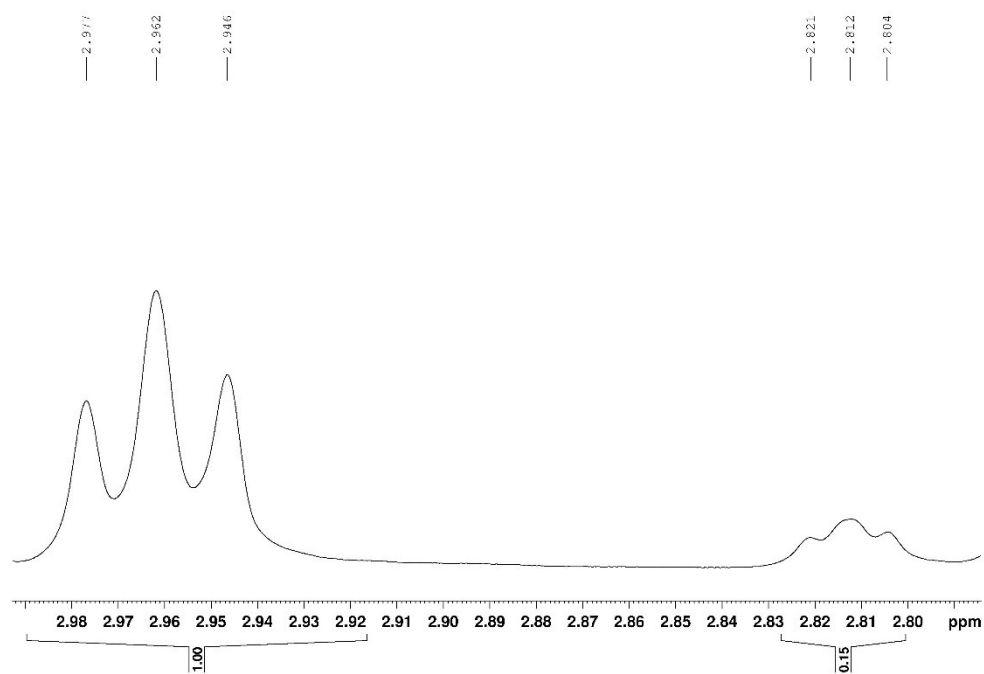

### <sup>13</sup>C NMR of 3ob

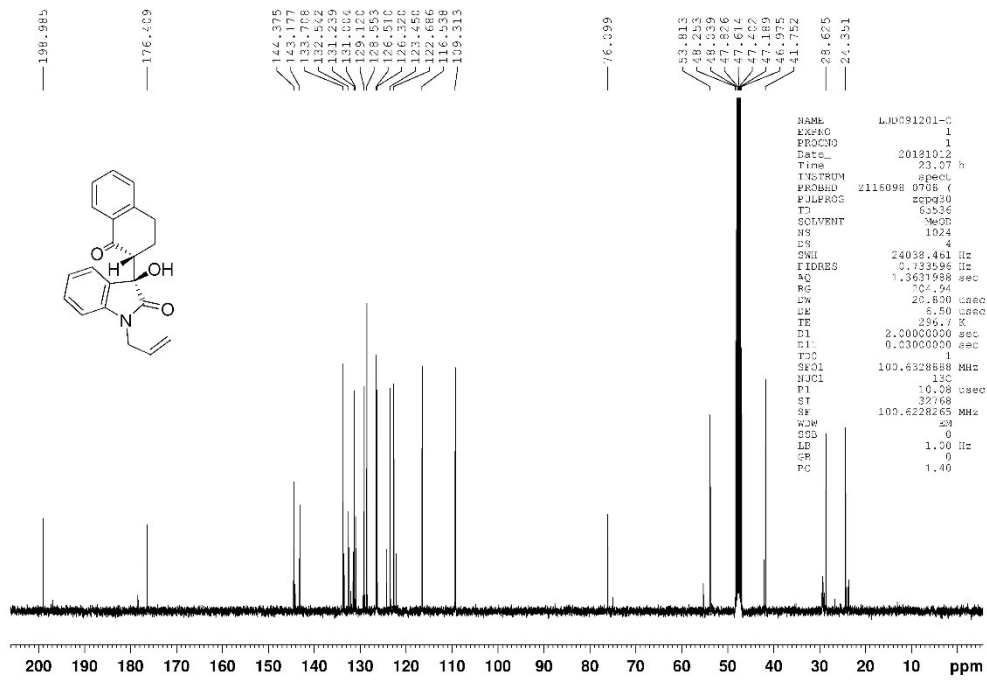

### <sup>1</sup>H NMR of 3pb

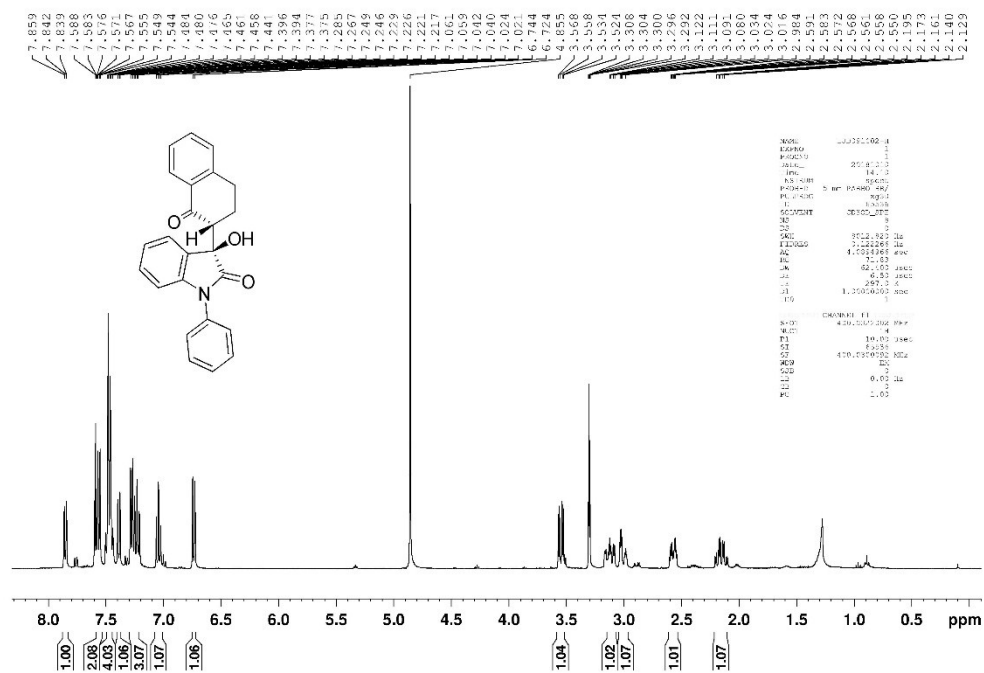

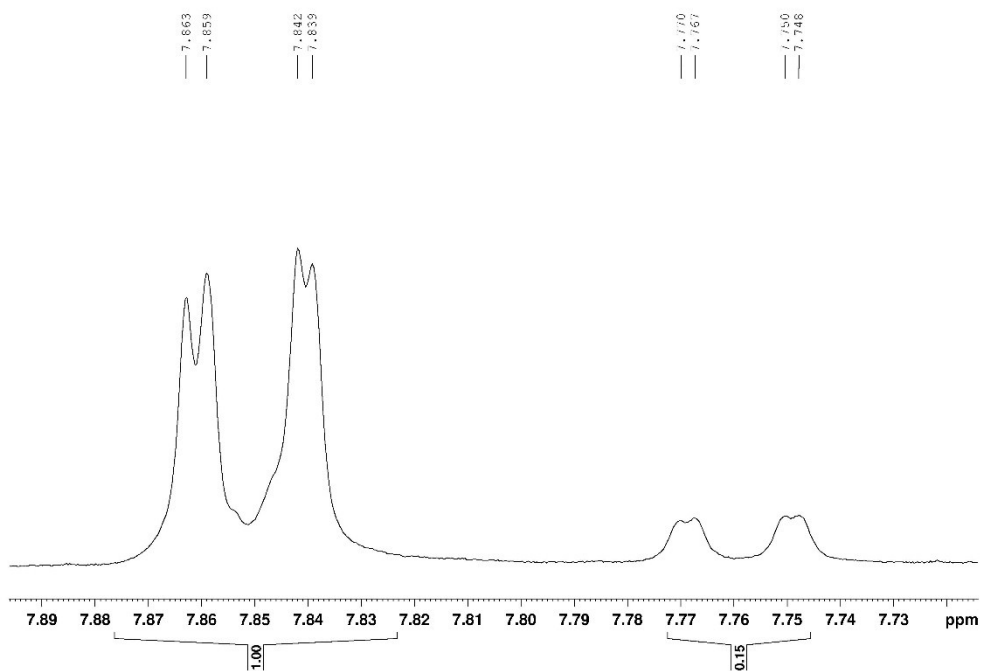

<sup>13</sup>C NMR of 3pb

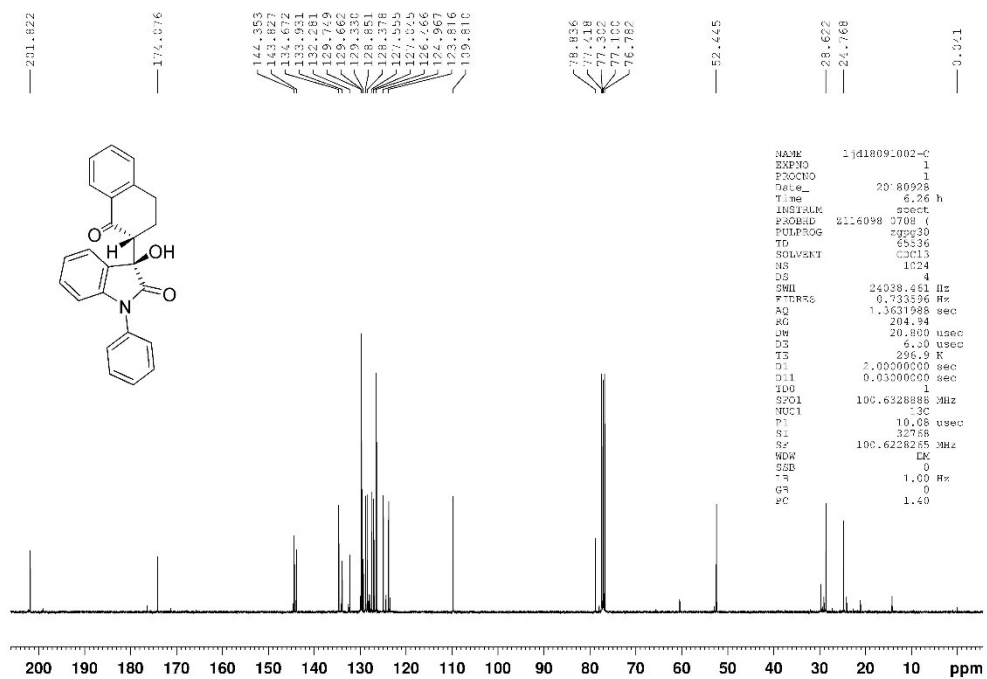

<sup>1</sup>H NMR of **3qc**

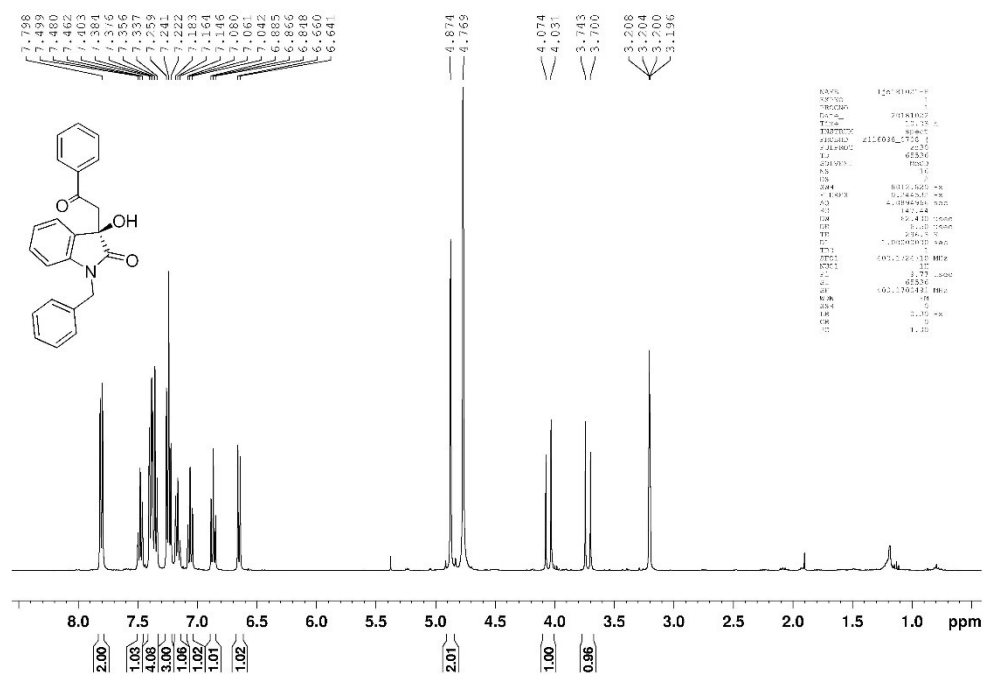

<sup>13</sup>C NMR of **3qc**

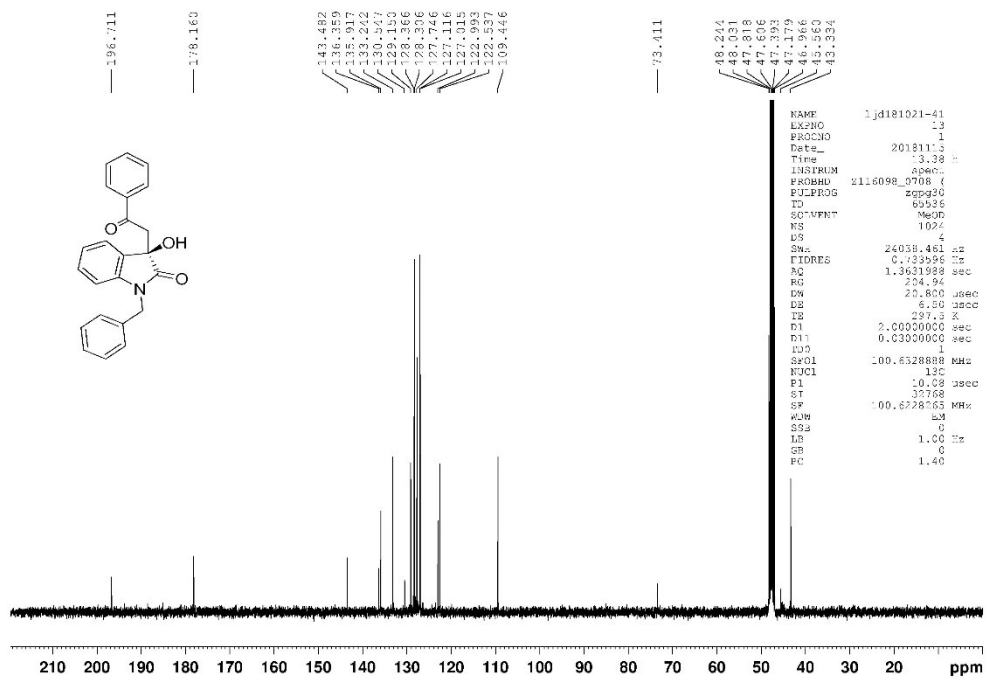

<sup>1</sup>H NMR of **3aa**

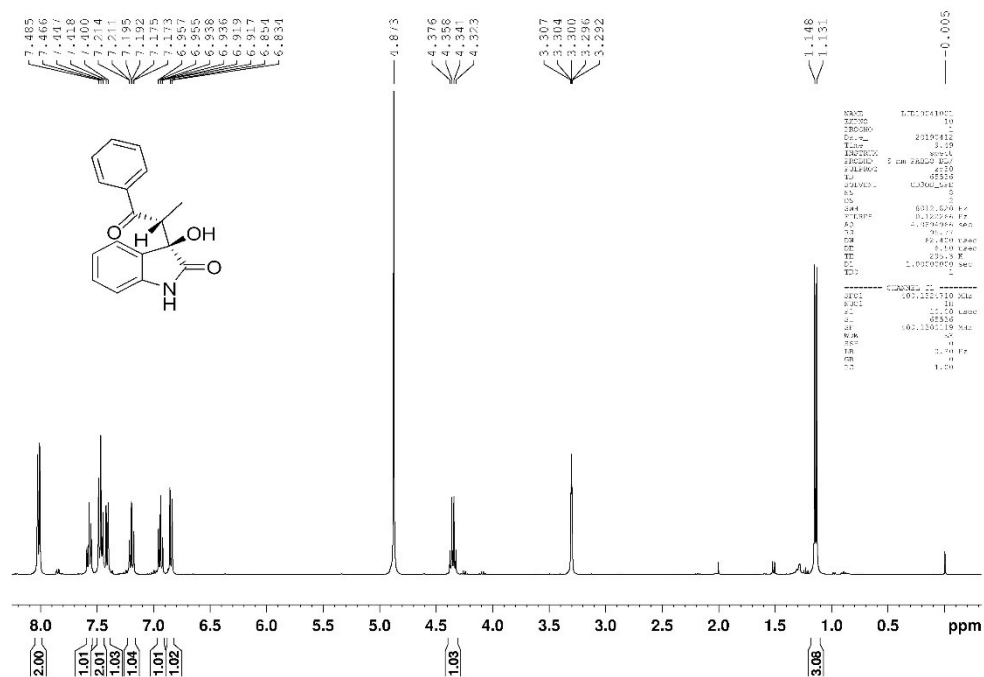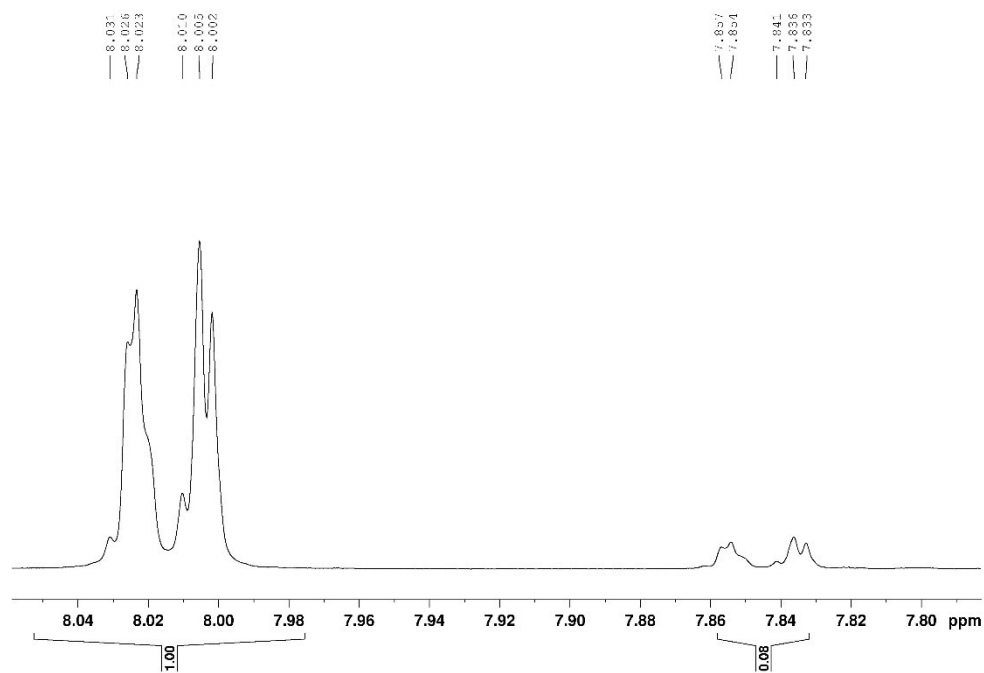



<sup>13</sup>C NMR of **3aa**

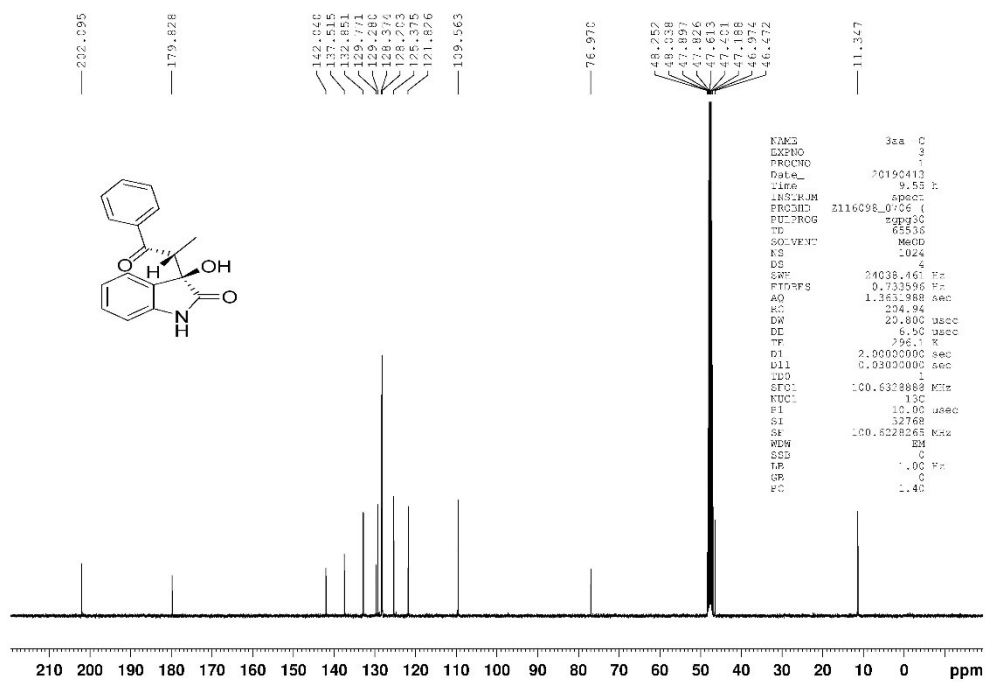

<sup>1</sup>H NMR of **3ad**

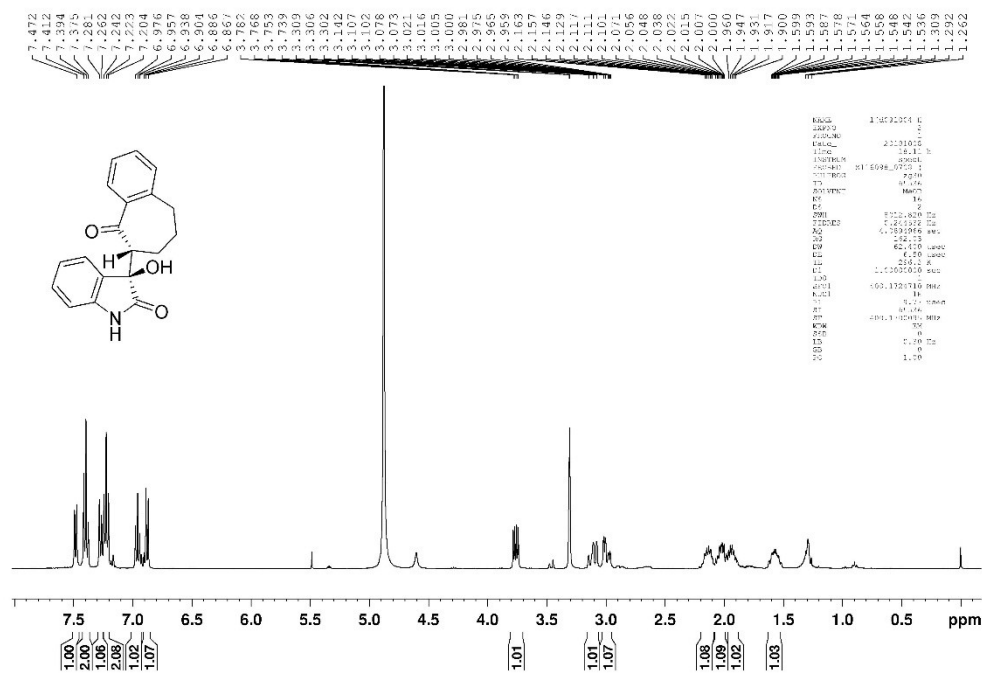

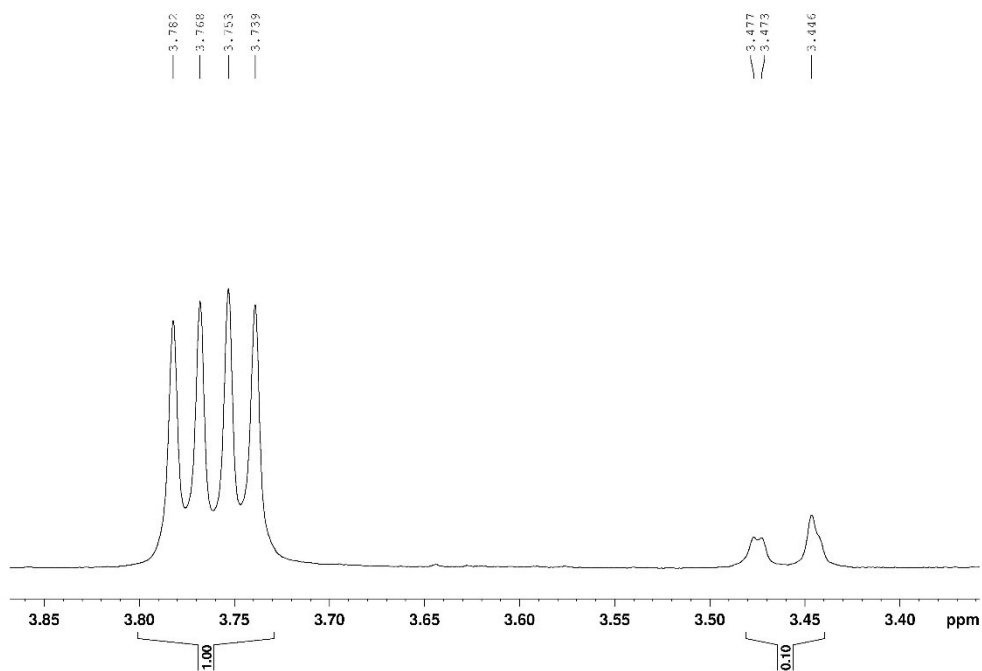

<sup>13</sup>C NMR of 3ad

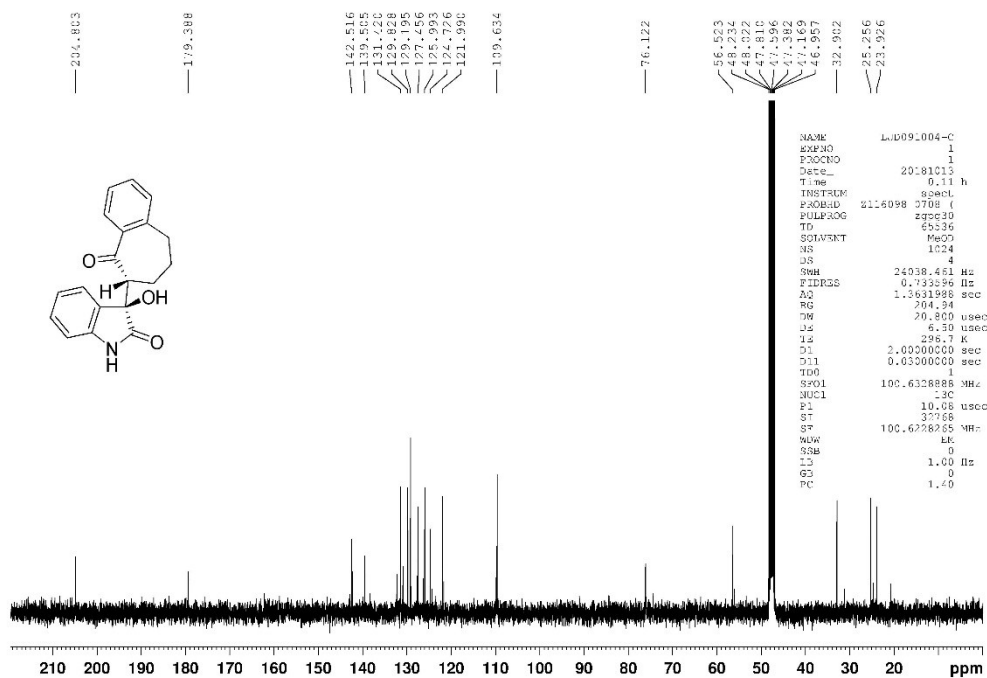

<sup>1</sup>H NMR of **3ac**

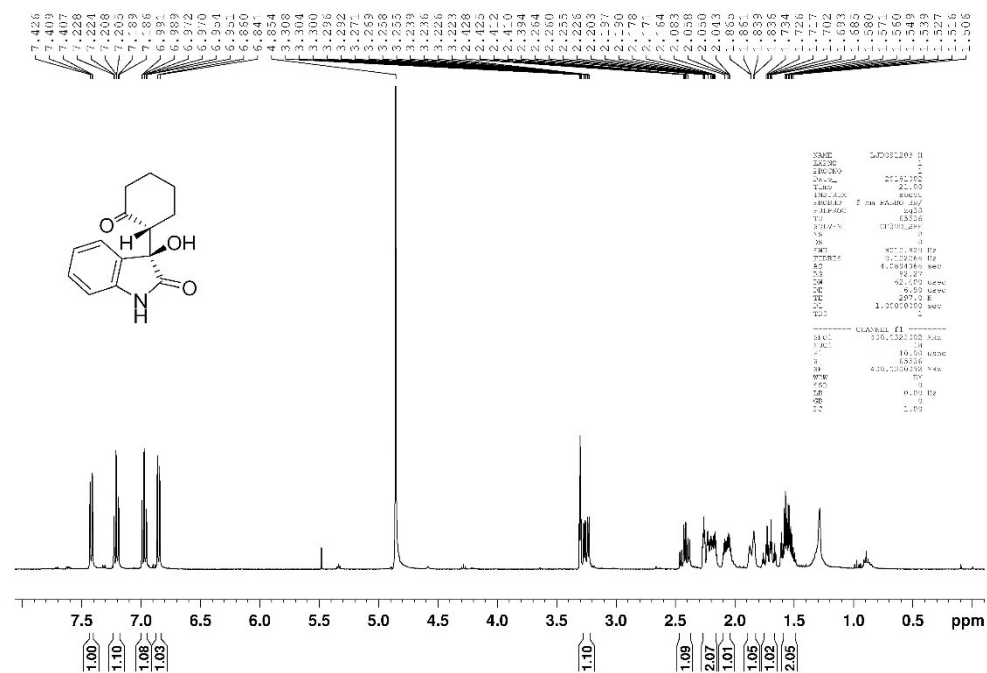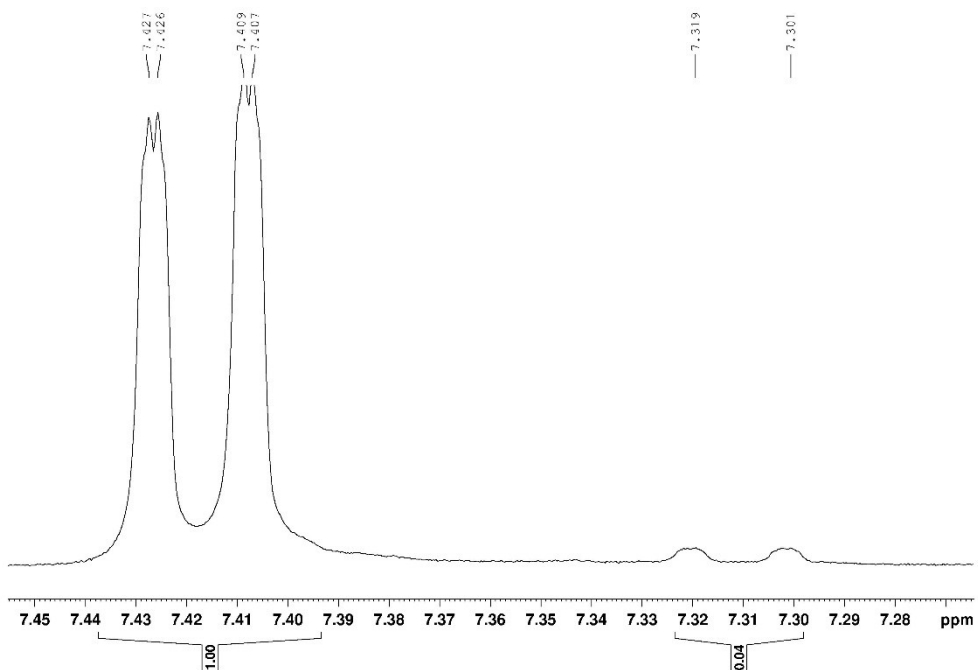

<sup>13</sup>C NMR of **3ae**

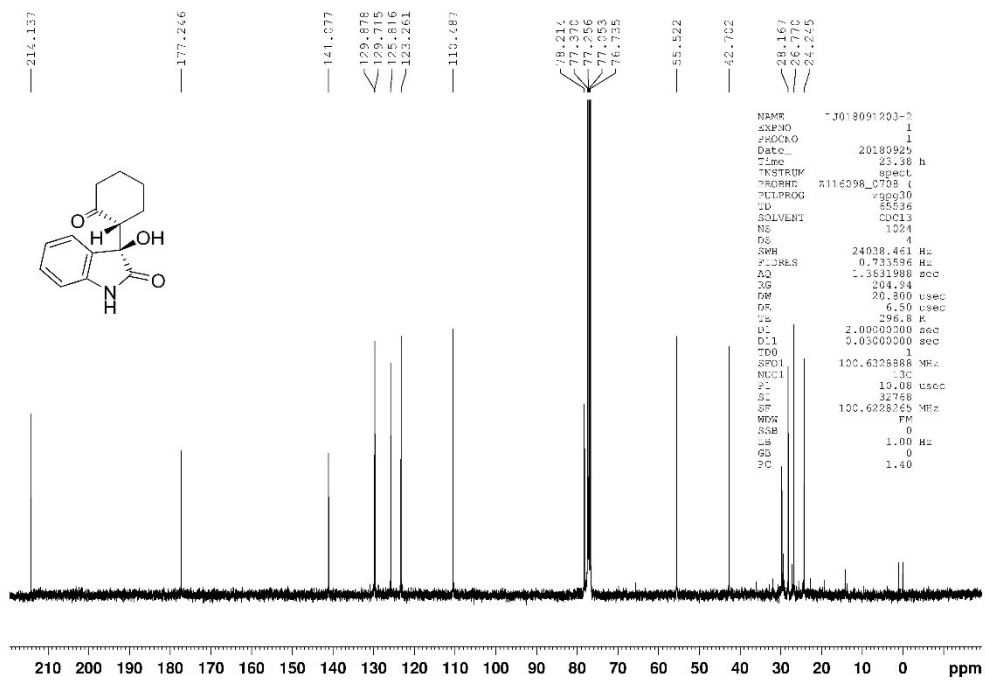

# Part III HPLC data

## 3ab

Racemic sample

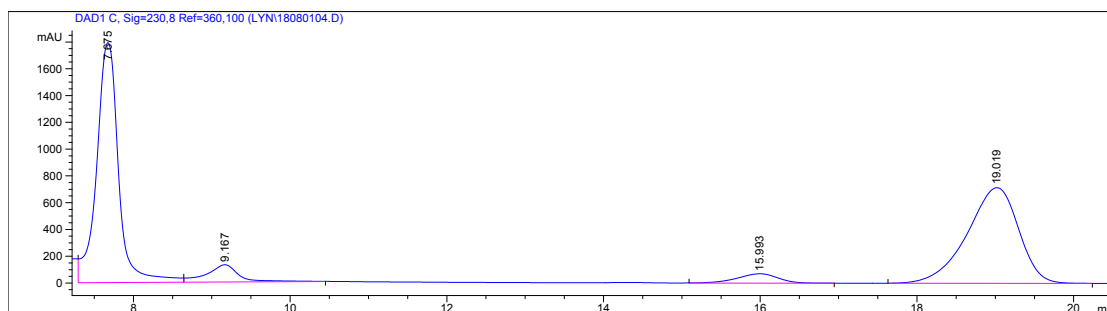

Signal 3: DAD1 C, Sig=230,8 Ref=360,100

| Peak # | RetTime [min] | Type | Width [min] | Area [mAU*s] | Height [mAU] | Area %  |
|--------|---------------|------|-------------|--------------|--------------|---------|
| 1      | 7.675         | VV   | 0.2928      | 3.48359e4    | 1791.70056   | 47.2941 |
| 2      | 9.167         | VB   | 0.4060      | 3715.16602   | 129.01198    | 5.0438  |
| 3      | 15.993        | BB   | 0.5463      | 2506.29175   | 69.57664     | 3.4026  |
| 4      | 19.019        | BB   | 0.6926      | 3.26007e4    | 714.18481    | 44.2595 |

Totals : 7.36581e4 2704.47400

Results obtained with enhanced integrator!

Asymmetric version:

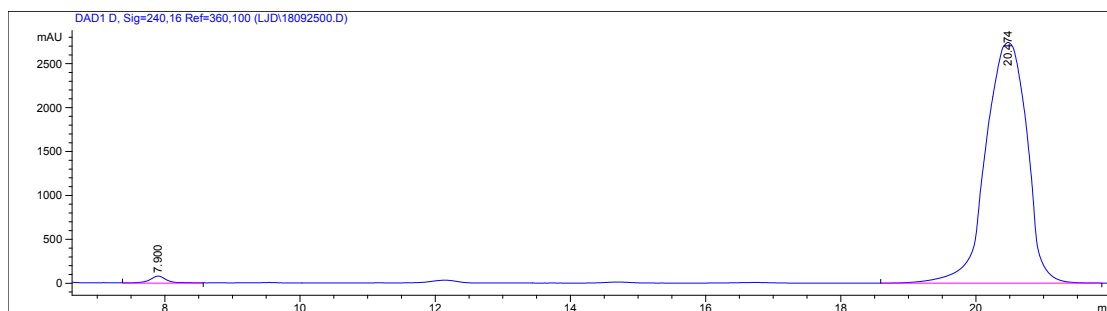

Signal 4: DAD1 D, Sig=240,16 Ref=360,100

| Peak # | RetTime [min] | Type | Width [min] | Area [mAU*s] | Height [mAU] | Area %  |
|--------|---------------|------|-------------|--------------|--------------|---------|
| 1      | 7.900         | VB   | 0.2687      | 1489.54260   | 80.18667     | 1.2784  |
| 2      | 20.474        | VB   | 0.5699      | 1.15028e5    | 2739.52368   | 98.7216 |

Totals : 1.16517e5 2819.71035

Results obtained with enhanced integrator!

### 3bb

Racemic sample

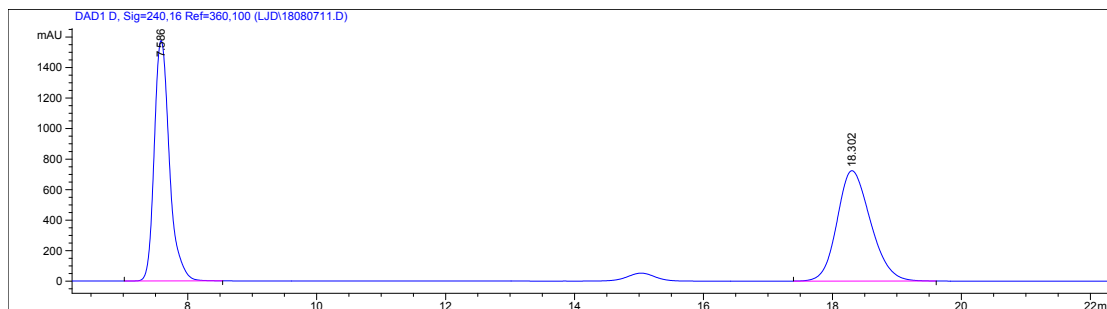

Signal 4: DAD1 D, Sig=240,16 Ref=360,100

| Peak # | RetTime [min] | Type | Width [min] | Area [mAU*s] | Height [mAU] | Area %  |
|--------|---------------|------|-------------|--------------|--------------|---------|
| 1      | 7.586         | PB   | 0.2521      | 2.56735e4    | 1575.40234   | 49.5863 |
| 2      | 18.302        | BB   | 0.5530      | 2.61019e4    | 723.28241    | 50.4137 |

Totals : 5.17754e4 2298.68475

Results obtained with enhanced integrator!

Asymmetric version:

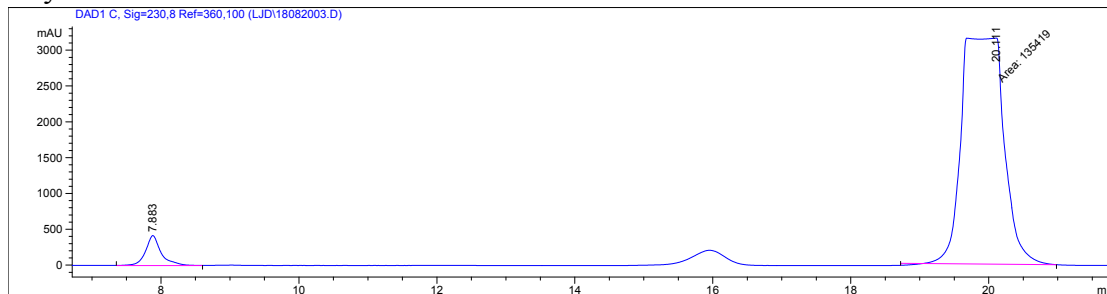

Signal 2: DAD1 C, Sig=230,8 Ref=360,100

| Peak # | RetTime [min] | Type | Width [min] | Area [mAU*s] | Height [mAU] | Area %  |
|--------|---------------|------|-------------|--------------|--------------|---------|
| 1      | 7.883         | VB   | 0.2243      | 6617.15674   | 418.96082    | 4.6588  |
| 2      | 20.111        | MM   | 0.7155      | 1.35419e5    | 3154.58423   | 95.3412 |

Totals : 1.42036e5 3573.54504

Results obtained with enhanced integrator!

### 3cb

Racemic sample

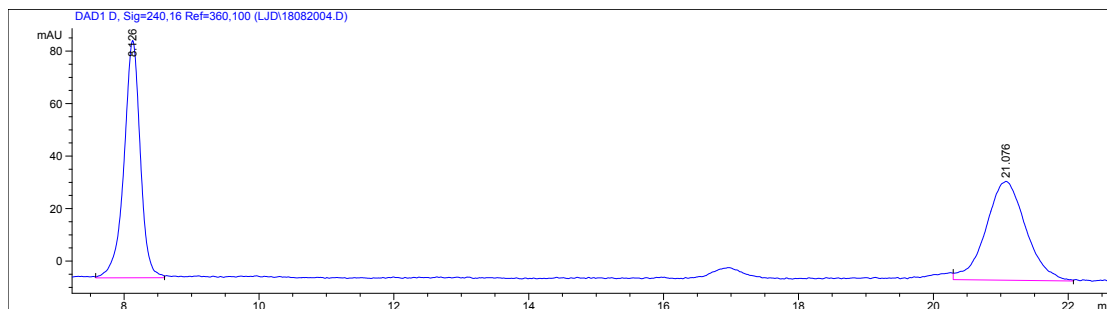

Signal 3: DAD1 D, Sig=240,16 Ref=360,100

| Peak # | RetTime [min] | Type | Width [min] | Area [mAU*s] | Height [mAU] | Area %  |
|--------|---------------|------|-------------|--------------|--------------|---------|
| 1      | 8.126         | VV   | 0.2536      | 1515.42920   | 90.37933     | 49.5591 |
| 2      | 21.076        | VV   | 0.5023      | 1542.39075   | 37.62316     | 50.4409 |

Totals : 3057.81995 128.00249

Results obtained with enhanced integrator!

Asymmetric version:

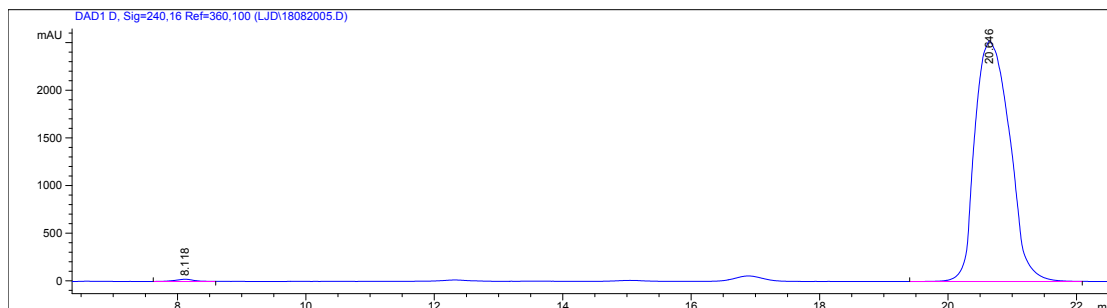

Signal 3: DAD1 D, Sig=240,16 Ref=360,100

| Peak # | RetTime [min] | Type | Width [min] | Area [mAU*s] | Height [mAU] | Area %  |
|--------|---------------|------|-------------|--------------|--------------|---------|
| 1      | 8.118         | BV   | 0.2883      | 478.63980    | 23.23573     | 0.5042  |
| 2      | 20.646        | BB   | 0.4605      | 9.44470e4    | 2524.61646   | 99.4958 |

Totals : 9.49257e4 2547.85219

Results obtained with enhanced integrator!

# 3db

## Racemic sample

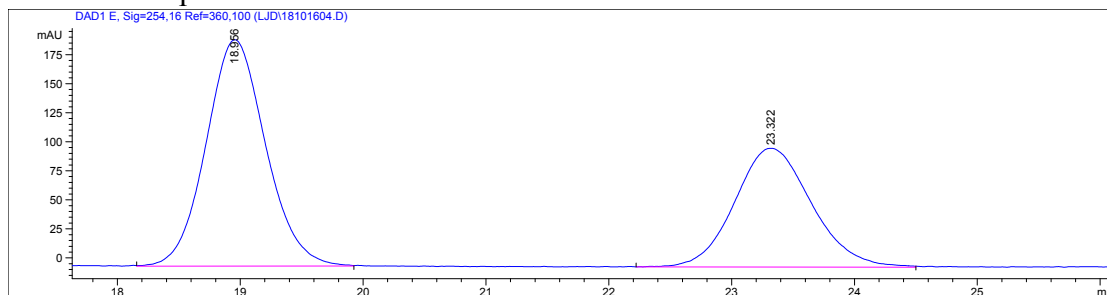

Signal 5: DAD1 E, Sig=254,16 Ref=360,100

| Peak # | RetTime [min] | Type | Width [min] | Area [mAU*s] | Height [mAU] | Area %  |
|--------|---------------|------|-------------|--------------|--------------|---------|
| 1      | 18.956        | VV   | 0.5009      | 6562.18604   | 194.84789    | 59.5425 |
| 2      | 23.322        | VB   | 0.5969      | 4458.82715   | 102.22092    | 40.4575 |

Totals : 1.10210e4 297.06880

Results obtained with enhanced integrator!

## Asymmetric version:

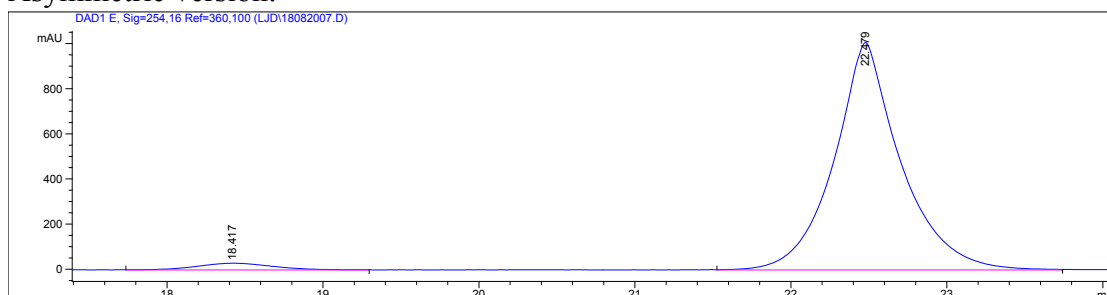

Signal 4: DAD1 E, Sig=254,16 Ref=360,100

| Peak # | RetTime [min] | Type | Width [min] | Area [mAU*s] | Height [mAU] | Area %  |
|--------|---------------|------|-------------|--------------|--------------|---------|
| 1      | 18.417        | VB   | 0.4139      | 1015.76978   | 29.78581     | 3.2822  |
| 2      | 22.479        | VV   | 0.3985      | 2.99325e4    | 1007.86664   | 96.7178 |

Totals : 3.09483e4 1037.65245

Results obtained with enhanced integrator!



### 3eb

Racemic sample

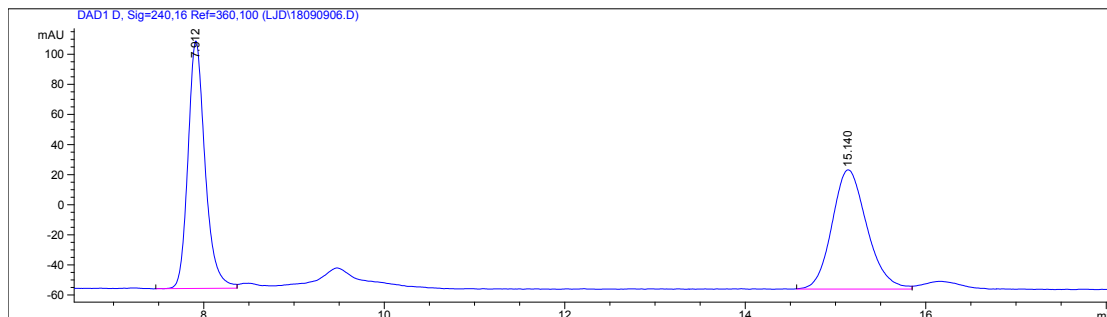

Signal 4: DAD1 D, Sig=240,16 Ref=360,100

| Peak # | RetTime [min] | Type | Width [min] | Area [mAU*s] | Height [mAU] | Area %  |
|--------|---------------|------|-------------|--------------|--------------|---------|
| 1      | 7.912         | PB   | 0.1992      | 2160.67969   | 164.51219    | 50.4221 |
| 2      | 15.140        | BB   | 0.4007      | 2124.50171   | 79.25435     | 49.5779 |

Totals : 4285.18140 243.76654

Results obtained with enhanced integrator!

Asymmetric version:

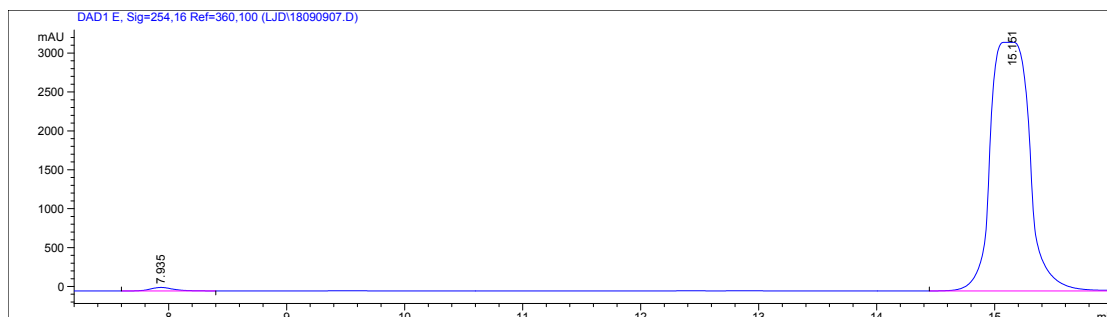

Signal 5: DAD1 E, Sig=254,16 Ref=360,100

| Peak # | RetTime [min] | Type | Width [min] | Area [mAU*s] | Height [mAU] | Area %  |
|--------|---------------|------|-------------|--------------|--------------|---------|
| 1      | 7.935         | VB   | 0.2021      | 598.00000    | 44.70562     | 0.8109  |
| 2      | 15.151        | BB   | 0.3151      | 7.31475e4    | 3195.17407   | 99.1891 |

Totals : 7.37455e4 3239.87969

Results obtained with enhanced integrator!

### 3fb

Racemic sample

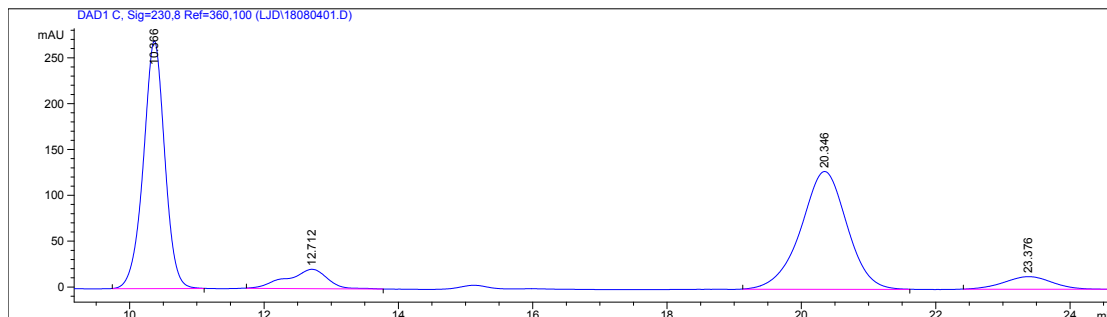

Signal 3: DAD1 C, Sig=230,8 Ref=360,100

| Peak # | RetTime [min] | Type | Width [min] | Area [mAU*s] | Height [mAU] | Area %  |
|--------|---------------|------|-------------|--------------|--------------|---------|
| 1      | 10.366        | BB   | 0.3362      | 5978.97217   | 270.17441    | 43.6015 |
| 2      | 12.712        | BB   | 0.5854      | 894.14624    | 21.22902     | 6.5205  |
| 3      | 20.346        | BB   | 0.7245      | 6152.46631   | 128.52344    | 44.8667 |
| 4      | 23.376        | BB   | 0.6858      | 687.19269    | 13.73321     | 5.0113  |

Totals : 1.37128e4 433.66008

Results obtained with enhanced integrator!

Asymmetric version:

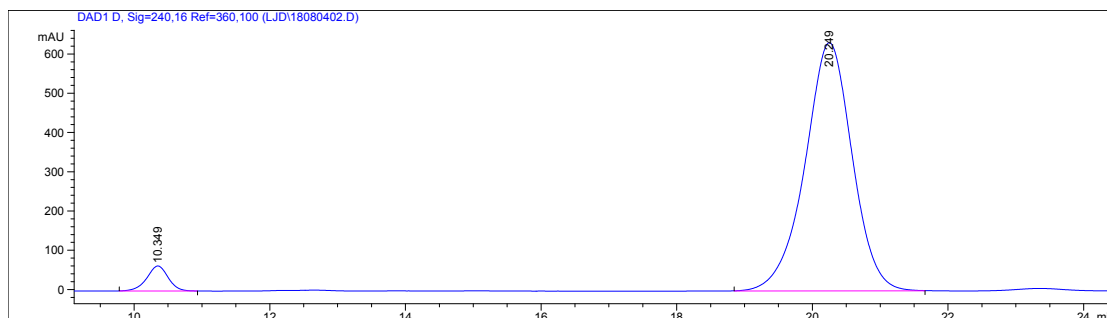

Signal 4: DAD1 D, Sig=240,16 Ref=360,100

| Peak # | RetTime [min] | Type | Width [min] | Area [mAU*s] | Height [mAU] | Area %  |
|--------|---------------|------|-------------|--------------|--------------|---------|
| 1      | 10.349        | BB   | 0.3322      | 1403.83240   | 63.91968     | 4.3877  |
| 2      | 20.249        | BB   | 0.7323      | 3.05909e4    | 632.50098    | 95.6123 |

Totals : 3.19948e4 696.42066

Results obtained with enhanced integrator!

# 3gb

Racemic sample

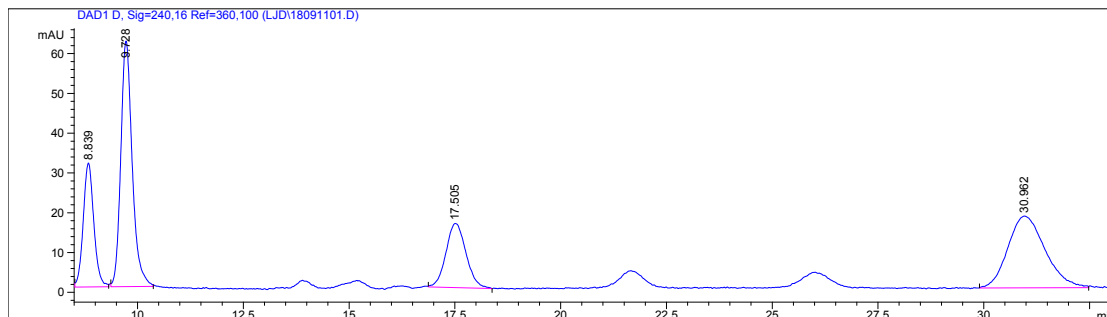

Signal 4: DAD1 D, Sig=240,16 Ref=360,100

| Peak # | RetTime [min] | Type | Width [min] | Area [mAU*s] | Height [mAU] | Area %  |
|--------|---------------|------|-------------|--------------|--------------|---------|
| 1      | 8.839         | VB   | 0.2562      | 539.87201    | 31.14570     | 16.2286 |
| 2      | 9.728         | BB   | 0.2824      | 1155.24670   | 61.72187     | 34.7268 |
| 3      | 17.505        | BP   | 0.4090      | 531.50330    | 16.10513     | 15.9770 |
| 4      | 30.962        | BV   | 0.7442      | 1100.04565   | 18.01979     | 33.0675 |

Totals : 3326.66766 126.99250

Results obtained with enhanced integrator!

Asymmetric version:

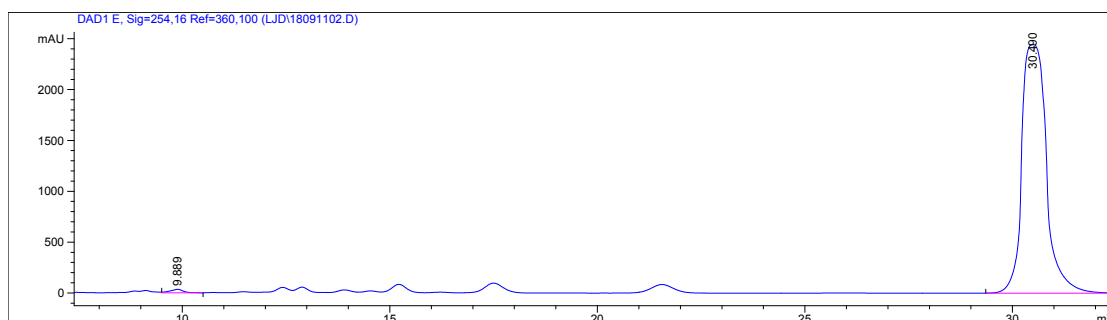

Signal 5: DAD1 E, Sig=254,16 Ref=360,100

| Peak # | RetTime [min] | Type | Width [min] | Area [mAU*s] | Height [mAU] | Area %  |
|--------|---------------|------|-------------|--------------|--------------|---------|
| 1      | 9.889         | VV   | 0.3089      | 759.41522    | 34.48971     | 0.7518  |
| 2      | 30.490        | BBA  | 0.5465      | 1.00258e5    | 2444.53052   | 99.2482 |

Totals : 1.01018e5 2479.02023

Results obtained with enhanced integrator!

# 3hb

Racemic sample

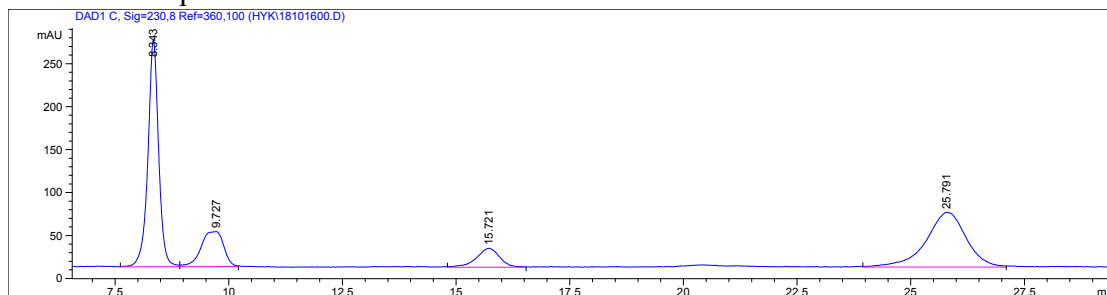

Signal 3: DAD1 C, Sig=230,8 Ref=360,100

| Peak # | RetTime [min] | Type | Width [min] | Area [mAU*s] | Height [mAU] | Area %  |
|--------|---------------|------|-------------|--------------|--------------|---------|
| 1      | 8.343         | BB   | 0.2416      | 4337.87939   | 264.19507    | 41.5157 |
| 2      | 9.727         | BV   | 0.4481      | 1405.78979   | 40.58850     | 13.4541 |
| 3      | 15.721        | VV   | 0.4271      | 783.01459    | 22.00497     | 7.4938  |
| 4      | 25.791        | VV   | 0.7294      | 3922.08276   | 63.78209     | 37.5363 |

Totals : 1.04488e4 390.57063

Results obtained with enhanced integrator!

Asymmetric version:

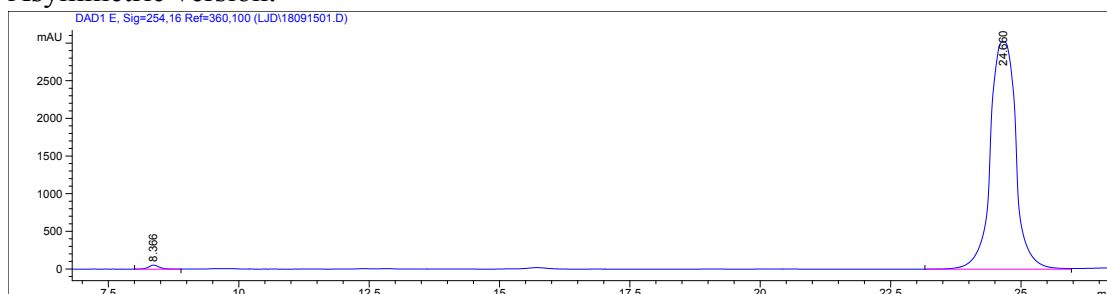

Signal 5: DAD1 E, Sig=254,16 Ref=360,100

| Peak # | RetTime [min] | Type | Width [min] | Area [mAU*s] | Height [mAU] | Area %  |
|--------|---------------|------|-------------|--------------|--------------|---------|
| 1      | 8.366         | VB   | 0.2193      | 783.59772    | 53.36525     | 0.7631  |
| 2      | 24.660        | VV   | 0.5196      | 1.01902e5    | 3020.62793   | 99.2369 |

Totals : 1.02685e5 3073.99318

Results obtained with enhanced integrator!

### 3ib

#### Racemic sample

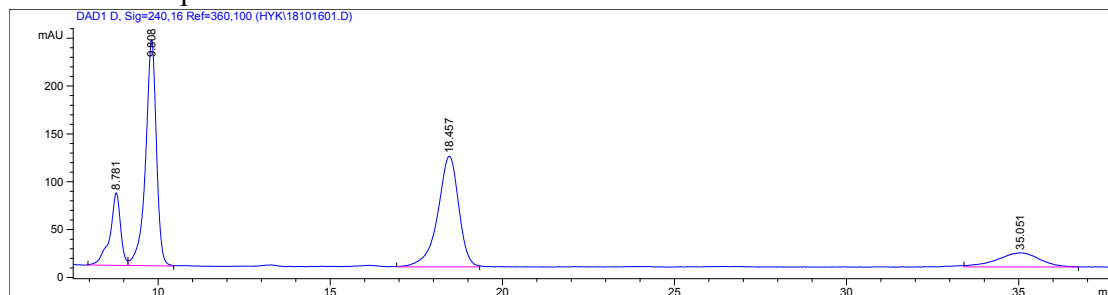

Signal 4: DAD1 D, Sig=240,16 Ref=360,100

| Peak # | RetTime [min] | Type | Width [min] | Area [mAU*s] | Height [mAU] | Area %  |
|--------|---------------|------|-------------|--------------|--------------|---------|
| 1      | 8.781         | BV   | 0.3115      | 1634.90100   | 75.82829     | 12.6273 |
| 2      | 9.808         | VV   | 0.3244      | 5149.72754   | 236.15472    | 39.7744 |
| 3      | 18.457        | BV   | 0.6091      | 4891.39355   | 115.73641    | 37.7791 |
| 4      | 35.051        | BV   | 1.0178      | 1271.31848   | 14.71653     | 9.8191  |

Totals : 1.29473e4 442.43596

Results obtained with enhanced integrator!

#### Asymmetric version:

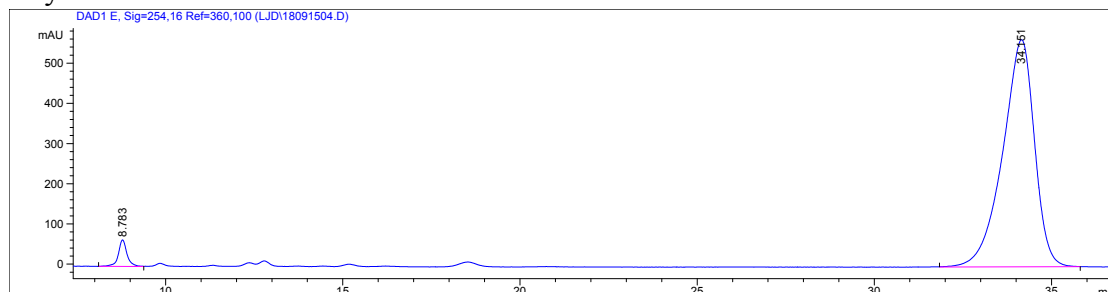

Signal 5: DAD1 E, Sig=254,16 Ref=360,100

| Peak # | RetTime [min] | Type | Width [min] | Area [mAU*s] | Height [mAU] | Area %  |
|--------|---------------|------|-------------|--------------|--------------|---------|
| 1      | 8.783         | PB   | 0.2510      | 1114.87671   | 66.02354     | 3.0642  |
| 2      | 34.151        | BB   | 0.9143      | 3.52687e4    | 564.98499    | 96.9358 |

Totals : 3.63836e4 631.00852

Results obtained with enhanced integrator!

# 3jb

Racemic sample

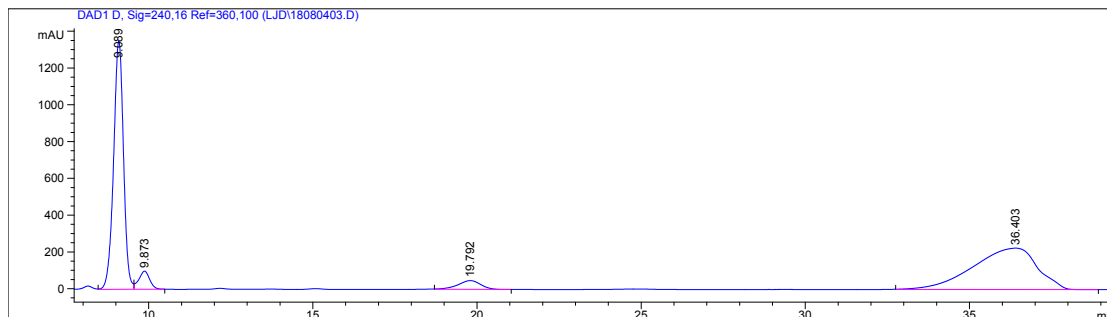

Signal 4: DAD1 D, Sig=240,16 Ref=360,100

| Peak # | RetTime [min] | Type | Width [min] | Area [mAU*s] | Height [mAU] | Area %  |
|--------|---------------|------|-------------|--------------|--------------|---------|
| 1      | 9.089         | VV   | 0.3203      | 2.82749e4    | 1350.28369   | 44.7169 |
| 2      | 9.873         | VB   | 0.3444      | 2275.38135   | 98.91264     | 3.5985  |
| 3      | 19.792        | BP   | 0.7252      | 2260.37939   | 47.33094     | 3.5748  |
| 4      | 36.403        | BPA  | 1.7748      | 3.04204e4    | 225.08093    | 48.1098 |

Totals : 6.32311e4 1721.60820

Results obtained with enhanced integrator!

Asymmetric version:

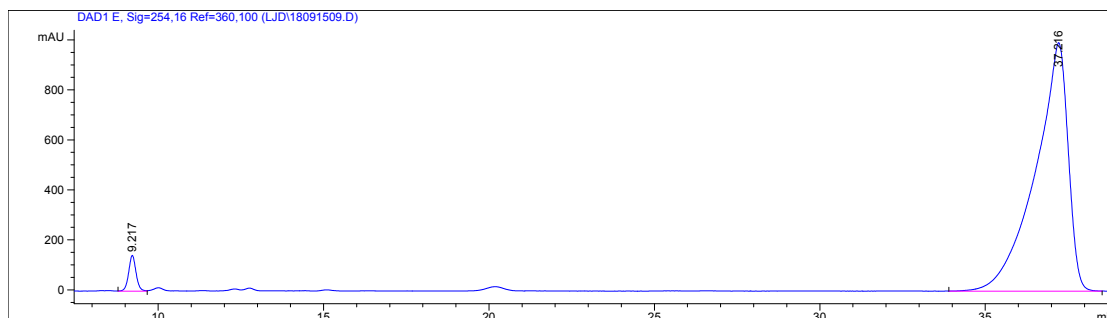

Signal 5: DAD1 E, Sig=254,16 Ref=360,100

| Peak # | RetTime [min] | Type | Width [min] | Area [mAU*s] | Height [mAU] | Area %  |
|--------|---------------|------|-------------|--------------|--------------|---------|
| 1      | 9.217         | VV   | 0.2357      | 2228.91016   | 143.10284    | 3.1581  |
| 2      | 37.216        | VV   | 0.8260      | 6.83491e4    | 994.30804    | 96.8419 |

Totals : 7.05780e4 1137.41089

Results obtained with enhanced integrator!

# 3kb

## Racemic sample

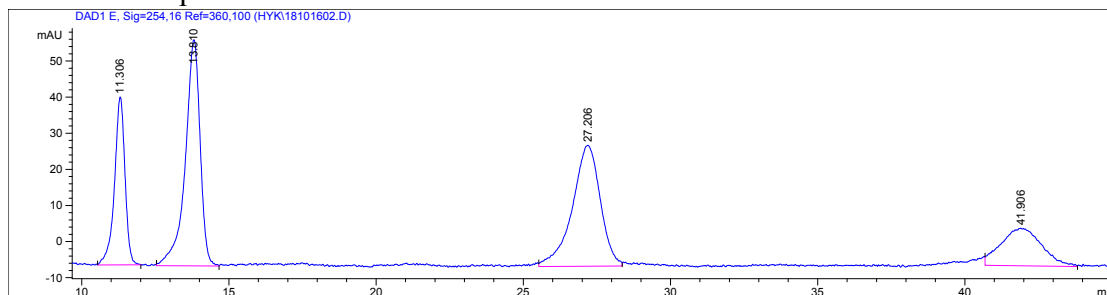

Signal 5: DAD1 E, Sig=254,16 Ref=360,100

| Peak # | RetTime [min] | Type | Width [min] | Area [mAU*s] | Height [mAU] | Area %  |
|--------|---------------|------|-------------|--------------|--------------|---------|
| 1      | 11.306        | VB   | 0.3494      | 1152.89844   | 46.47765     | 17.5740 |
| 2      | 13.810        | BV   | 0.4936      | 2198.26538   | 62.61521     | 33.5088 |
| 3      | 27.206        | VV   | 0.7797      | 2207.90894   | 33.46795     | 33.6558 |
| 4      | 41.906        | VV   | 1.1312      | 1001.18280   | 10.41811     | 15.2613 |

Totals : 6560.25555 152.97892

Results obtained with enhanced integrator!

## Asymmetric version:

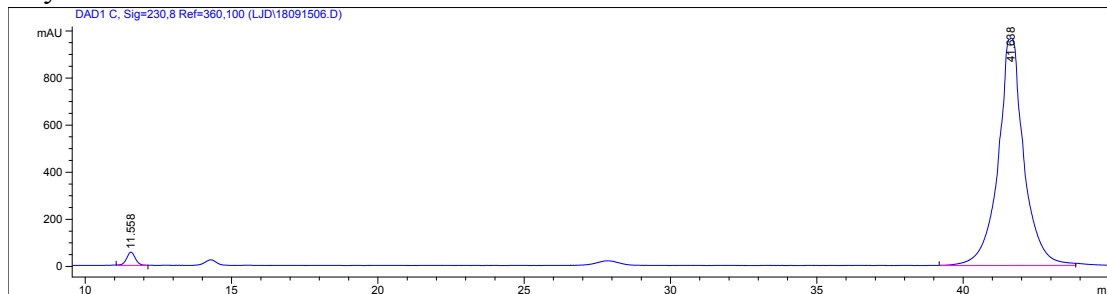

Signal 3: DAD1 C, Sig=230,8 Ref=360,100

| Peak # | RetTime [min] | Type | Width [min] | Area [mAU*s] | Height [mAU] | Area %  |
|--------|---------------|------|-------------|--------------|--------------|---------|
| 1      | 11.558        | VV   | 0.3173      | 1197.17786   | 56.48870     | 2.0047  |
| 2      | 41.638        | VB   | 0.7453      | 5.85206e4    | 965.28320    | 97.9953 |

Totals : 5.97178e4 1021.77190

Results obtained with enhanced integrator!

### 31b

Racemic sample

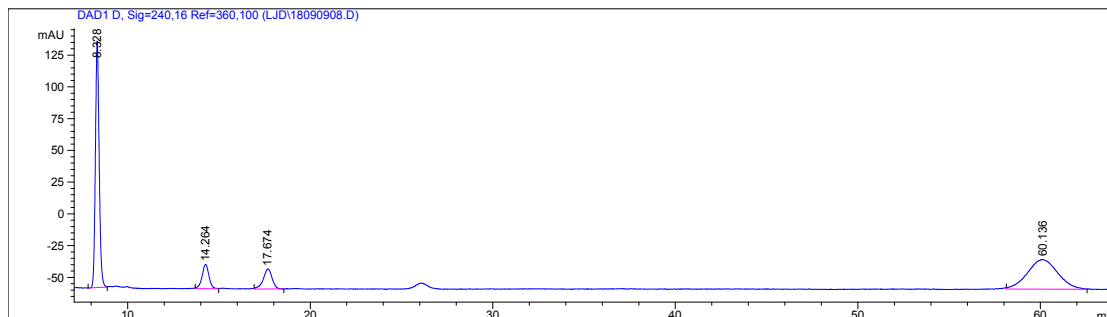

Signal 4: DAD1 D, Sig=240,16 Ref=360,100

| Peak # | RetTime [min] | Type | Width [min] | Area [mAU*s] | Height [mAU] | Area %  |
|--------|---------------|------|-------------|--------------|--------------|---------|
| 1      | 8.328         | PB   | 0.2195      | 2786.68066   | 194.05388    | 42.9380 |
| 2      | 14.264        | BP   | 0.3662      | 496.84735    | 19.05232     | 7.6556  |
| 3      | 17.674        | BB   | 0.4286      | 526.24005    | 15.71640     | 8.1085  |
| 4      | 60.136        | BV   | 1.3439      | 2680.24023   | 23.37192     | 41.2979 |

Totals : 6490.00830 252.19452

Results obtained with enhanced integrator!

Asymmetric version:

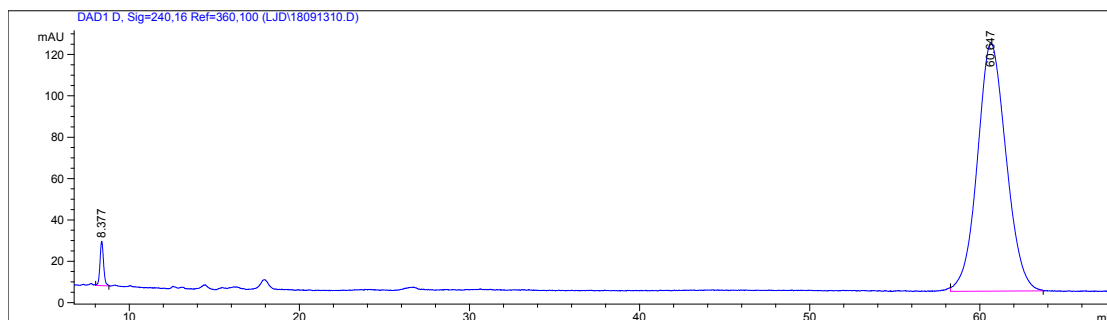

Signal 4: DAD1 D, Sig=240,16 Ref=360,100

| Peak # | RetTime [min] | Type | Width [min] | Area [mAU*s] | Height [mAU] | Area %  |
|--------|---------------|------|-------------|--------------|--------------|---------|
| 1      | 8.377         | VB   | 0.2183      | 313.68506    | 21.48586     | 2.1856  |
| 2      | 60.647        | BB   | 1.3807      | 1.40384e4    | 120.01304    | 97.8144 |

Totals : 1.43521e4 141.49889

Results obtained with enhanced integrator!



# 3mb

Racemic sample

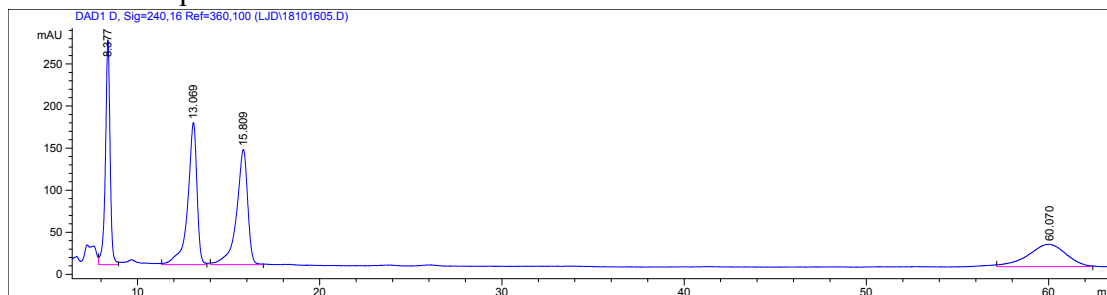

Signal 4: DAD1 D, Sig=240,16 Ref=360,100

| Peak # | RetTime [min] | Type | Width [min] | Area [mAU*s] | Height [mAU] | Area %  |
|--------|---------------|------|-------------|--------------|--------------|---------|
| 1      | 8.377         | VB   | 0.2629      | 4740.11084   | 267.34802    | 23.3246 |
| 2      | 13.069        | VV   | 0.5083      | 5941.88184   | 168.96892    | 29.2381 |
| 3      | 15.809        | BB   | 0.6001      | 5792.06738   | 136.76631    | 28.5009 |
| 4      | 60.070        | BV   | 1.7082      | 3848.33862   | 26.46956     | 18.9364 |

Totals : 2.03224e4 599.55281

Results obtained with enhanced integrator!

Asymmetric version:

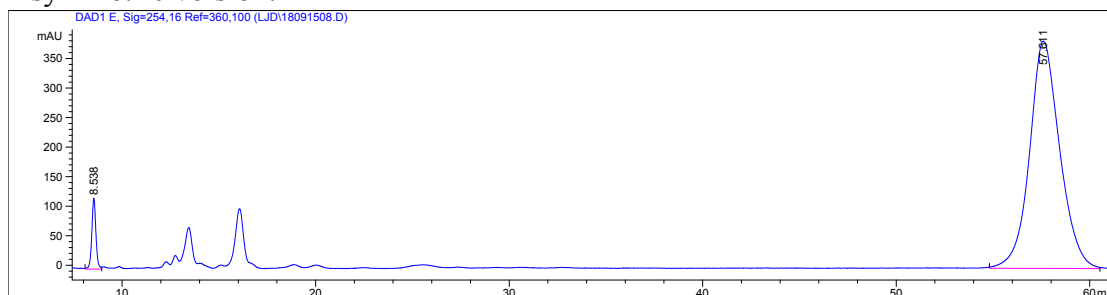

Signal 5: DAD1 E, Sig=254,16 Ref=360,100

| Peak # | RetTime [min] | Type | Width [min] | Area [mAU*s] | Height [mAU] | Area %  |
|--------|---------------|------|-------------|--------------|--------------|---------|
| 1      | 8.538         | BB   | 0.2262      | 1771.12000   | 119.96414    | 4.0841  |
| 2      | 57.611        | VV   | 1.2779      | 4.15956e4    | 384.57690    | 95.9159 |

Totals : 4.33667e4 504.54105

Results obtained with enhanced integrator!

# 3nb

## Racemic sample

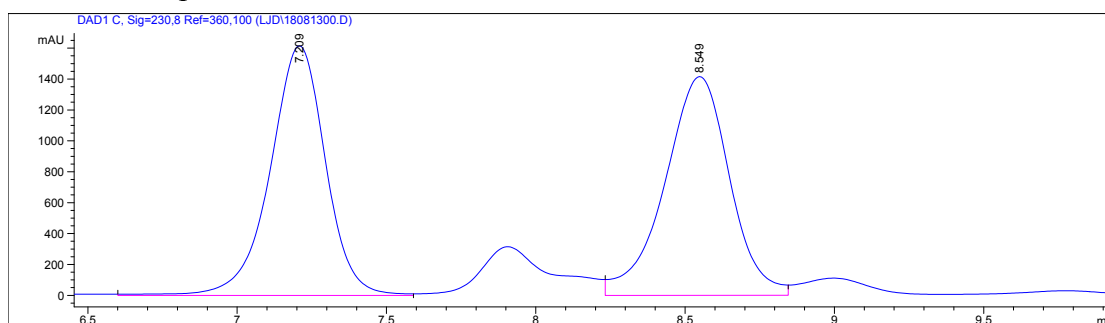

Signal 3: DAD1 C, Sig=230,8 Ref=360,100

| Peak # | RetTime [min] | Type | Width [min] | Area [mAU*s] | Height [mAU] | Area %  |
|--------|---------------|------|-------------|--------------|--------------|---------|
| 1      | 7.209         | VV   | 0.1964      | 2.08335e4    | 1615.74463   | 49.3770 |
| 2      | 8.549         | VV   | 0.2300      | 2.13592e4    | 1415.79272   | 50.6230 |

Totals : 4.21927e4 3031.53735

Results obtained with enhanced integrator!

## Asymmetric version:

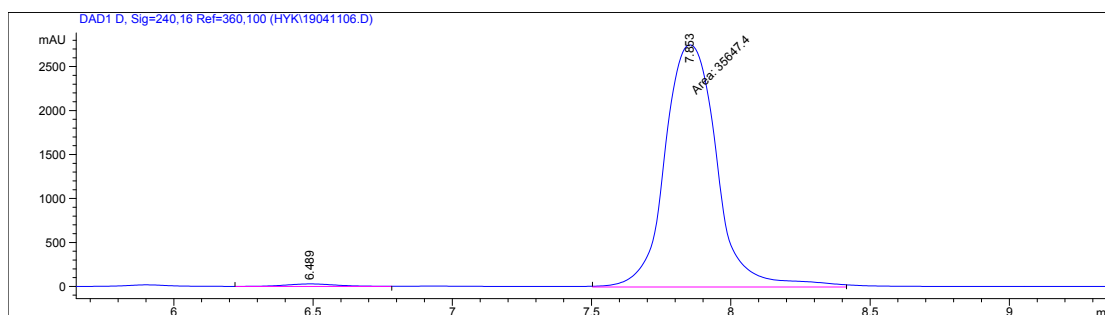

Signal 4: DAD1 D, Sig=240,16 Ref=360,100

| Peak # | RetTime [min] | Type | Width [min] | Area [mAU*s] | Height [mAU] | Area %  |
|--------|---------------|------|-------------|--------------|--------------|---------|
| 1      | 6.489         | VV   | 0.2047      | 394.82864    | 29.39762     | 1.0955  |
| 2      | 7.853         | MM   | 0.2157      | 3.56474e4    | 2754.58887   | 98.9045 |

Totals : 3.60423e4 2783.98649

Results obtained with enhanced integrator!

## 3ob

## Racemic sample

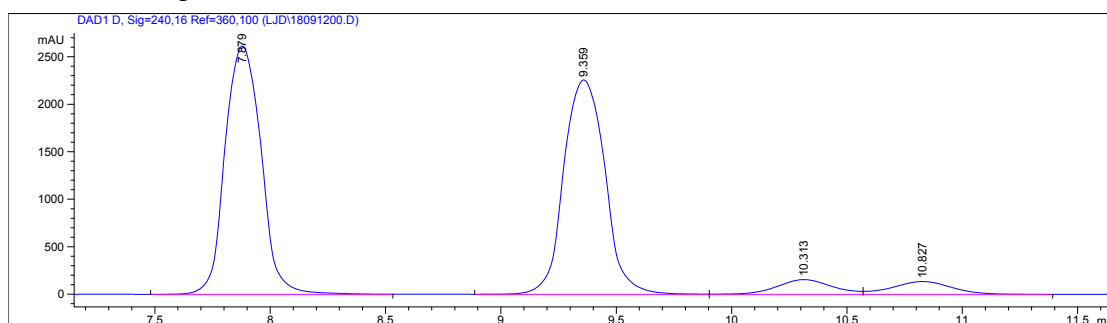

Signal 4: DAD1 D, Sig=240,16 Ref=360,100

| Peak # | RetTime [min] | Type | Width [min] | Area [mAU*s] | Height [mAU] | Area %  |
|--------|---------------|------|-------------|--------------|--------------|---------|
| 1      | 7.879         | VB   | 0.1823      | 2.83293e4    | 2615.99854   | 46.2040 |
| 2      | 9.359         | VV   | 0.2087      | 2.79982e4    | 2257.77661   | 45.6641 |
| 3      | 10.313        | VV   | 0.2533      | 2568.42871   | 155.00015    | 4.1890  |
| 4      | 10.827        | VB   | 0.2706      | 2417.55420   | 135.20712    | 3.9429  |

Totals : 6.13135e4 5163.98242

Results obtained with enhanced integrator!

## Asymmetric version:

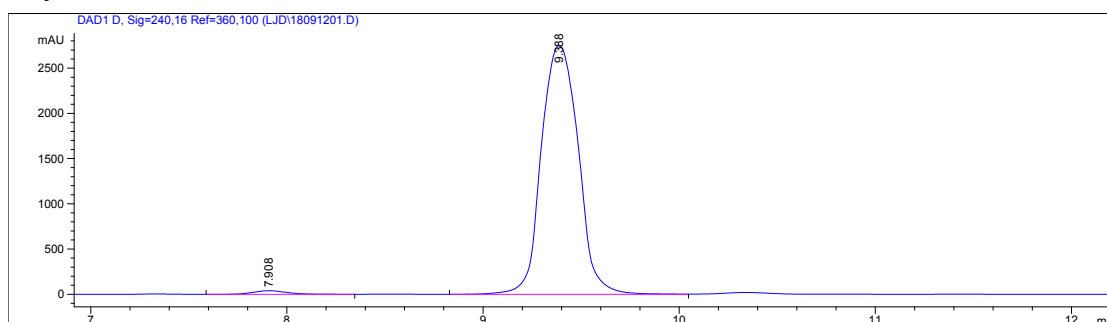

Signal 4: DAD1 D, Sig=240,16 Ref=360,100

| Peak # | RetTime [min] | Type | Width [min] | Area [mAU*s] | Height [mAU] | Area %  |
|--------|---------------|------|-------------|--------------|--------------|---------|
| 1      | 7.908         | VB   | 0.1960      | 528.12909    | 40.53514     | 1.4452  |
| 2      | 9.388         | VV   | 0.2228      | 3.60154e4    | 2749.39160   | 98.5548 |

Totals : 3.65435e4 2789.92674

Results obtained with enhanced integrator!

## 3pb

Racemic sample

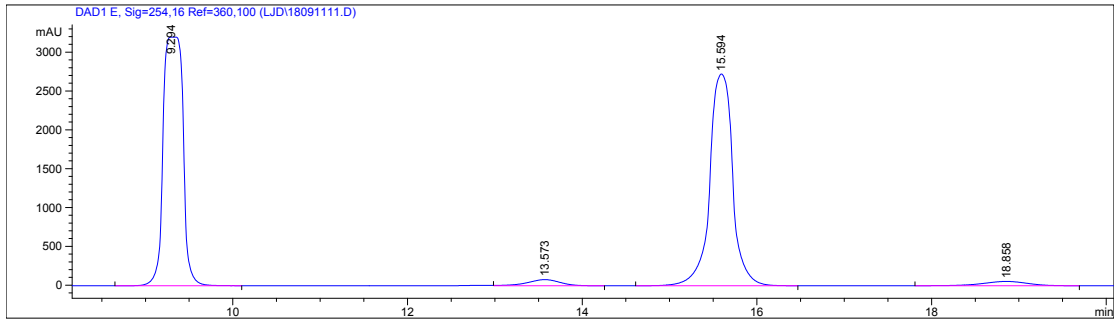

Signal 5: DAD1 E, Sig=254,16 Ref=360,100

| Peak # | RetTime [min] | Type | Width [min] | Area [mAU*s] | Height [mAU] | Area %  |
|--------|---------------|------|-------------|--------------|--------------|---------|
| 1      | 9.294         | VB   | 0.2131      | 5.02235e4    | 3200.12305   | 48.3111 |
| 2      | 13.573        | VB   | 0.3894      | 2050.19409   | 78.83678     | 1.9721  |
| 3      | 15.594        | VB   | 0.2886      | 4.96773e4    | 2726.61816   | 47.7857 |
| 4      | 18.858        | BV   | 0.4781      | 2007.45410   | 56.01735     | 1.9310  |

Totals : 1.03959e5 6061.59535

Results obtained with enhanced integrator!

Asymmetric version:

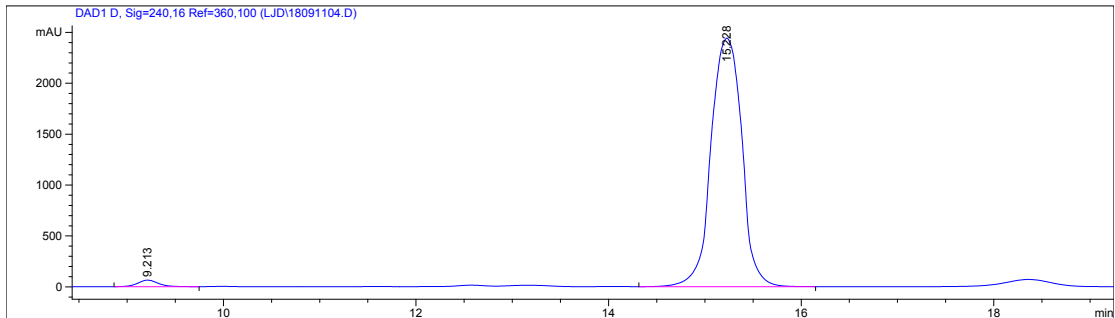

Signal 4: DAD1 D, Sig=240,16 Ref=360,100

| Peak # | RetTime [min] | Type | Width [min] | Area [mAU*s] | Height [mAU] | Area %  |
|--------|---------------|------|-------------|--------------|--------------|---------|
| 1      | 9.213         | BV   | 0.2287      | 981.03802    | 64.76698     | 1.7811  |
| 2      | 15.228        | VB   | 0.3765      | 5.40997e4    | 2442.09985   | 98.2189 |

Totals : 5.50807e4 2506.86684

Results obtained with enhanced integrator!

**3qc**

Racemic sample

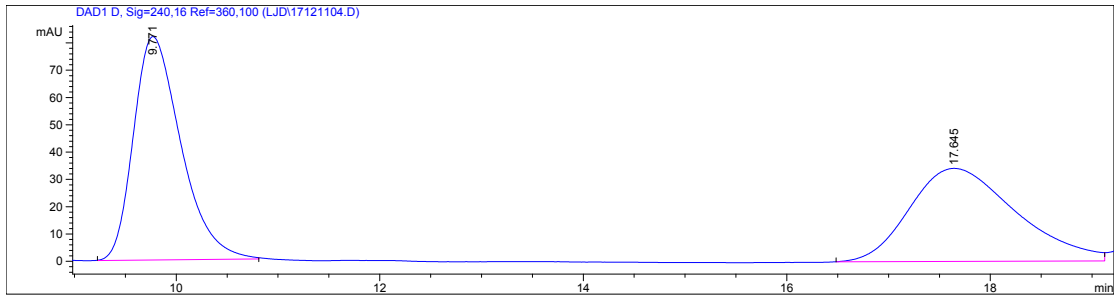

Signal 4: DAD1 D, Sig=240,16 Ref=360,100

| Peak # | RetTime [min] | Type | Width [min] | Area [mAU*s] | Height [mAU] | Area %  |
|--------|---------------|------|-------------|--------------|--------------|---------|
| 1      | 9.771         | BB   | 0.4991      | 2645.16162   | 81.82700     | 51.7251 |
| 2      | 17.645        | BV   | 1.0271      | 2468.72534   | 34.08263     | 48.2749 |

Totals : 5113.88696 115.90963

Results obtained with enhanced integrator!

Asymmetric version:

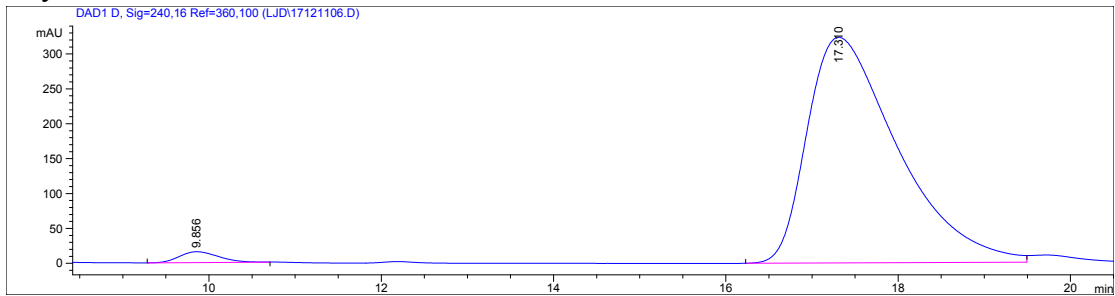

Signal 4: DAD1 D, Sig=240,16 Ref=360,100

| Peak # | RetTime [min] | Type | Width [min] | Area [mAU*s] | Height [mAU] | Area %  |
|--------|---------------|------|-------------|--------------|--------------|---------|
| 1      | 9.856         | PB   | 0.4943      | 489.47516    | 15.50457     | 2.0330  |
| 2      | 17.310        | BB   | 1.0951      | 2.35867e4    | 323.32935    | 97.9670 |

Totals : 2.40761e4 338.83391

Results obtained with enhanced integrator!

### 3aa

Racemic sample

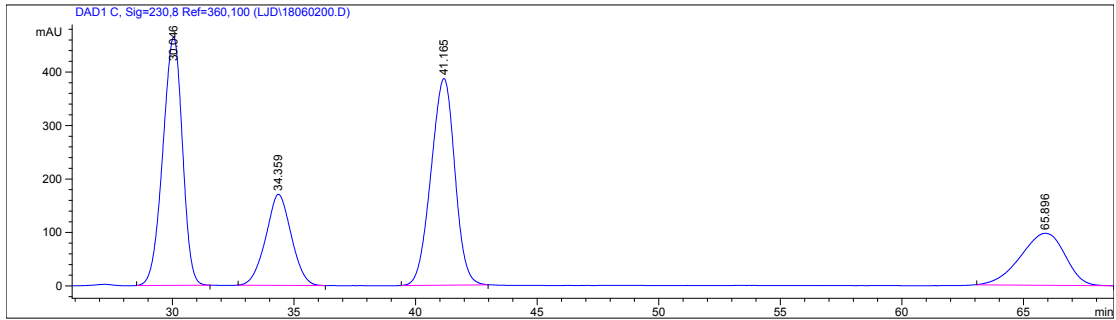

Signal 3: DAD1 C, Sig=230,8 Ref=360,100

| Peak # | RetTime [min] | Type | Width [min] | Area [mAU*s] | Height [mAU] | Area %  |
|--------|---------------|------|-------------|--------------|--------------|---------|
| 1      | 30.046        | BB   | 0.8785      | 2.60466e4    | 464.27426    | 33.6885 |
| 2      | 34.359        | BB   | 1.0769      | 1.24248e4    | 170.36404    | 16.0702 |
| 3      | 41.165        | BB   | 1.0527      | 2.64113e4    | 386.73834    | 34.1602 |
| 4      | 65.896        | BBA  | 1.5633      | 1.24333e4    | 97.26680     | 16.0812 |

Totals : 7.73161e4 1118.64345

Results obtained with enhanced integrator!

Asymmetric version:

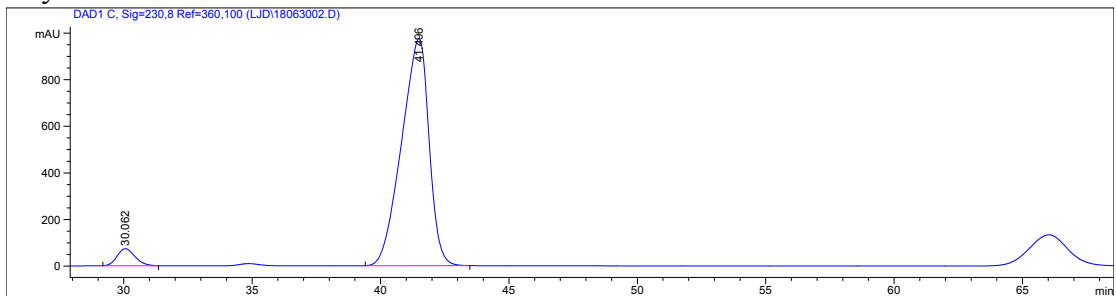

Signal 3: DAD1 C, Sig=230,8 Ref=360,100

| Peak # | RetTime [min] | Type | Width [min] | Area [mAU*s] | Height [mAU] | Area %  |
|--------|---------------|------|-------------|--------------|--------------|---------|
| 1      | 30.062        | BB   | 0.7428      | 3583.64795   | 73.50460     | 4.7110  |
| 2      | 41.496        | BB   | 1.0971      | 7.24859e4    | 975.28894    | 95.2890 |

Totals : 7.60695e4 1048.79354

Results obtained with enhanced integrator!

### 3ad

Racemic sample

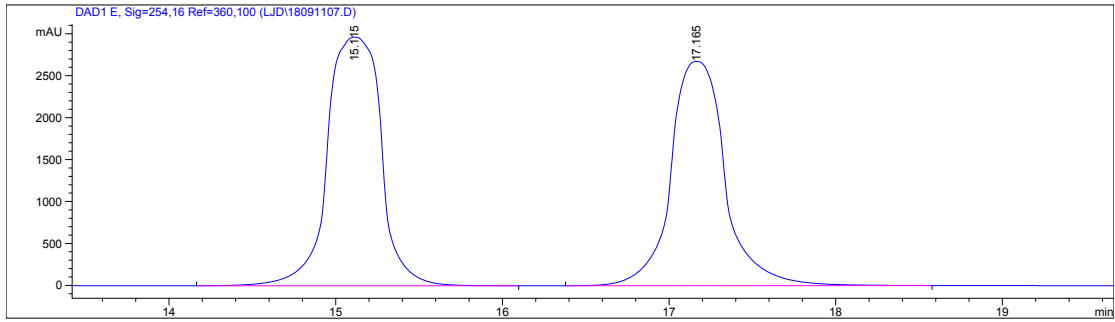

Signal 5: DAD1 E, Sig=254,16 Ref=360,100

| Peak # | RetTime [min] | Type | Width [min] | Area [mAU*s] | Height [mAU] | Area %  |
|--------|---------------|------|-------------|--------------|--------------|---------|
| 1      | 15.115        | PB   | 0.3279      | 6.60251e4    | 2963.95947   | 52.2491 |
| 2      | 17.165        | BB   | 0.3573      | 6.03410e4    | 2673.52197   | 47.7509 |

Totals : 1.26366e5 5637.48145

Results obtained with enhanced integrator!

Asymmetric version:

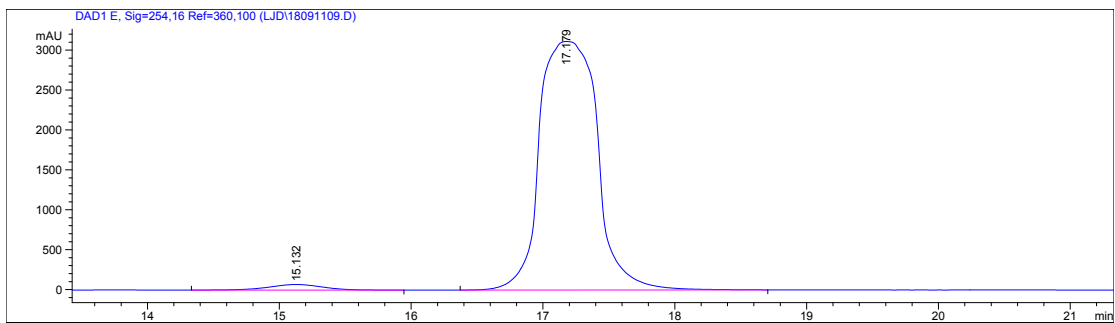

Signal 5: DAD1 E, Sig=254,16 Ref=360,100

| Peak # | RetTime [min] | Type | Width [min] | Area [mAU*s] | Height [mAU] | Area %  |
|--------|---------------|------|-------------|--------------|--------------|---------|
| 1      | 15.132        | BB   | 0.4150      | 2007.77673   | 70.34444     | 2.0851  |
| 2      | 17.179        | BB   | 0.4013      | 9.42826e4    | 3113.42725   | 97.9149 |

Totals : 9.62903e4 3183.77168

Results obtained with enhanced integrator!

**3ae**

Racemic sample

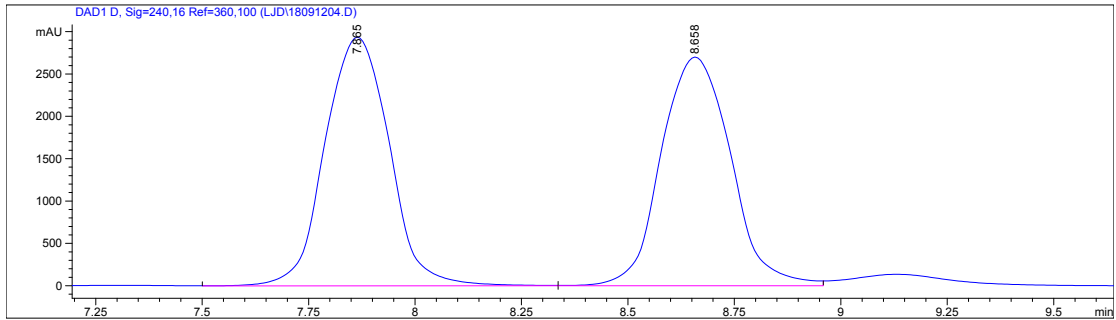

Signal 4: DAD1 D, Sig=240,16 Ref=360,100

| Peak # | RetTime [min] | Type | Width [min] | Area [mAU*s] | Height [mAU] | Area %  |
|--------|---------------|------|-------------|--------------|--------------|---------|
| 1      | 7.865         | VV   | 0.1764      | 3.08036e4    | 2936.23096   | 50.1223 |
| 2      | 8.658         | VV   | 0.1904      | 3.06533e4    | 2700.55957   | 49.8777 |

Totals : 6.14569e4 5636.79053

Results obtained with enhanced integrator!

Asymmetric version:

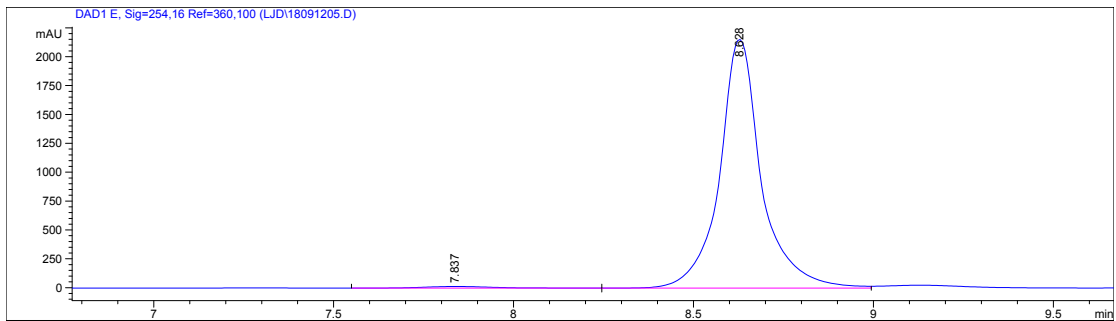

Signal 5: DAD1 E, Sig=254,16 Ref=360,100

| Peak # | RetTime [min] | Type | Width [min] | Area [mAU*s] | Height [mAU] | Area %  |
|--------|---------------|------|-------------|--------------|--------------|---------|
| 1      | 7.837         | VV   | 0.1909      | 181.96271    | 14.25587     | 1.0325  |
| 2      | 8.628         | VV   | 0.1185      | 1.74421e4    | 2153.25488   | 98.9675 |

Totals : 1.76241e4 2167.51076

Results obtained with enhanced integrator!

### 3cb (Gram scale)

Asymmetric version:



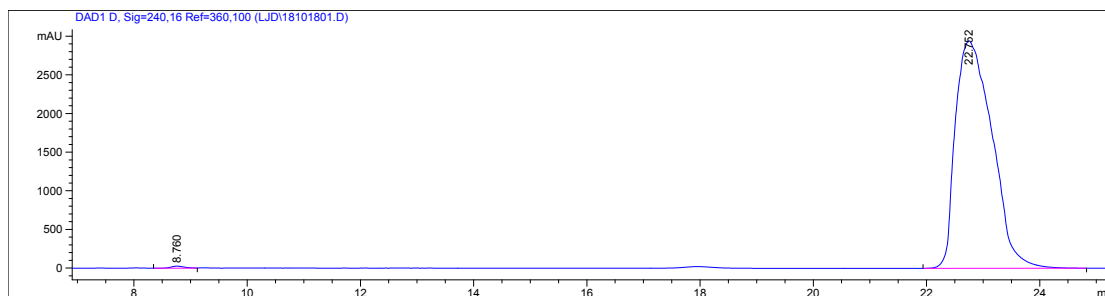

Signal 4: DAD1 D, Sig=240,16 Ref=360,100

| Peak # | RetTime [min] | Type | Width [min] | Area [mAU*s] | Height [mAU] | Area %  |
|--------|---------------|------|-------------|--------------|--------------|---------|
| 1      | 8.760         | VV   | 0.2546      | 451.85510    | 26.54964     | 0.3400  |
| 2      | 22.752        | BB   | 0.5572      | 1.32430e5    | 2941.99805   | 99.6600 |

Totals : 1.32881e5 2968.54769

Results obtained with enhanced integrator!

## Part IV Crystal data

A single crystal for X-ray analysis of **3ad** was obtained by recrystallation from MeOH/petroleum ether

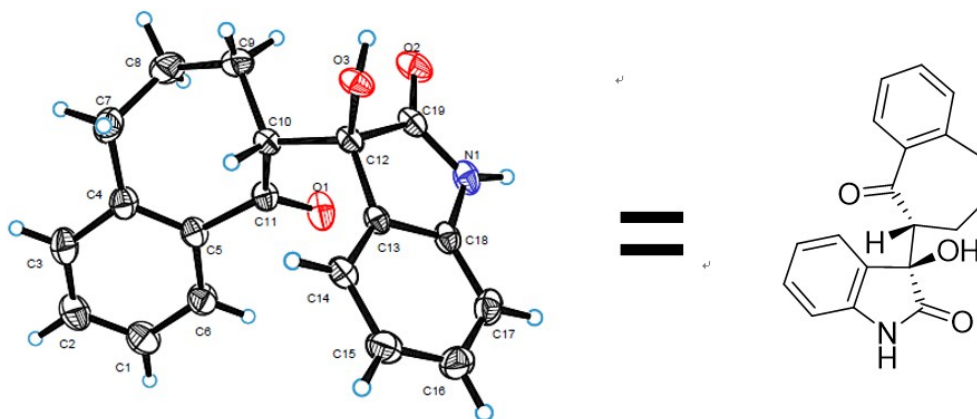

CCDC-1886489

Table 1 Crystal data and structure refinement for **3ad**.

Empirical formula  $C_{19}H_{17}NO_3$

|                                             |                                                                |
|---------------------------------------------|----------------------------------------------------------------|
| Formula weight                              | 307.33                                                         |
| Temperature/K                               | 291(2)                                                         |
| Crystal system                              | monoclinic                                                     |
| Space group                                 | P2 <sub>1</sub>                                                |
| a/Å                                         | 9.72310(10)                                                    |
| b/Å                                         | 5.89620(10)                                                    |
| c/Å                                         | 13.7204(2)                                                     |
| $\alpha$ /°                                 | 90                                                             |
| $\beta$ /°                                  | 99.6750(10)                                                    |
| $\gamma$ /°                                 | 90                                                             |
| Volume/Å <sup>3</sup>                       | 775.394(19)                                                    |
| Z                                           | 2                                                              |
| $\rho_{\text{calc}}/\text{cm}^3$            | 1.316                                                          |
| $\mu/\text{mm}^{-1}$                        | 0.723                                                          |
| F(000)                                      | 324.0                                                          |
| Crystal size/mm <sup>3</sup>                | 0.290 × 0.250 × 0.200                                          |
| Radiation                                   | CuK $\alpha$ ( $\lambda$ = 1.54184)                            |
| 2 $\theta$ range for data collection/°      | 9.226 to 147.88                                                |
| Index ranges                                | -12 ≤ h ≤ 12, -6 ≤ k ≤ 7, -14 ≤ l ≤ 17                         |
| Reflections collected                       | 14052                                                          |
| Independent reflections                     | 2942 [ $R_{\text{int}}$ = 0.0294, $R_{\text{sigma}}$ = 0.0168] |
| Data/restraints/parameters                  | 2942/1/209                                                     |
| Goodness-of-fit on F <sup>2</sup>           | 1.043                                                          |
| Final R indexes [ $I \geq 2\sigma(I)$ ]     | $R_1$ = 0.0328, $wR_2$ = 0.0862                                |
| Final R indexes [all data]                  | $R_1$ = 0.0336, $wR_2$ = 0.0875                                |
| Largest diff. peak/hole / e Å <sup>-3</sup> | 0.10/-0.18                                                     |
| Flack parameter                             | 0.05(12)                                                       |
